# Supplementary material for: Electrochemical oxidative heterodifunctionalization of dehydroalanine: access to unnatural α,α-disubstituted amino esters
Source: Royal Society of Chemistry journal article supplement (doi:10.1039/d4qo00193a), 2024-01-01
Supplement: d4qo00193a1.pdf [file d4qo00193a1.pdf]

# Electrochemical oxidative heterodifunctionalization of dehydroalanine: Access to unnatural $\alpha$ , $\alpha$ - disubstituted amino esters

Hui Cao,<sup>a</sup> Ruitao Wang,<sup>a</sup> Qianqiu Zhang,<sup>a</sup> Cuifen Lu,<sup>a</sup> Yue Weng,<sup>a</sup> Meng Gao<sup>\*,a</sup>

## Supporting Information

### TABLE OF CONTENTS

|                                                                                      |    |
|--------------------------------------------------------------------------------------|----|
| 1. General Information.....                                                          | 2  |
| 2. General Experimental Procedures .....                                             | 2  |
| 2.1 Detailed Experimental Procedures for Dehydroalanine Derivatives .....            | 2  |
| 2.2 Optimization of reaction conditions .....                                        | 2  |
| 2.3 Methyl 2-acetamido-2-methoxy-3-(phenylselenanyl)propanoate (3ca) Synthesis ..... | 4  |
| 2.4 Methyl 2-acetamido-2,3-dimethoxypropanoate (3aa) Synthesis .....                 | 4  |
| 2.5 Methyl 2-acetamido-2,3-diazidopropanoate (4ba) Synthesis .....                   | 4  |
| 2.6 Gram-scale synthesis of 1a at 3 mmol scale .....                                 | 5  |
| 2.7 Thiostrepton functionalization.....                                              | 5  |
| 3. Mechanistic Experiments.....                                                      | 8  |
| 3.1 Radical trapping experiments .....                                               | 8  |
| 3.2 Cyclic voltammetry experiments .....                                             | 11 |
| 4. Detailed descriptions for products: .....                                         | 12 |
| 5. NMR spectra of all products.....                                                  | 25 |
| 6. X-ray single-crystal data.....                                                    | 64 |

# 1. General Information

Unless otherwise stated, analytical grade solvents and commercially available reagents were used without further purification. All solvents were analytical reagent or better and were degassed prior to use. The instrument for electrolysis was dual display potentiostat (DJS-292B) (made in China). The anode electrode is carbon rod electrodes ( $\Phi$  6mm) and the cathode electrode is platinum plate electrodes (15 mm $\times$ 15 mm $\times$ 0.3 mm). Thin layer chromatography (TLC) employed glass 0.25 mm silica gel plates. Flash chromatography columns were packed with 200-300 mesh silica gel in petroleum (boiling point is between 60-90°C). Gradient flash chromatography was conducted eluting with a continuous gradient from petroleum to the indicated solvent, and they are listed as volume/volume ratios. High resolution mass spectra (HRMS) for molecular were measured with an Agilent 6224 instrument and accurate masses were reported for the molecular ion + Hydrogen (M+H) or molecular ion + Sodium (M+Na). The  $^1\text{H}$ ,  $^{13}\text{C}$  NMR spectra were recorded on a Bruker Advance III (400 MHz) spectrometers with tetramethylsilane as an internal standard. All chemical shifts ( $\delta$ ) are reported in ppm and coupling constants (J) in Hz. For  $^1\text{H}$  NMR, chemical shifts ( $\delta$ ) were given in ppm relative to internal standard (TMS at 0 ppm,  $\text{CDCl}_3$  at 7.26 ppm). For  $^{13}\text{C}$ -NMR, chemical shifts ( $\delta$ ) were reported in ppm using solvent as internal standard ( $\text{CDCl}_3$  at 77.00 ppm).

## 2. General Experimental Procedures

### 2.1 Detailed Experimental Procedures for Dehydroalanine Derivatives<sup>[1][2][3]</sup>

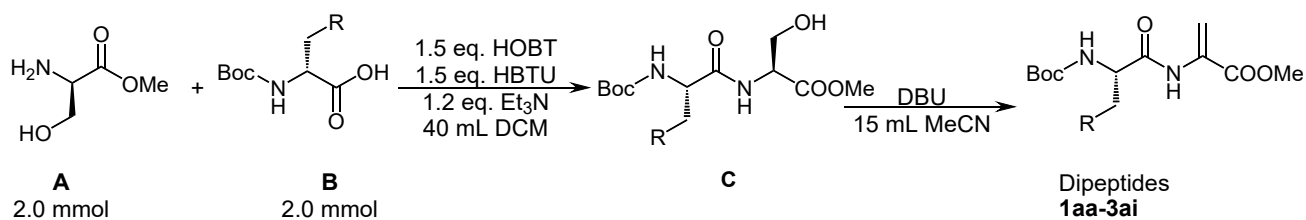

To a solution of Boc-L-serine **A** (410 mg, 2.0 mmol, 1.0 equiv.) in 40 mL  $\text{CH}_2\text{Cl}_2$  was added HOBT (1-hydroxybenzotriazole) (3.0 mmol), HBTU (O-benzotriazole-N, N, N', N'-tetramethyluronium-hexafluorophosphate) (3.0 mmol) and triethylamine (2.4 mmol). The mixture was stirred for 30 min at room temperature, and then, peptide **B** (2.0 mmol) was added to the solution. The reaction was stirred overnight. After regular workup, the reaction mixture washed by saturated  $\text{NaHCO}_3$  solution (40 mL  $\times$  3), 2 M hydrochloric acid solution (40 mL  $\times$  3) and  $\text{H}_2\text{O}$  (40 mL  $\times$  3). The organic layers were combined, dried over  $\text{Na}_2\text{SO}_4$ , and concentrated. The resulting crude product was purified by flash chromatography (DCM/MeOH) to afford corresponding dipeptides **C**. To a solution of **C** (2.0 mmol, 1.0 equiv.) in 15 mL MeCN was added DBU (10 mmol, 5 equiv.), and the resulting mixture was stirred for an additional 8 hours.

### 2.2 Optimization of reaction conditions

#### Table S1 Optimization of the reaction conditions

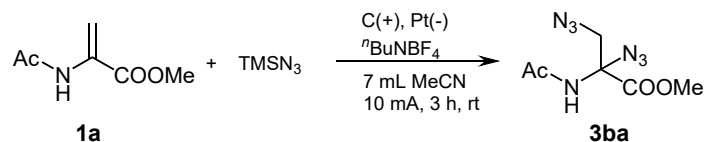

| Entry | Variaton from the standard conditions <sup>a</sup> | yield |
|-------|----------------------------------------------------|-------|
| 1     | none                                               | 46    |
| 2     | Without electric current                           | N.D.  |
| 3     | <sup>n</sup> Bu <sub>4</sub> NI                    | N.D.  |
| 4     | <sup>n</sup> Bu <sub>4</sub> NF                    | N.D.  |
| 5     | <sup>n</sup> Bu <sub>4</sub> NPF <sub>6</sub>      | 27    |
| 6     | <sup>n</sup> Bu <sub>4</sub> NClO <sub>4</sub>     | 20    |
| 7     | LiClO <sub>4</sub>                                 | Trace |
| 8     | 5 mA                                               | 29    |
| 9     | 15 mA                                              | 36    |

<sup>a</sup>Reaction conditions: undivided cell, carbon rod anode, Pt cathode, **1a** (0.2 mmol), TMSN<sub>3</sub> (1 mmol), <sup>n</sup>Bu<sub>4</sub>NBF<sub>4</sub> (0.2 mmol), MeCN (7mL), air, rt, 10 mA, 3 h. yield of isolated products. N.D = Not Detected

**Table S2 Optimization of the reaction conditions**

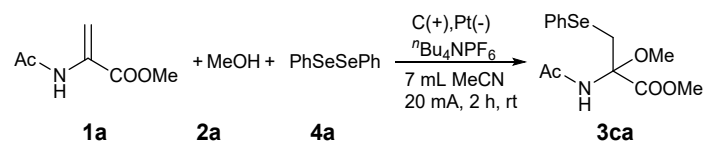

| Entry | Variaton from the standard conditions <sup>a</sup> | yield |
|-------|----------------------------------------------------|-------|
| 1     | none                                               | 92    |
| 2     | Without electric current                           | N.D.  |
| 3     | C(+), Zn(-)                                        | 70    |
| 4     | C(+), Ni(-)                                        | 82    |
| 5     | C(+), Fe(-)                                        | 59    |
| 6     | Pt(+), Pt(-)                                       | 42    |
| 7     | 10 mA, 4 h                                         | 83    |
| 8     | 15 mA, 4 h                                         | 73    |
| 9     | <sup>n</sup> Bu <sub>4</sub> NClO <sub>4</sub>     | 66    |
| 10    | <sup>n</sup> Bu <sub>4</sub> NBF <sub>4</sub>      | 53    |
| 11    | <sup>n</sup> Bu <sub>4</sub> NI                    | N.D.  |
| 12    | 2eq of <b>2a</b>                                   | 67    |
| 13    | 6eq of <b>2a</b>                                   | 78    |

<sup>a</sup>Reaction conditions: undivided cell, carbon rod anode, Pt cathode, **1a** (0.2 mmol), **2a** (0.8 mmol),

$n\text{Bu}_4\text{NPF}_6$  (0.2 mmol), **4a** (0.2 mmol), MeCN (7 mL), air, rt, 20 mA, 2 h. yield of isolated products.

N.D = Not Detected

### 2.3 Methyl 2-acetamido-2-methoxy-3-(phenylselanyl)propanoate (**3ca**) Synthesis

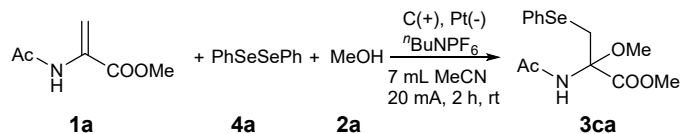

In an oven-dried undivided three-necked bottle (10 mL) equipped with a stir bar, **1a** (0.2 mmol), **4a** (0.2 mmol), **2a** (0.8 mmol) and  $n\text{Bu}_4\text{NPF}_6$  (0.2 mmol) were combined and added. Under the air,  $\text{CH}_3\text{CN}$  (7 mL) were injected respectively into the tubes via syringes. The bottle was equipped with carbon rod ( $\phi$  6 mm, about 10 mm immersion depth in solution) as the anode and platinum plate (15 mm $\times$ 15 mm $\times$ 0.3 mm) as the cathode. The reaction mixture was stirred and electrolyzed at a constant current of 20 mA under room temperature for 1.5 h. After completion of the reaction, as indicated by TLC, the pure product (yield: 92%, 60.72 mg) was obtained by flash column chromatography on silica gel (eluent: petroleum ether/ethyl acetate= 1.5:1).

### 2.4 Methyl 2-acetamido-2,3-dimethoxypropanoate (**3aa**) Synthesis

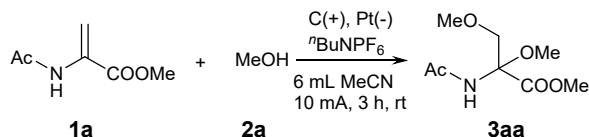

In an oven-dried undivided three-necked bottle (10 mL) equipped with a stir bar, **1a** (0.2 mmol), **2a** (1 mL) and  $n\text{Bu}_4\text{NPF}_6$  (0.2 mmol) were combined and added. Under the air,  $\text{CH}_3\text{CN}$  (6 mL) were injected respectively into the tubes via syringes. The bottle was equipped with carbon rod ( $\phi$  6 mm, about 10 mm immersion depth in solution) as the anode and platinum plate (15 mm $\times$ 15 mm $\times$ 0.3 mm) as the cathode. The reaction mixture was stirred and electrolyzed at a constant current of 10 mA under room temperature for 3 h. After completion of the reaction, as indicated by TLC, the pure product (yield: 85%, 34.88 mg) was obtained by flash column chromatography on silica gel (eluent: petroleum ether/ethyl acetate= 1.5:1).

### 2.5 Methyl 2-acetamido-2,3-diazidopropanoate (**4ba**) Synthesis

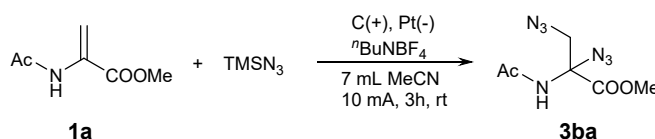

In an oven-dried undivided three-necked bottle (10 mL) equipped with a stir bar, **1a** (0.2 mmol),  $\text{TMSN}_3$  (1 mol) and  $n\text{Bu}_4\text{NBF}_4$  (0.2 mmol) were combined and added. Under the air,  $\text{CH}_3\text{CN}$  (7 mL) were injected respectively into the tubes via syringes. The bottle was equipped with carbon rod ( $\phi$  6 mm, about 10 mm immersion depth in solution) as the anode and platinum plate (15

mm×15 mm×0.3 mm) as the cathode. The reaction mixture was stirred and electrolyzed at a constant current of 10 mA under room temperature for 3 h. After completion of the reaction, as indicated by TLC, the pure product (yield: 46%, 20.90 mg) was obtained by flash column chromatography on silica gel (eluent: petroleum ether/ethyl acetate= 1.5:1).

## 2.6 Gram-scale synthesis of **1a** at 3 mmol scale

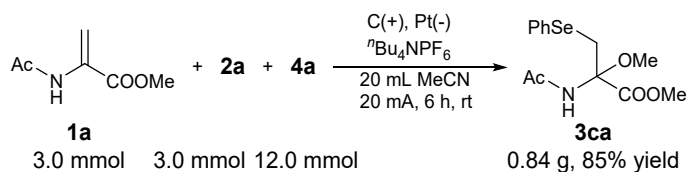

<sup>a</sup> Reaction conditions: **1a** (3.0 mmol), **2a** (3.0 mmol), **4a** (12.0 mmol), <sup>n</sup>Bu<sub>4</sub>NPF<sub>6</sub> (3.0 mmol), CH<sub>3</sub>CN (20 mL), carbon rod (ϕ 6 mm, about 10 mm immersion depth in solution) as the anode and platinum plate (15 mm×15 mm×0.3 mm) as the cathode, 20 mA, 6 h, rt, undivided cell. <sup>b</sup>Isolated yields.

## 2.7 Thiostrepton functionalization

In an oven-dried undivided three-necked bottle (5 mL) equipped with a stir bar, thiostrepton (10 mg), MeOH (20 μL), <sup>n</sup>Bu<sub>4</sub>NPF<sub>6</sub> (10 mg), CH<sub>3</sub>CN (2 mL) were combined and added. The bottle was equipped carbon paper (Φ 1mm) as the anode and platinum wire (Φ 0.4mm) as the cathode. The reaction mixture was stirred and electrolysis at constant current of 10 mA under room temperature for 15 min. The reaction mixture was diluted with 5 mL ethyl acetate and 5 mL H<sub>2</sub>O, the phases were washed with brine dried over MgSO<sub>4</sub> and the solvent was removed under vacuum. The sample was analyzed by MALDI-TOF with DHB as matrix. For determination of the product distribution, the areas of all the [M]<sup>+</sup>-peaks of the products were summed up and divided by the area of the corresponding product.

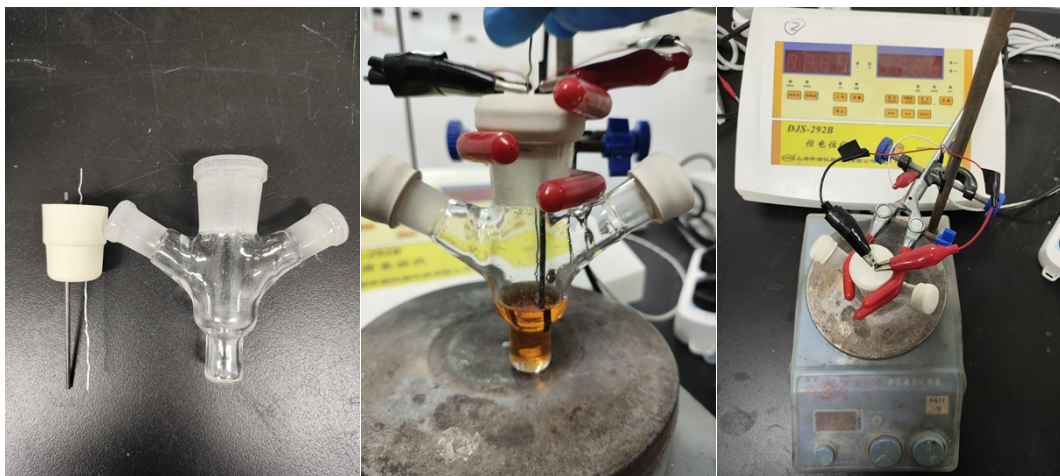

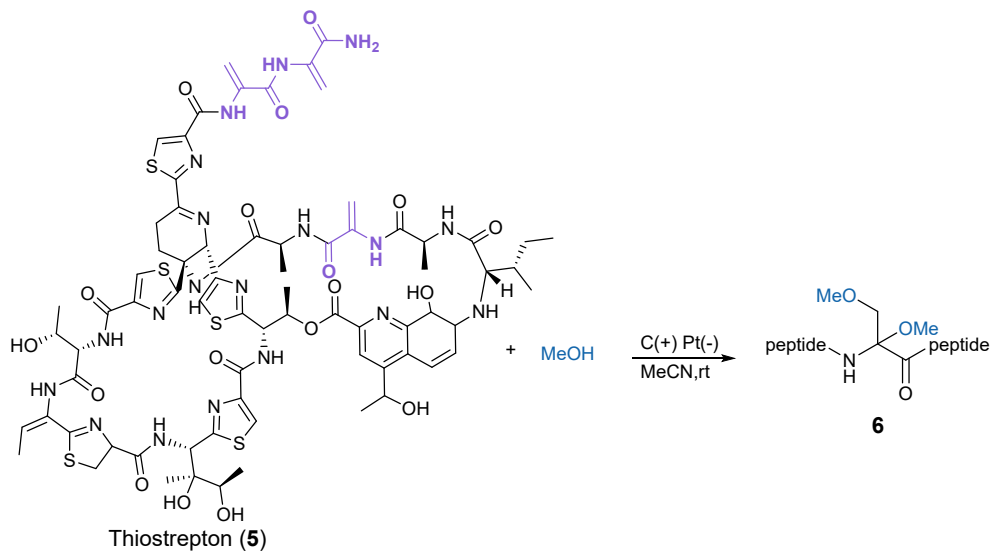

| Product           | m/z [M] <sup>+</sup> | t = 10 min | t = 30 min |
|-------------------|----------------------|------------|------------|
| Starting material | 1664                 | 58         | 35         |
| Mono              | 1726                 | 27         | 37         |
| Product           | m/z [M] <sup>+</sup> | t = 10 min | t = 30 min |
| Di                | 1788                 | 10         | 14         |
| Tri               | 1850                 | 5          | 14         |

t=10 min

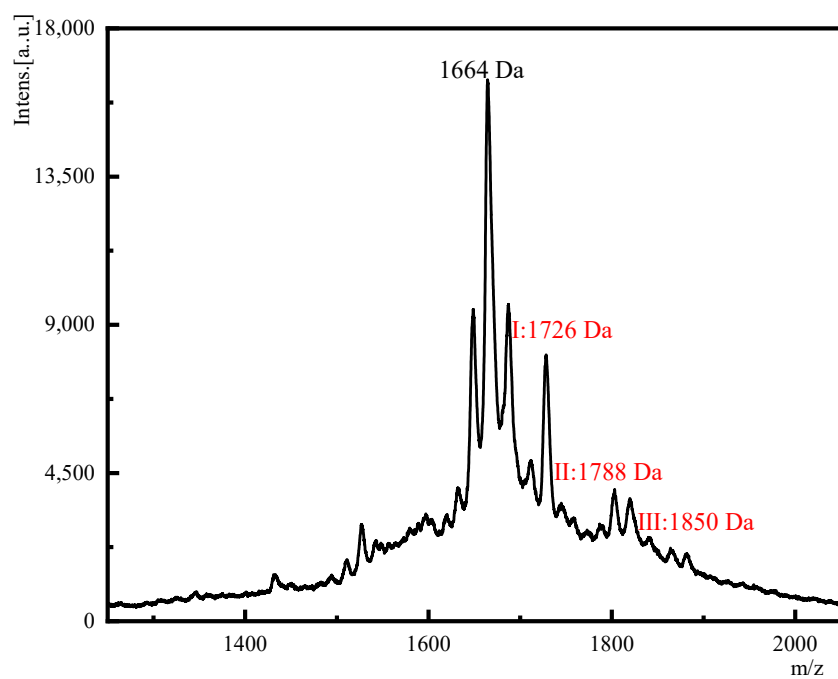

t=30 min

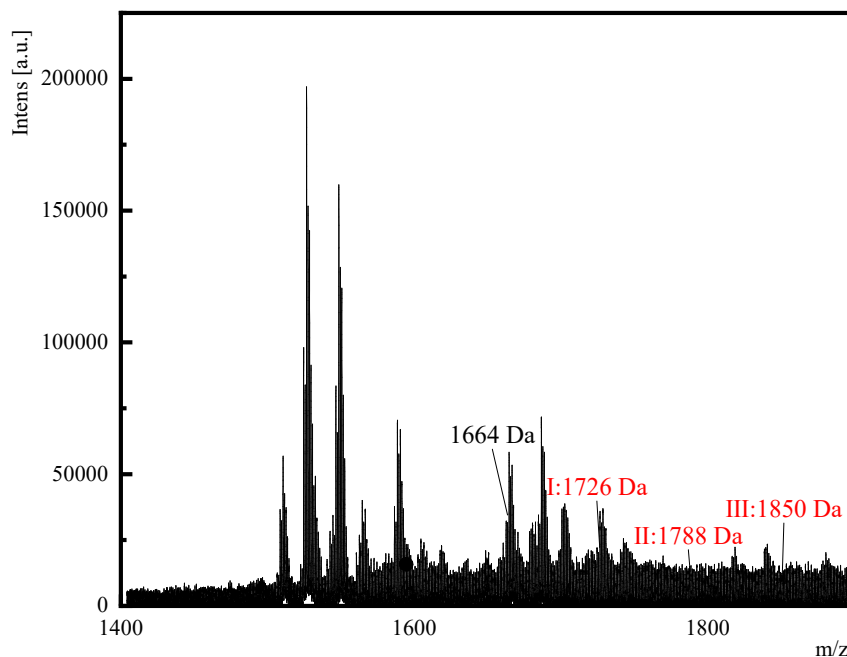

**Figure S1.** MALDI-TOF measurement of the crude product of the electrochemical modification of thiostrepton with MeOH

### Thiostrepton functionalization

In an oven-dried undivided three-necked bottle (5 mL) equipped with a stir bar, thiostrepton (10 mg), TMSN<sub>3</sub> (20  $\mu$ L), <sup>n</sup>Bu<sub>4</sub>NBF<sub>4</sub> (10 mg), CH<sub>3</sub>CN (3 mL) were combined and added. The bottle was equipped carbon paper ( $\Phi$  1mm) as the anode and platinum wire ( $\Phi$  0.4mm) as the cathode. The reaction mixture was stirred and electrolysis at constant current of 10 mA under room temperature for 15 min. The reaction mixture was diluted with 5 mL ethyl acetate and 5 mL H<sub>2</sub>O, the phases were washed with brine dried over MgSO<sub>4</sub> and the solvent was removed under vacuum. The sample was analyzed by MALDI-TOF with DHB as matrix. For determination of the product distribution, the areas of all the [M]<sup>+</sup>-peaks of the products were summed up and divided by the area of the corresponding product.

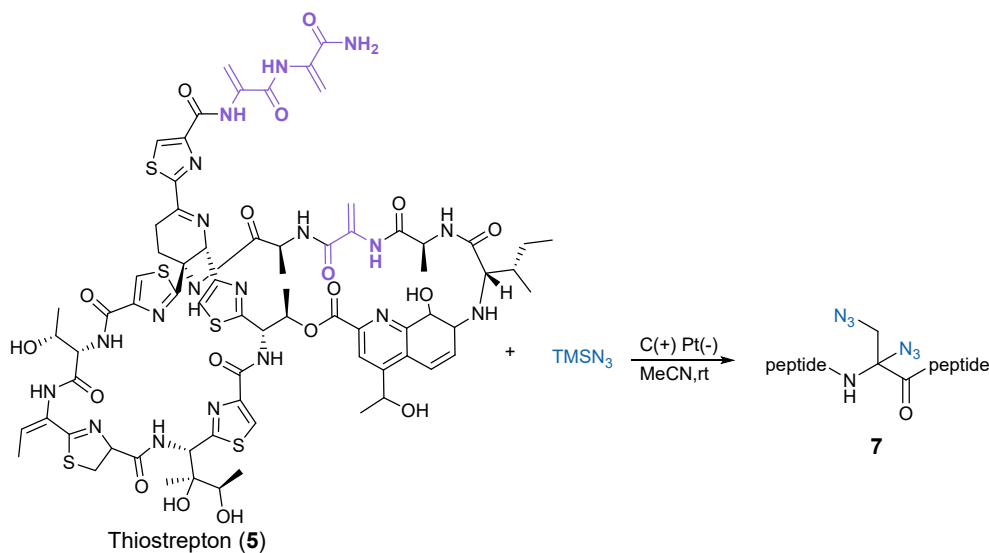

| Product           | m/z [M] <sup>+</sup> | t = 10 min | t = 30 min |
|-------------------|----------------------|------------|------------|
| Starting material | 1664                 | 39         | 20         |
| Mono              | 1748                 | 32         | 38         |
| Di                | 1832                 | 21         | 31         |
| Tri               | 1916                 | 8          | 11         |

t=10 min

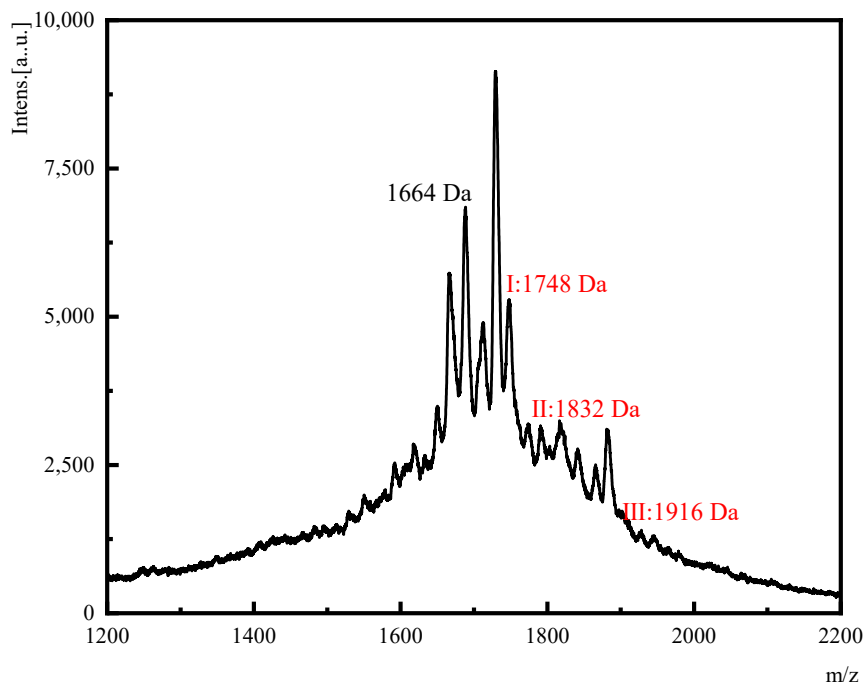

t=30 min

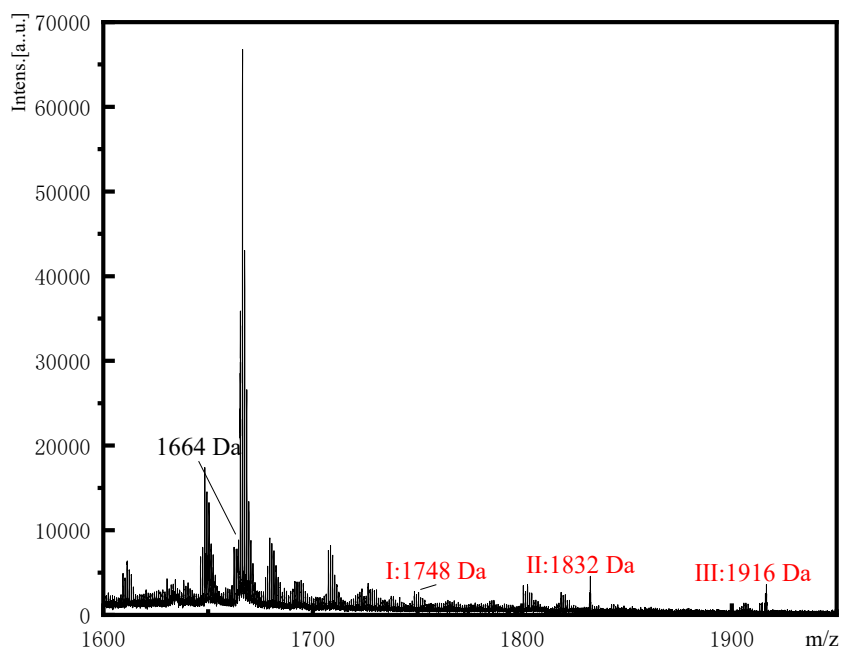

**Figure S2.** MALDI-TOF measurement of the crude product of the electrochemical modification of thioestrepton with TMSN<sub>3</sub>

### 3. Mechanistic Experiments

#### 3.1 Radical trapping experiments



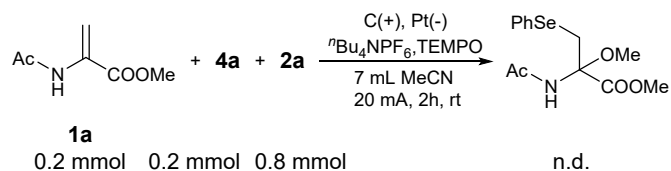

<sup>a</sup> Reaction conditions: **1a** (0.2 mmol), **4a** (0.2 mmol), **2a** (0.8 mmol), <sup>n</sup>Bu<sub>4</sub>NPF<sub>6</sub> (0.2 mmol), CH<sub>3</sub>CN (7 mL), carbon rod (ϕ 6 mm, about 10 mm immersion depth in solution) as the anode and platinum plate (15 mm×15 mm×0.3 mm) as the cathode, 2 h, rt, undivided cell.

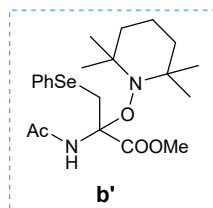

Detected by HRMS of **b'** calcd for C<sub>15</sub>H<sub>23</sub>NOSe

[M+H]<sup>+</sup>: 451.1659; Found: 451.1650

**Figure S3.** The HRMS spectra of compound **b'**

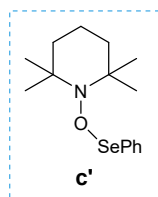

Detected by HRMS of **c'** calcd for C<sub>15</sub>H<sub>23</sub>NOSe

[M+H]<sup>+</sup>: 308.1077; Found: 308.1035

**Figure S4.** The HRMS spectra of compound **c'**

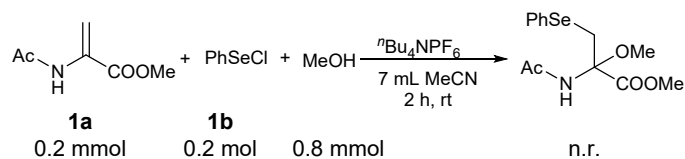

<sup>a</sup> Reaction conditions: **1a** (0.2 mmol), **1b** (0.2 mmol), **2a** (0.8 mmol), <sup>n</sup>Bu<sub>4</sub>NPF<sub>6</sub> (0.2 mmol), TEMPO (0.6 mmol), CH<sub>3</sub>CN (7 mL), carbon rod (ϕ 6 mm, about 10 mm immersion depth in solution) as the anode and platinum plate (15 mm×15 mm×0.3 mm) as the cathode, 20 mA, 6 h, rt, undivided cell.

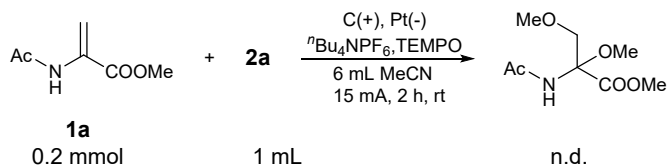

<sup>a</sup> Reaction conditions: **1a** (0.2 mmol), **2a** (1 mL), <sup>n</sup>Bu<sub>4</sub>NPF<sub>6</sub> (0.2 mmol), TEMPO (0.6 mmol), CH<sub>3</sub>CN (6 mL), carbon rod (ϕ 6 mm, about 10 mm immersion depth in solution) as the anode and platinum plate (15 mm×15 mm×0.3 mm) as the cathode, 15 mA, 5 h, rt, undivided cell.

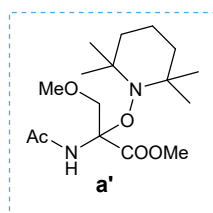

Detected by HRMS of **a'** calcd for C<sub>16</sub>H<sub>30</sub>N<sub>2</sub>O<sub>5</sub>

[M+Na]<sup>+</sup>: 353.20469; Found: 353.20473

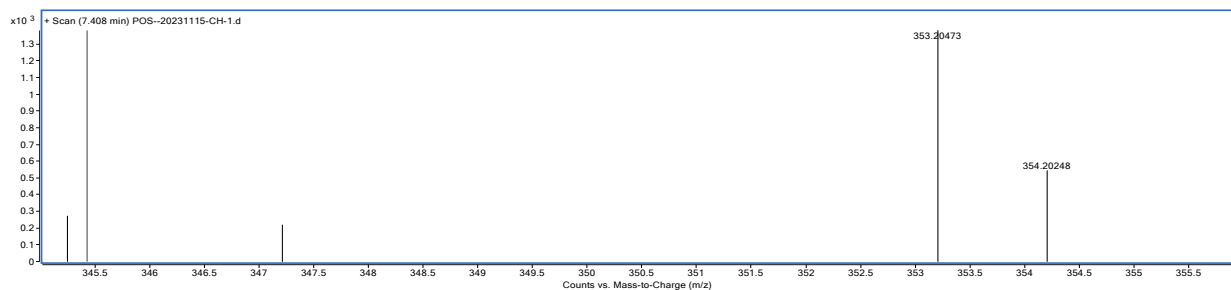

**Figure S5.** The HRMS spectra of compound **a'**

### 3.2 Cyclic voltammetry experiments

Cyclic voltammetry was performed in a three-electrode cell connected to a schlenk line at room temperature. The working electrode was a steady glassy carbon disk electrode, the counter electrode was a platinum wire. The reference was an Ag/AgCl electrode submerged in saturated aqueous KCl solution and separated from a reaction by a salt bridge. 8 mL of CH<sub>3</sub>CN containing 0.02 M *n*Bu<sub>4</sub>NPF<sub>6</sub> were poured into the electrochemical cell in all experiments. The scan rate is 0.1 V/s. The positive scan range was from 0 V to 3.0 V and 0 V to -3.0 V.

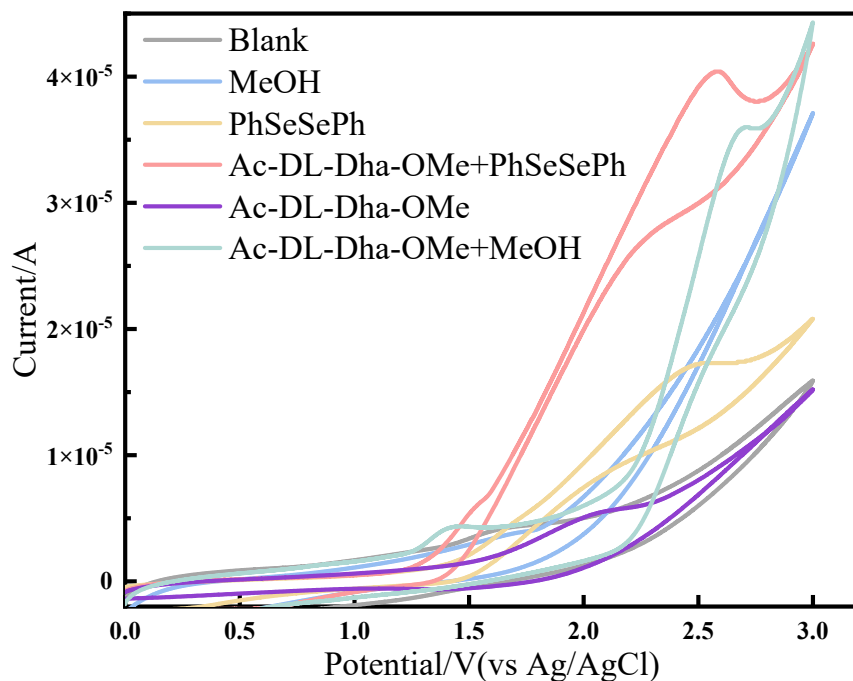

**Figure S5.** Cyclic voltammograms of substrate **1a**, **4a**, MeOH, **1a+4a**, **1a+MeOH** (0.02 M) 0-3 V

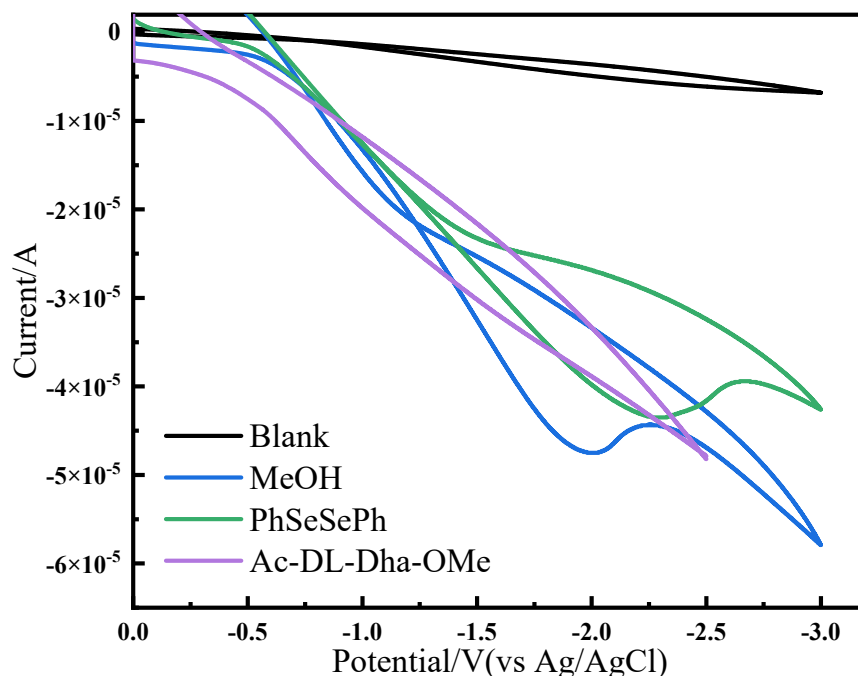

**Figure S6.** Cyclic voltammograms of substrate **1a**, **4a**, MeOH (0.02 M) -3-0 V

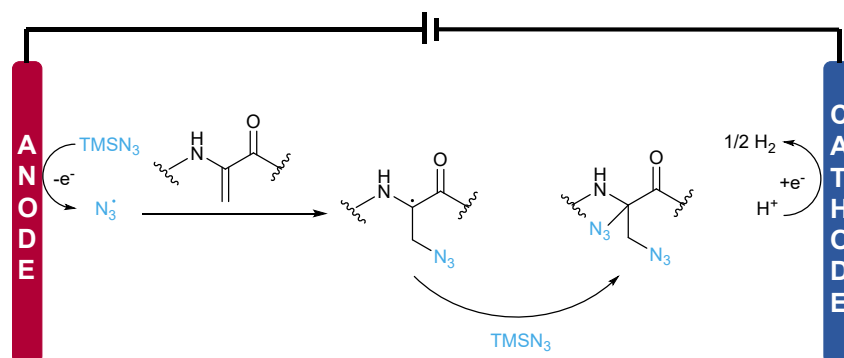

**Figure S7 :** Proposed mechanism of diazidation

#### 4. Detailed descriptions for products:

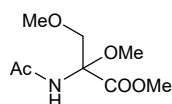

##### **Methyl 2-acetamido-2,3-dimethoxypropanoate (3aa):**

White solid (Yield: 90 %, 36.89 mg).  $^1\text{H}$  NMR (400 MHz, Chloroform- $d$ )  $\delta$  6.78 (s, 1H), 4.01 (d,  $J$  = 9.4 Hz, 1H), 3.80 (s, 3H), 3.67 (d,  $J$  = 9.4 Hz, 1H), 3.35 (s, 3H), 3.27 (s, 3H), 2.06 (s, 3H).  $^{13}\text{C}$  NMR (101 MHz, Chloroform- $d$ )  $\delta$  169.94, 169.51, 86.35, 73.44, 59.71, 53.24, 51.93, 23.71. HRMS (ESI) cald. For  $(\text{M}+\text{Na})^+$   $\text{C}_8\text{H}_{15}\text{NO}_5$ : 228.0842, found, 228.0842

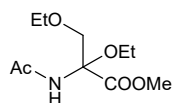

##### **Methyl 2-acetamido-2,3-diethoxypropanoate (3ab):**

White solid (Yield: 70 %, 32.65 mg).  $^1\text{H}$  NMR (400 MHz, Chloroform- $d$ )  $\delta$  6.83 (s, 1H), 4.15 (d,  $J$  = 9.6 Hz, 1H), 3.82 (s, 3H), 3.73 (d,  $J$  = 9.6 Hz, 1H), 3.65 – 3.41 (m, 4H), 2.08 (s, 3H), 1.18 (dt,

J = 16.8, 7.0 Hz, 6H).  $^{13}\text{C}$  NMR (101 MHz, Chloroform-d)  $\delta$  170.05, 169.75, 86.36, 71.31, 67.38, 60.04, 53.13, 23.82, 14.95. HRMS (ESI) cald. For  $(\text{M}+\text{Na})^+$   $\text{C}_{10}\text{H}_{19}\text{NO}_5$ : 256.1155, found, 256.1155.

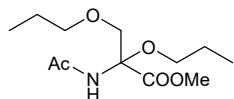

### Methyl 2-acetamido-2,3-dipropoxypropanoate (3ac):

White solid (Yield: 61 %, 31.88 mg).  $^1\text{H}$  NMR (400 MHz, Chloroform-d)  $\delta$  6.79 (s, 1H), 4.17 (d, J = 9.5 Hz, 1H), 3.80 (s, 3H), 3.71 (d, J = 9.5 Hz, 1H), 3.51 – 3.33 (m, 3H), 3.28 (dt, J = 8.7, 6.7 Hz, 1H), 2.05 (s, 3H), 1.64 – 1.43 (m, 4H), 0.86 (dt, J = 9.9, 7.4 Hz, 6H).  $^{13}\text{C}$  NMR (101 MHz, Chloroform-d)  $\delta$  170.18, 169.66, 86.53, 73.59, 71.25, 66.05, 53.06, 23.91, 22.82, 22.59, 10.52. HRMS (ESI) cald. For  $(\text{M}+\text{Na})^+$   $\text{C}_{12}\text{H}_{23}\text{NO}_5$ : 284.1468, found, 284.1462.

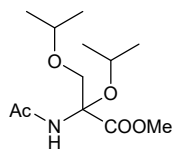

### Methyl 2-acetamido-2,3-diisopropoxypropanoate (3ad):

White solid (Yield: 56 %, 36.45mg).  $^1\text{H}$  NMR (400 MHz, Chloroform-d)  $\delta$  6.88 (s, 1H), 4.28 (d, J = 9.3 Hz, 1H), 3.89 (p, J = 6.2 Hz, 1H), 3.81 (s, 3H), 3.66 (d, J = 9.3 Hz, 1H), 3.59 (p, J = 6.1 Hz, 1H), 2.06 (s, 3H), 1.15 – 1.03 (m, 12H).  $^{13}\text{C}$  NMR (101 MHz, Chloroform-d)  $\delta$  171.15, 169.69, 86.51, 72.74, 68.69, 67.65, 52.97, 24.21, 23.74, 22.90, 22.07, 21.85. HRMS (ESI) cald. For  $(\text{M}+\text{Na})^+$   $\text{C}_{12}\text{H}_{23}\text{NO}_5$ : 284.1468, found, 284.1468.

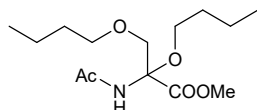

### Methyl 2-acetamido-2,3-dibutoxypropanoate (3ae)

Yellow oil (Yield: 56 %, 32.41mg).  $^1\text{H}$  NMR (400 MHz, Chloroform-d)  $\delta$  6.74 (s, 1H), 4.14 (d, J = 9.6 Hz, 1H), 3.78 (s, 3H), 3.69 (d, J = 9.6 Hz, 1H), 3.52 – 3.37 (m, 3H), 3.31 (dt, J = 9.0, 6.6 Hz, 1H), 2.02 (s, 3H), 1.55 – 1.42 (m, 4H), 1.30 (dq, J = 14.8, 7.4 Hz, 4H), 0.86 (td, J = 7.4, 3.1 Hz, 6H).  $^{13}\text{C}$  NMR (101 MHz, Chloroform-d)  $\delta$  170.12, 169.42, 86.56, 71.69, 71.34, 64.01, 52.88, 31.63, 31.45, 23.79, 19.12, 19.10, 13.72, 13.68. HRMS (ESI) cald. For  $(\text{M}+\text{Na})^+$   $\text{C}_{14}\text{H}_{27}\text{NO}_5$ : 312.1781, found, 312.1785.

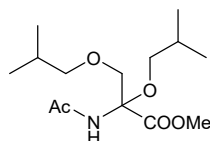

### Methyl 2-acetamido-2,3-diisobutoxypropanoate (3af)

Colorless oil (Yield: 56 %, 32.40mg).  $^1\text{H}$  NMR (400 MHz, Chloroform-d)  $\delta$  6.76 (s, 1H), 4.18 (d, J = 9.5 Hz, 1H), 3.78 (s, 3H), 3.71 (d, J = 9.5 Hz, 1H), 3.28 – 3.13 (m, 3H), 3.05 (dd, J = 8.6, 6.7

Hz, 1H), 2.03 (s, 3H), 1.79 (dq, J = 13.4, 6.6, 2.2 Hz, 2H), 0.88 – 0.79 (m, 12H). <sup>13</sup>C NMR (101 MHz, Chloroform-d) δ 170.17, 169.55, 169.44, 169.01, 86.60, 78.70, 71.36, 70.87, 52.85, 28.36, 28.17, 23.83, 19.30, 19.22, 19.07, 19.04, 18.86. HRMS (ESI) cald. For (M+Na)<sup>+</sup> C<sub>14</sub>H<sub>27</sub>NO<sub>5</sub>: 312.1781, found, 312.1796.

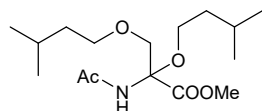

### Methyl 2-acetamido-2,3-bis(isopentyloxy)propanoate (3ag)

Colorless oil (Yield: 40 %, 25.39mg). <sup>1</sup>H NMR (400 MHz, Chloroform-d) δ 6.77 (s, 1H), 4.18 (d, J = 9.4 Hz, 1H), 3.81 (s, 3H), 3.72 (d, J = 9.6 Hz, 1H), 3.60 – 3.42 (m, 3H), 3.39 – 3.29 (m, 1H), 2.06 (s, 3H), 1.67 (ddt, J = 30.3, 13.4, 6.7 Hz, 2H), 1.50 – 1.36 (m, 4H), 0.87 (dd, J = 6.7, 2.9 Hz, 12H). <sup>13</sup>C NMR (101 MHz, Chloroform-d) δ 170.21, 169.65, 86.55, 71.28, 70.38, 62.62, 53.07, 38.34, 38.12, 25.99, 24.94, 24.71, 23.91, 22.56, 22.53, 22.49, 22.39. HRMS (ESI) cald. For (M+Na)<sup>+</sup> C<sub>16</sub>H<sub>31</sub>NO<sub>5</sub>: 340.2094, found, 340.2108.

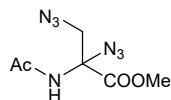

### Methyl 2-acetamido-2,3-diazidopropanoate (3ba):

Colorless oil (Yield: 46 %, 20.90 mg). <sup>1</sup>H NMR (400 MHz, Chloroform-d) δ 7.05 (s, 1H), 4.00 (d, J = 12.6 Hz, 1H), 3.90 (s, 3H), 3.53 (d, J = 12.5 Hz, 1H), 2.13 (s, 3H). <sup>13</sup>C NMR (101 MHz, Chloroform-d) δ 170.74, 167.17, 75.35, 53.98, 53.79, 22.89. HRMS (ESI) cald. For (M+Na)<sup>+</sup> C<sub>6</sub>H<sub>9</sub>N<sub>7</sub>O<sub>3</sub>: 250.0659, found, 250.0658.

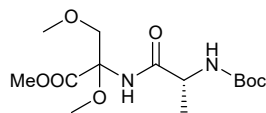

### Methyl 2-((R)-2-((tert-butoxycarbonyl)amino)propanamido)-2,3-dimethoxypropanoate (3ah):

Colorless oil (Yield: 85 %, 56.84 mg). <sup>1</sup>H NMR (400 MHz, Chloroform-d) δ 7.40 (d, J = 43.1 Hz, 1H), 5.06 (s, 1H), 4.22 (s, 1H), 4.04 (d, J = 9.6 Hz, 1H), 3.84 (s, 3H), 3.72 (d, J = 13.1 Hz, 1H), 3.33 (d, J = 32.6 Hz, 6H), 1.45 (s, 9H), 1.39 (d, J = 7.1 Hz, 3H). <sup>13</sup>C NMR (101 MHz, Chloroform-d) δ 172.62, 172.57, 169.31, 155.50, 86.52, 86.38, 80.30, 73.48, 73.31, 59.73, 53.21, 53.19, 51.88, 51.84, 50.48, 28.23, 17.93. HRMS (ESI) cald. For (M+Na)<sup>+</sup> C<sub>14</sub>H<sub>26</sub>N<sub>2</sub>O<sub>7</sub>: 357.1632, found, 357.1630.

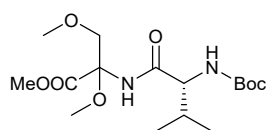

### Methyl 2-((R)-2-((tert-butoxycarbonyl)amino)-3-methylbutanamido)-2,3-

**dimethoxypropanoate (3ai):**

Colorless oil (Yield: 66%, 47.84 mg). <sup>1</sup>H NMR (400 MHz, Chloroform-d) δ 7.18 (d, J = 27.4 Hz, 1H), 5.02 (s, 1H), 4.02 (d, J = 9.5 Hz, 1H), 3.84 (d, J = 5.7 Hz, 3H), 3.72 (d, J = 9.5 Hz, 1H), 3.54 – 3.12 (m, 6H), 2.29 – 2.05 (m, 1H), 1.77 (s, 1H), 1.46 (s, 9H), 1.07 – 0.88 (m, 6H). <sup>13</sup>C NMR (101 MHz, Chloroform-d) δ 169.67, 169.61, 167.25, 154.00, 84.75, 84.30, 78.21, 71.83, 58.35, 57.82, 57.66, 51.36, 51.23, 50.18, 50.09, 28.73, 28.53, 26.34, 17.28, 15.60. HRMS (ESI) cald. For (M+Na)<sup>+</sup> C<sub>16</sub>H<sub>30</sub>N<sub>2</sub>O<sub>7</sub>: 385.1945, found, 385.1941.

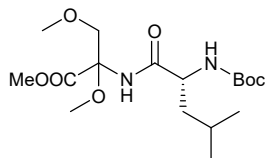**Methyl 2-((R)-2-((tert-butoxycarbonyl)amino)-4-methylpentanamido)-2,3-dimethoxypropanoate (3aj):**

Colorless oil (Yield: 60%, 45.15 mg). <sup>1</sup>H NMR (400 MHz, Chloroform-d) δ 7.42 (s, 1H), 5.11 – 4.84 (m, 1H), 4.14 (s, 1H), 4.03 (dd, J = 23.5, 9.5 Hz, 1H), 3.83 (d, J = 3.4 Hz, 3H), 3.72 (d, J = 9.7 Hz, 1H), 3.34 (dd, J = 30.6, 3.3 Hz, 6H), 1.71 (s, 2H), 1.45 (s, 10H), 0.95 (t, J = 5.8 Hz, 6H). <sup>13</sup>C NMR (101 MHz, Chloroform-d) δ 172.46, 169.33, 169.21, 155.72, 86.57, 86.25, 80.27, 73.68, 73.25, 59.75, 59.66, 53.19, 53.12, 51.92, 40.79, 40.64, 28.22, 24.73, 24.69, 22.92, 22.87, 21.84. HRMS (ESI) cald. For (M+Na)<sup>+</sup> C<sub>17</sub>H<sub>32</sub>N<sub>2</sub>O<sub>7</sub>: 399.2101, found, 399.2102.

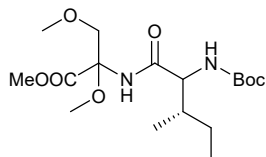**Methyl 2-((3S)-2-((tert-butoxycarbonyl)amino)-3-methylpentanamido)-2,3-dimethoxypropanoate (3ak):**

Colorless oil (Yield: 50%, 37.65 mg). <sup>1</sup>H NMR (400 MHz, Chloroform-d) δ 7.18 (d, J = 33.0 Hz, 1H), 5.05 (dd, J = 22.7, 8.3 Hz, 1H), 4.02 (dd, J = 44.9, 9.2 Hz, 2H), 3.80 (d, J = 5.9 Hz, 3H), 3.68 (d, J = 9.4 Hz, 1H), 3.45 – 3.15 (m, 6H), 1.98 (s, 2H), 1.88 (ddq, J = 13.4, 6.9, 4.3, 3.6 Hz, 1H), 1.42 (s, 9H), 1.00 – 0.84 (m, 6H). <sup>13</sup>C NMR (101 MHz, Chloroform-d) δ 169.68, 167.25, 153.94, 84.26, 78.19, 71.84, 71.04, 57.81, 51.35, 50.16, 35.15, 26.35, 22.77, 13.54, 9.59. HRMS (ESI) cald. For (M+Na)<sup>+</sup> C<sub>17</sub>H<sub>32</sub>N<sub>2</sub>O<sub>7</sub>: 399.2101, found, 399.2109.

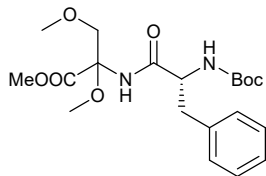**Methyl 2-((R)-2-((tert-butoxycarbonyl)amino)-3-phenylpropanamido)-2,3-dimethoxypropanoate (3ai):**

Colorless oil (Yield: 67%, 55.01 mg). <sup>1</sup>H NMR (400 MHz, Chloroform-d) δ 7.34 – 7.07 (m, 6H),

5.04 (s, 1H), 4.42 (s, 1H), 3.98 (dd, J = 15.2, 9.5 Hz, 1H), 3.82 (d, J = 4.5 Hz, 3H), 3.64 (dd, J = 36.8, 9.6 Hz, 1H), 3.32 (d, J = 6.4 Hz, 3H), 3.20 (d, J = 8.7 Hz, 3H), 3.10 (d, J = 6.1 Hz, 2H), 1.42 (s, 9H). <sup>13</sup>C NMR (101 MHz, Chloroform-d) δ 171.13, 171.09, 169.14, 169.03, 155.43, 136.44, 136.35, 129.42, 128.68, 127.02, 86.53, 86.26, 73.57, 73.38, 59.68, 59.64, 56.00, 53.18, 53.13, 51.99, 37.90, 37.64, 28.21. HRMS (ESI) cald. For (M+Na)<sup>+</sup> C<sub>20</sub>H<sub>30</sub>N<sub>2</sub>O<sub>7</sub>: 433.1945, found, 433.1940.

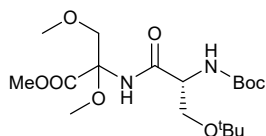

**Methyl 2-((R)-3-(tert-butoxy)-2-((tert-butoxycarbonyl)amino)propanamido)-2,3-dimethoxypropanoate (3am):**

Colorless oil (Yield: 64%, 52.03 mg). <sup>1</sup>H NMR (400 MHz, Chloroform-d) δ 7.91 (d, J = 24.1 Hz, 1H), 5.48 (s, 1H), 4.23 (s, 1H), 4.04 (d, J = 9.4 Hz, 1H), 3.94 – 3.71 (m, 5H), 3.43 (s, 1H), 3.38 (s, 3H), 3.30 (s, 3H), 1.47 (s, 9H), 1.22 (s, 9H). <sup>13</sup>C NMR (101 MHz, Chloroform-d) δ 170.50, 170.38, 169.12, 169.05, 155.29, 86.57, 85.95, 79.90, 74.03, 73.96, 73.55, 61.69, 61.52, 59.60, 54.51, 54.33, 52.99, 51.80, 28.18, 27.25, 27.18. HRMS (ESI) cald. For (M+K)<sup>+</sup> C<sub>18</sub>H<sub>34</sub>N<sub>2</sub>O<sub>8</sub>: 429.1997, found, 429.1999.

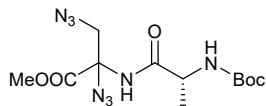

**Methyl (S)-2,3-diazido-2-((R)-2-((tert-butoxycarbonyl)amino)propanamido)propanoate (3bb):**

yellow oil (Yield: 43%, 30.65 mg). <sup>1</sup>H NMR (400 MHz, Chloroform-d) δ 7.90 (d, J = 21.5 Hz, 1H), 5.03 (s, 1H), 4.24 (s, 1H), 3.99 – 3.92 (m, 1H), 3.87 (s, 3H), 3.53 (dd, J = 12.5, 7.8 Hz, 1H), 1.45 (s, 9H), 1.36 (dd, J = 7.0, 2.2 Hz, 3H). <sup>13</sup>C NMR (101 MHz, Chloroform-d) δ 171.63, 165.10, 165.07, 154.03, 79.00, 73.38, 52.29, 52.06, 51.96, 47.91, 26.32, 15.33. HRMS (ESI) cald. For (M+Na)<sup>+</sup> C<sub>12</sub>H<sub>20</sub>N<sub>8</sub>O<sub>5</sub>: 379.1448, found, 379.1442.

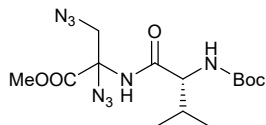

**Methyl (S)-2,3-diazido-2-((R)-2-((tert-butoxycarbonyl)amino)-3-methylbutanamido)propanoate (3bc):**

Colorless liquid (Yield: 36%, 27.68 mg). <sup>1</sup>H NMR (400 MHz, Chloroform-d) δ 7.43 (s, 1H), 4.97 (s, 1H), 3.88 (s, 3H), 3.64 – 3.49 (m, 1H), 2.18 (tt, J = 13.3, 6.7 Hz, 1H), 1.67 (s, 1H), 1.46 (s, 9H), 1.25 (s, 1H), 1.02 – 0.94 (m, 6H). <sup>13</sup>C NMR (101 MHz, Chloroform-d) δ 172.70, 172.58, 166.93, 156.17, 80.54, 75.29, 59.74, 53.85, 30.24, 30.14, 28.22, 19.18, 19.10, 17.82, 17.73. HRMS (ESI) cald. For (M+Na)<sup>+</sup> C<sub>14</sub>H<sub>24</sub>N<sub>8</sub>O<sub>5</sub>: 407.1761, found, 407.1765.



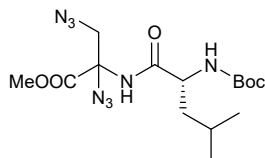

**Methyl (S)-2,3-diazido-2-((R)-2-((tert-butoxycarbonyl)amino)-4-methylpentanamido)propanoate (3bd):**

Yellow oil (Yield: 44%, 35.06 mg). <sup>1</sup>H NMR (400 MHz, Chloroform-d) δ 7.93 (s, 1H), 4.95 (s, 1H), 4.19 (s, 1H), 3.95 (d, J = 12.5 Hz, 1H), 3.88 (s, 3H), 3.54 (dd, J = 12.4, 9.0 Hz, 1H), 1.74 – 1.64 (m, 2H), 1.46 (d, J = 4.9 Hz, 10H), 0.99 – 0.91 (m, 6H). <sup>13</sup>C NMR (101 MHz, Chloroform-d) δ 173.74, 166.89, 156.12, 80.54, 75.26, 60.40, 53.75, 52.64, 40.36, 28.17, 24.61, 22.72. HRMS (ESI) cald. For (M+Na)<sup>+</sup> C<sub>15</sub>H<sub>26</sub>N<sub>8</sub>O<sub>5</sub>: 421.1918, found, 421.1918.

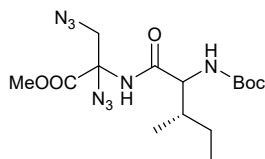

**Methyl 2,3-diazido-2-((3S)-2-((tert-butoxycarbonyl)amino)-3-methylpentanamido)propanoate (3be):**

Yellow oil (Yield: 36%, 28.69 mg). <sup>1</sup>H NMR (400 MHz, Chloroform-d) δ 7.67 (s, 1H), 5.10 (s, 1H), 3.99 (s, 1H), 3.86 (s, 4H), 3.54 (d, J = 12.5 Hz, 1H), 1.87 (s, 1H), 1.44 (s, 10H), 1.13 (s, 1H), 0.93 (dt, J = 21.4, 7.1 Hz, 6H). <sup>13</sup>C NMR (101 MHz, Chloroform-d) δ 172.67, 172.55, 166.88, 156.05, 80.56, 75.27, 59.14, 54.43, 53.85, 36.44, 28.23, 24.72, 24.69, 15.44, 15.37, 11.22. HRMS (ESI) cald. For (M+Na)<sup>+</sup> C<sub>15</sub>H<sub>26</sub>N<sub>8</sub>O<sub>5</sub>: 421.1918, found, 421.1917.

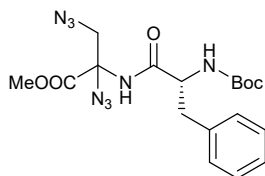

**Methyl (S)-2,3-diazido-2-((R)-2-((tert-butoxycarbonyl)amino)-3-phenylpropanamido)propanoate (3bf):**

Yellow oil (Yield: 40%, 34.60 mg). <sup>1</sup>H NMR (400 MHz, Chloroform-d) δ 7.47 – 7.16 (m, 6H), 5.05 (d, J = 7.7 Hz, 1H), 4.52 – 4.29 (m, 1H), 3.96 – 3.73 (m, 4H), 3.54 – 3.30 (m, 1H), 3.08 (s, 2H), 1.43 (s, 9H). <sup>13</sup>C NMR (101 MHz, Chloroform-d) δ 172.21, 172.14, 166.81, 166.76, 155.71, 136.17, 136.08, 129.33, 129.27, 128.84, 128.76, 127.18, 127.14, 80.87, 75.28, 75.23, 55.60, 54.09, 37.62, 29.70, 28.19. HRMS (ESI) cald. For (M+Na)<sup>+</sup> C<sub>18</sub>H<sub>24</sub>N<sub>8</sub>O<sub>5</sub>: 455.1761, found, 455.1768.

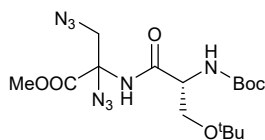

**Methyl (S)-2,3-diazido-2-((R)-3-(tert-butoxy)-2-((tert-butoxycarbonyl)amino)pentanamido)propanoate:**

**butoxycarbonyl)amino)propanamido)propanoate (3bg):**

Yellow oil (Yield: 38%, 32.56 mg). <sup>1</sup>H NMR (400 MHz, Chloroform-d) δ 8.22 (s, 1H), 5.43 (s, 1H), 4.27 (s, 1H), 4.07 – 3.94 (m, 1H), 3.93 – 3.85 (m, 3H), 3.81 (s, 1H), 3.54 (t, J = 12.6 Hz, 1H), 3.40 (t, J = 7.9 Hz, 1H), 1.46 (s, 9H), 1.31 – 1.20 (m, 9H). <sup>13</sup>C NMR (101 MHz, Chloroform-d) δ 171.51, 166.89, 166.83, 155.31, 80.16, 75.43, 75.31, 74.60, 74.52, 61.58, 61.43, 54.14, 53.94, 53.62, 28.23, 27.27, 27.21. HRMS (ESI) calcd. For (M+Na)<sup>+</sup> C<sub>16</sub>H<sub>28</sub>N<sub>8</sub>O<sub>6</sub>: 451.2024, found, 451.2023.

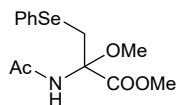**Methyl 2-acetamido-2-methoxy-3-(phenylselanyl)propanoate (3ca):**

White solid (Yield: 92 %, 60.72 mg). <sup>1</sup>H NMR (400 MHz, Chloroform-d) δ 7.50 (dd, J = 6.5, 3.1 Hz, 2H), 7.28 – 7.16 (m, 3H), 6.73 (s, 1H), 4.19 (d, J = 12.9 Hz, 1H), 3.58 (s, 3H), 3.26 (d, J = 13.0 Hz, 1H), 3.17 (s, 3H), 1.76 (s, 3H). <sup>13</sup>C NMR (101 MHz, Chloroform-d) δ 169.69, 169.46, 133.89, 129.13, 128.62, 127.63, 88.26, 53.07, 52.24, 31.69, 23.58. HRMS (ESI) calcd. For (M+Na)<sup>+</sup> C<sub>13</sub>H<sub>17</sub>NO<sub>4</sub>Se: 348.0274, found, 348.0277.

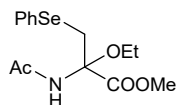**Methyl 2-acetamido-2-ethoxy-3-(phenylselanyl)propanoate (3cb):**

White solid (Yield: 70 %, 48.20 mg). <sup>1</sup>H NMR (400 MHz, Chloroform-d) δ 7.52 (dd, J = 6.5, 3.0 Hz, 2H), 7.30 – 7.16 (m, 3H), 6.75 (s, 1H), 4.24 (d, J = 13.0 Hz, 1H), 3.59 (s, 3H), 3.52 – 3.40 (m, 1H), 3.32 – 3.20 (m, 2H), 1.77 (s, 3H), 1.14 (t, J = 7.0 Hz, 3H). <sup>13</sup>C NMR (101 MHz, Chloroform-d) δ 169.78, 169.46, 133.76, 129.06, 128.82, 127.50, 87.62, 60.46, 52.93, 32.17, 23.60, 15.04. HRMS (ESI) calcd. For (M+Na)<sup>+</sup> C<sub>14</sub>H<sub>19</sub>NO<sub>4</sub>Se: 362.0431, found, 362.0437.

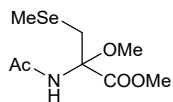**Methyl 2-acetamido-2-methoxy-3-(methylselanyl)propanoate (3cc):**

White solid (Yield: 58 %, 31.11 mg). <sup>1</sup>H NMR (400 MHz, Chloroform-d) δ 6.88 (s, 1H), 3.79 (s, 3H), 3.62 (d, J = 13.0 Hz, 1H), 3.24 (s, 3H), 2.92 (d, J = 12.9 Hz, 1H), 2.05 (s, 3H), 1.99 (s, 3H). <sup>13</sup>C NMR (101 MHz, Chloroform-d) δ 169.77, 169.63, 87.46, 53.18, 52.35, 30.56, 23.77, 5.78. HRMS (ESI) calcd. For (M+Na)<sup>+</sup> C<sub>8</sub>H<sub>15</sub>NO<sub>4</sub>Se: 286.0118, found, 286.0114.

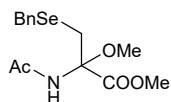**Methyl 2-acetamido-3-(benzylselanyl)-2-methoxypropanoate (3cd):**

White solid (Yield: 51 %, 35.12 mg). <sup>1</sup>H NMR (400 MHz, Chloroform-d) δ 7.30 (d, J = 6.2 Hz, 4H), 7.22 (td, J = 6.0, 2.6 Hz, 1H), 6.70 (s, 1H), 3.81 (s, 2H), 3.77 (s, 3H), 3.59 (d, J = 12.8 Hz,

1H), 3.30 (s, 3H), 2.91 (d, J = 12.8 Hz, 1H), 2.01 (s, 3H). <sup>13</sup>C NMR (101 MHz, Chloroform-d) δ 169.74, 169.49, 138.95, 129.03, 128.89, 128.67, 128.45, 127.04, 86.58, 53.14, 52.52, 30.29, 28.49, 23.59. HRMS (ESI) cald. For (M+Na)<sup>+</sup> C<sub>14</sub>H<sub>19</sub>NO<sub>4</sub>Se: 362.0431, found, 362.0450.

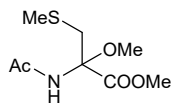

**Methyl 2-acetamido-2-methoxy-3-(methylthio)propanoate (3ce):**

White solid (Yield: 40 %, 17.69 mg). <sup>1</sup>H NMR (400 MHz, Chloroform-d) δ 6.91 (s, 1H), 3.79 (s, 3H), 3.53 (d, J = 14.0 Hz, 1H), 3.24 (s, 3H), 2.93 (d, J = 14.0 Hz, 1H), 2.10 (s, 3H), 2.06 (s, 3H). <sup>13</sup>C NMR (101 MHz, Chloroform-d) δ 169.83, 169.79, 87.54, 53.19, 52.13, 39.35, 23.72, 16.87. HRMS (ESI) cald. For (M+Na)<sup>+</sup> C<sub>8</sub>H<sub>15</sub>NO<sub>4</sub>S: 244.0614, found, 244.0614.

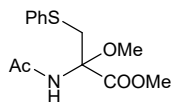

**Methyl 2-acetamido-2-methoxy-3-(phenylthio)propanoate (3cf):**

White solid (Yield: 45 %, 25.50 mg). <sup>1</sup>H NMR (400 MHz, Chloroform-d) δ 7.39 – 7.33 (m, 2H), 7.28 – 7.12 (m, 3H), 6.66 (s, 1H), 4.26 (d, J = 14.1 Hz, 1H), 3.63 (s, 3H), 3.29 (d, J = 14.1 Hz, 1H), 3.13 (s, 3H), 1.70 (s, 3H). <sup>13</sup>C NMR (101 MHz, Chloroform-d) δ 169.73, 169.61, 134.35, 131.64, 128.98, 127.19, 88.53, 53.19, 51.93, 37.87, 23.59. HRMS (ESI) cald. For (M+Na)<sup>+</sup> C<sub>13</sub>H<sub>17</sub>NO<sub>4</sub>S: 306.0770, found, 306.0778.

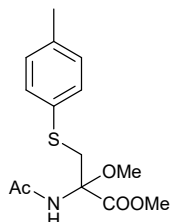

**Methyl 2-acetamido-2-methoxy-3-(p-tolylthio)propanoate (3cg):**

White solid (Yield: 50 %, 29.74 mg). <sup>1</sup>H NMR (400 MHz, Chloroform-d) δ 7.30 (d, J = 7.9 Hz, 2H), 7.09 (d, J = 7.8 Hz, 2H), 6.70 (s, 1H), 4.24 (d, J = 14.1 Hz, 1H), 3.68 (s, 3H), 3.28 (d, J = 14.1 Hz, 1H), 3.17 (s, 3H), 2.30 (s, 3H), 1.74 (s, 3H). <sup>13</sup>C NMR (101 MHz, Chloroform-d) δ 169.69, 169.64, 137.33, 132.09, 130.69, 129.70, 88.53, 53.15, 51.89, 38.36, 23.54, 21.02. HRMS (ESI) cald. For (M+Na)<sup>+</sup> C<sub>14</sub>H<sub>19</sub>NO<sub>4</sub>S: 320.0927, found, 320.0921.

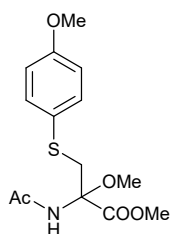

**Methyl 2-acetamido-2-methoxy-3-((4-methoxyphenyl)thio)propanoate (3ch):**

White solid (Yield: 56 %, 35.10 mg). <sup>1</sup>H NMR (400 MHz, Chloroform-d) δ 7.33 (d, J = 8.4 Hz, 2H), 6.79 (d, J = 8.4 Hz, 2H), 6.71 (s, 1H), 4.17 (d, J = 14.1 Hz, 1H), 3.75 (s, 3H), 3.65 (s, 3H),

3.19 (d,  $J = 14.1$  Hz, 1H), 3.13 (s, 3H), 1.74 (s, 3H).  $^{13}\text{C}$  NMR (101 MHz, Chloroform- $d$ )  $\delta$  169.68, 169.66, 159.40, 134.45, 124.68, 114.54, 88.55, 55.37, 53.18, 51.82, 38.97, 23.62. HRMS (ESI) cald. For  $(\text{M}+\text{Na})^+$   $\text{C}_{14}\text{H}_{19}\text{NO}_5\text{S}$ : 336.0876, found, 336.0873.

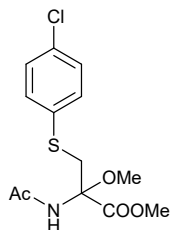

**Methyl 2-acetamido-3-((4-chlorophenyl)thio)-2-methoxypropanoate (3ci):**

White solid (Yield: 40 %, 25.42 mg).  $^1\text{H}$  NMR (400 MHz, Chloroform- $d$ )  $\delta$  7.38 – 7.34 (m, 2H), 7.31 – 7.24 (m, 2H), 6.72 (s, 1H), 4.32 (d,  $J = 14.1$  Hz, 1H), 3.73 (s, 3H), 3.33 (d,  $J = 14.1$  Hz, 1H), 3.19 (s, 3H), 1.81 (s, 3H).  $^{13}\text{C}$  NMR (101 MHz, Chloroform- $d$ )  $\delta$  169.70, 169.52, 133.30, 132.93, 132.90, 129.03, 88.48, 53.28, 51.94, 37.96, 23.62. HRMS (ESI) cald. For  $(\text{M}+\text{Na})^+$   $\text{C}_{14}\text{H}_{16}\text{NO}_4\text{SCl}$ : 352.0380, found, 352.0389.

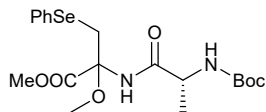

**Methyl 2-((R)-2-((tert-butoxycarbonyl)amino)propanamido)-2-methoxy-3-(phenylselanyl)propanoate (3cj):**

Yellow oil (Yield: 76 %, 69.83 mg).  $^1\text{H}$  NMR (400 MHz, Chloroform- $d$ )  $\delta$  7.57 – 7.45 (m, 3H), 7.28 – 7.20 (m, 3H), 4.92 (dd,  $J = 69.1, 7.3$  Hz, 1H), 4.18 (dd,  $J = 24.8, 12.9$  Hz, 1H), 3.57 (d,  $J = 13.6$  Hz, 3H), 3.34 (t,  $J = 12.7$  Hz, 1H), 3.20 (d,  $J = 4.8$  Hz, 3H), 1.46 (d,  $J = 8.4$  Hz, 9H), 1.24 (dd,  $J = 7.3, 2.0$  Hz, 3H).  $^{13}\text{C}$  NMR (101 MHz, Chloroform- $d$ )  $\delta$  172.31, 172.12, 169.14, 169.04, 155.44, 133.71, 133.67, 129.05, 128.93, 128.87, 127.53, 88.12, 87.76, 80.21, 52.98, 52.92, 52.26, 52.23, 50.40, 32.42, 31.95, 28.30, 28.28, 17.64, 17.47. HRMS (ESI) cald. For  $(\text{M}+\text{Na})^+$   $\text{C}_{19}\text{H}_{28}\text{N}_2\text{O}_6\text{Se}$ : 477.1064, found, 477.1062.

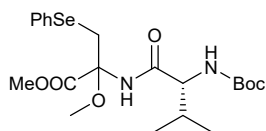

**Methyl 2-((R)-2-((tert-butoxycarbonyl)amino)-3-methylbutanamido)-2-methoxy-3-(phenylselanyl)propanoate (3ck):**

Yellow oil (Yield: 58 %, 56.55 mg).  $^1\text{H}$  NMR (400 MHz, Chloroform- $d$ )  $\delta$  7.57 – 7.49 (m, 2H), 7.36 (d,  $J = 8.0$  Hz, 1H), 7.31 – 7.25 (m, 3H), 5.02 (t,  $J = 9.1$  Hz, 1H), 4.12 (dd,  $J = 12.8, 7.5$  Hz, 1H), 4.02 – 3.85 (m, 1H), 3.54 (d,  $J = 14.6$  Hz, 3H), 3.39 (dd,  $J = 12.8, 9.0$  Hz, 1H), 3.26 (s, 3H), 2.23 – 2.10 (m, 1H), 1.49 (s, 9H), 1.06 – 0.87 (m, 6H).  $^{13}\text{C}$  NMR (101 MHz, Chloroform- $d$ )  $\delta$  171.44, 171.36, 169.04, 155.84, 133.62, 133.54, 129.16, 129.11, 128.98, 127.65, 127.57, 87.26,

80.11, 60.30, 60.10, 52.85, 52.83, 52.47, 52.41, 33.39, 33.29, 30.35, 30.24, 29.69, 29.35, 28.30, 19.46, 19.37, 17.53. HRMS (ESI) calcd. For (M+Na)<sup>+</sup> C<sub>21</sub>H<sub>32</sub>N<sub>2</sub>O<sub>6</sub>Se: 505.1377, found, 505.1377.

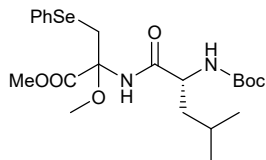

**Methyl 2-((R)-2-((tert-butoxycarbonyl)amino)-4-methylpentanamido)-2-methoxy-3-(phenylselanyl)propanoate (3cl):**

White solid (Yield: 90 %, 90.27 mg). <sup>1</sup>H NMR (400 MHz, Chloroform-d) δ 7.51 (ddt, J = 6.6, 4.5, 2.9 Hz, 2H), 7.42 (s, 1H), 7.27 – 7.20 (m, 3H), 4.72 (dd, J = 42.9, 7.8 Hz, 1H), 4.15 (t, J = 12.5 Hz, 1H), 4.02 (d, J = 9.1 Hz, 1H), 3.54 (d, J = 8.0 Hz, 3H), 3.33 (t, J = 12.9 Hz, 1H), 3.20 (d, J = 4.3 Hz, 3H), 1.73 – 1.52 (m, 2H), 1.44 (d, J = 7.1 Hz, 9H), 1.37 – 1.22 (m, 1H), 0.95 – 0.87 (m, 6H). <sup>13</sup>C NMR (101 MHz, Chloroform-d) δ 172.28, 172.16, 169.14, 169.07, 155.66, 133.60, 133.57, 129.07, 127.52, 87.73, 87.58, 80.21, 53.47, 52.91, 52.36, 52.31, 40.32, 32.72, 32.50, 28.28, 24.78, 24.69, 23.04, 22.99. HRMS (ESI) calcd. For (M+Na)<sup>+</sup> C<sub>22</sub>H<sub>34</sub>N<sub>2</sub>O<sub>6</sub>Se: 519.1533, found, 519.1533.

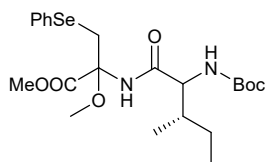

**Methyl 2-((3S)-2-((tert-butoxycarbonyl)amino)-3-methylpentanamido)-2-methoxy-3-(phenylselanyl)propanoate (3cm):**

White solid (Yield: 63 %, 63.19 mg). <sup>1</sup>H NMR (400 MHz, Chloroform-d) δ 7.56 – 7.44 (m, 2H), 7.36 (s, 1H), 7.23 (ddq, J = 5.9, 4.2, 1.8 Hz, 3H), 5.04 (t, J = 9.0 Hz, 1H), 4.06 (dd, J = 25.0, 12.8 Hz, 1H), 3.98 – 3.82 (m, 1H), 3.49 (d, J = 20.2 Hz, 3H), 3.35 (dd, J = 12.8, 6.3 Hz, 1H), 3.22 (s, 3H), 1.89 – 1.78 (m, 1H), 1.51 (d, J = 3.6 Hz, 1H), 1.44 (s, 9H), 1.11 (ddt, J = 14.0, 9.5, 7.0 Hz, 1H), 0.91 (ddd, J = 16.4, 14.0, 7.1 Hz, 6H). <sup>13</sup>C NMR (101 MHz, Chloroform-d) δ 171.45, 171.38, 168.99, 155.76, 133.63, 133.58, 133.52, 129.17, 129.09, 129.02, 127.62, 127.55, 87.15, 87.11, 80.03, 59.68, 59.52, 52.79, 52.43, 52.34, 36.82, 36.70, 33.39, 28.29, 24.71, 24.62, 15.71, 15.52, 11.49, 11.45. HRMS (ESI) calcd. For (M+Na)<sup>+</sup> C<sub>22</sub>H<sub>34</sub>N<sub>2</sub>O<sub>6</sub>Se: 519.1533, found, 519.1539.

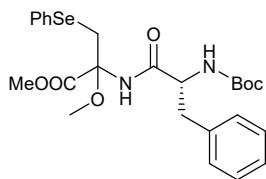

**Methyl 2-((R)-2-((tert-butoxycarbonyl)amino)-3-phenylpropanamido)-2-methoxy-3-(phenylselanyl)propanoate (3cn):**

White solid (Yield: 75 %, 80.33 mg). <sup>1</sup>H NMR (400 MHz, Chloroform-d) δ 7.48 – 7.43 (m, 2H), 7.38 (s, 1H), 7.30 – 7.12 (m, 9H), 4.78 (d, J = 7.2 Hz, 1H), 4.22 – 3.99 (m, 2H), 3.50 (d, J = 8.1 Hz,

3H), 3.24 (dd,  $J = 28.5, 12.9$  Hz, 1H), 3.07 (d,  $J = 32.6$  Hz, 3H), 2.94 (d,  $J = 6.9$  Hz, 1H), 1.37 (d,  $J = 2.0$  Hz, 9H).  $^{13}\text{C}$  NMR (101 MHz, Chloroform- $d$ )  $\delta$  171.08, 170.88, 168.97, 168.96, 155.39, 136.56, 136.46, 133.66, 133.65, 129.36, 129.27, 129.08, 128.95, 128.74, 127.59, 127.55, 127.02, 127.00, 87.82, 87.44, 80.40, 55.90, 52.91, 52.41, 52.34, 37.64, 37.03, 32.98, 32.48, 29.71, 28.26, 28.24. HRMS (ESI) cald. For  $(\text{M}+\text{Na})^+$   $\text{C}_{25}\text{H}_{32}\text{N}_2\text{O}_6\text{Se}$ : 553.1377, found, 553.1375.

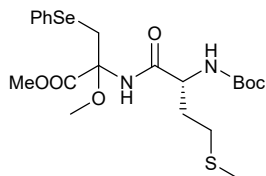

**Methyl 2-((R)-2-((tert-butoxycarbonyl)amino)-4-(methylthio)butanamido)-2-methoxy-3-(phenylselanyl)propanoate (3co):**

Colorless oil (Yield: 65 %, 67.54 mg).  $^1\text{H}$  NMR (400 MHz, Chloroform- $d$ )  $\delta$  7.57 – 7.45 (m, 3H), 7.24 (h,  $J = 2.3$  Hz, 3H), 5.04 (dd,  $J = 56.6, 8.0$  Hz, 1H), 4.20 – 4.08 (m, 2H), 3.53 (d,  $J = 25.8$  Hz, 3H), 3.33 (dd,  $J = 19.1, 12.9$  Hz, 1H), 3.19 (s, 3H), 2.55 (tt,  $J = 14.0, 6.8$  Hz, 2H), 2.09 (d,  $J = 12.0$  Hz, 3H), 2.02 – 1.67 (m, 2H), 1.44 (d,  $J = 9.4$  Hz, 9H).  $^{13}\text{C}$  NMR (101 MHz, Chloroform- $d$ )  $\delta$  171.31, 171.15, 169.02, 168.96, 155.55, 133.72, 129.09, 128.86, 127.62, 87.90, 87.85, 80.31, 53.86, 52.99, 52.95, 52.39, 52.38, 32.46, 32.40, 30.87, 30.23, 30.21, 28.31, 28.28, 15.36, 15.32. HRMS (ESI) cald. For  $(\text{M}+\text{Na})^+$   $\text{C}_{21}\text{H}_{32}\text{N}_2\text{O}_6\text{SSe}$ : 537.1098, found, 537.1098.

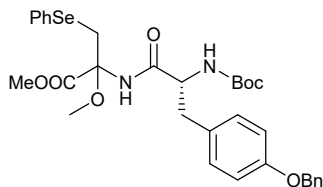

**Methyl 2-((R)-3-(4-(benzyloxy)phenyl)-2-((tert-butoxycarbonyl)amino)propanamido)-2-methoxy-3-(phenylselanyl)propanoate (3cp):**

Yellow oil (Yield: 43 %, 55.18 mg).  $^1\text{H}$  NMR (400 MHz, Chloroform- $d$ )  $\delta$  7.49 (dtd,  $J = 4.8, 4.0, 2.4$  Hz, 2H), 7.43 – 7.29 (m, 6H), 7.27 – 7.20 (m, 3H), 7.15 – 7.09 (m, 2H), 6.93 – 6.89 (m, 2H), 5.03 (s, 2H), 4.84 (d,  $J = 6.4$  Hz, 1H), 4.24 – 4.00 (m, 2H), 3.54 (d,  $J = 9.9$  Hz, 3H), 3.29 (dd,  $J = 18.8, 12.9$  Hz, 1H), 3.12 (d,  $J = 30.1$  Hz, 3H), 2.99 – 2.90 (m, 2H), 1.43 (s, 9H).  $^{13}\text{C}$  NMR (101 MHz, Chloroform- $d$ )  $\delta$  171.20, 171.00, 168.99, 157.87, 157.84, 155.42, 136.98, 133.68, 133.64, 130.45, 130.37, 129.10, 128.97, 128.75, 128.61, 128.00, 127.60, 127.56, 127.46, 127.45, 115.12, 115.11, 87.78, 87.34, 80.38, 70.01, 56.02, 52.91, 52.44, 52.35, 36.76, 36.22, 33.13, 32.58, 29.72, 28.29, 28.28. HRMS (ESI) cald. For  $(\text{M}+\text{Na})^+$   $\text{C}_{32}\text{H}_{38}\text{N}_2\text{O}_7\text{Se}$ : 659.1796, found, 659.1700.

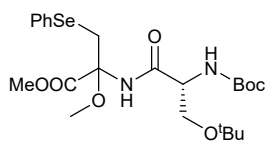

**Methyl 2-((R)-3-(tert-butoxy)-2-((tert-butoxycarbonyl)amino)propanamido)-2-methoxy-3-**

**(phenylselanyl)propanoate (3cq):**

Yellow oil (Yield: 40 %, 42.52 mg).  $^1\text{H}$  NMR (400 MHz, Chloroform- $d$ )  $\delta$  7.97 (d,  $J$  = 54.0 Hz, 1H), 7.48 (ddd,  $J$  = 5.6, 3.7, 2.0 Hz, 2H), 7.24 – 7.19 (m, 3H), 5.34 (t,  $J$  = 6.2 Hz, 1H), 4.25 – 4.10 (m, 1H), 3.73 (ddd,  $J$  = 17.0, 10.0, 3.7 Hz, 2H), 3.52 (d,  $J$  = 35.7 Hz, 3H), 3.37 – 3.23 (m, 2H), 3.17 (d,  $J$  = 15.3 Hz, 3H), 1.45 (d,  $J$  = 6.4 Hz, 9H), 1.19 (d,  $J$  = 3.0 Hz, 9H).  $^{13}\text{C}$  NMR (101 MHz, Chloroform- $d$ )  $\delta$  170.50, 170.18, 168.98, 168.96, 155.25, 133.91, 133.48, 129.14, 129.02, 128.95, 128.67, 127.65, 127.45, 88.54, 87.69, 80.05, 79.85, 74.17, 74.11, 61.60, 54.57, 54.43, 52.90, 52.79, 52.36, 52.22, 32.86, 31.56, 28.32, 27.41, 27.39. HRMS (ESI) calcd. For  $(\text{M}+\text{Na})^+$   $\text{C}_{23}\text{H}_{36}\text{N}_2\text{O}_7\text{Se}$ : 519.1533, found, 519.1530.

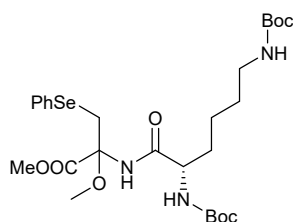

**Methyl 2-((S)-2,6-bis((tert-butoxycarbonyl)amino)hexanamido)-2-methoxy-3-(phenylselanyl)propanoate (3cr):**

Colorless liquid; (Yield: 40 %, 49.33 mg).  $^1\text{H}$  NMR (400 MHz, Chloroform- $d$ )  $\delta$  7.55 – 7.44 (m, 3H), 7.22 (td,  $J$  = 3.6, 1.8 Hz, 3H), 5.09 (dd,  $J$  = 25.9, 7.4 Hz, 1H), 4.65 (d,  $J$  = 6.0 Hz, 1H), 4.11 (dd,  $J$  = 21.7, 12.9 Hz, 1H), 3.93 (qd,  $J$  = 8.6, 5.8, 4.3 Hz, 1H), 3.52 (d,  $J$  = 10.0 Hz, 3H), 3.32 (dd,  $J$  = 12.8, 6.4 Hz, 1H), 3.19 (d,  $J$  = 6.1 Hz, 3H), 3.08 (p,  $J$  = 6.5 Hz, 2H), 1.42 (dd,  $J$  = 7.3, 3.7 Hz, 24H).  $^{13}\text{C}$  NMR (101 MHz, Chloroform- $d$ )  $\delta$  171.90, 171.76, 169.07, 169.03, 156.23, 156.21, 155.79, 133.66, 133.61, 129.08, 129.03, 127.54, 87.78, 87.41, 80.20, 79.14, 54.88, 52.93, 52.90, 52.37, 52.31, 39.80, 32.96, 32.40, 31.06, 29.70, 29.68, 28.44, 28.30, 22.56. HRMS (ESI) calcd. For  $(\text{M}+\text{Na})^+$   $\text{C}_{27}\text{H}_{32}\text{N}_3\text{O}_8\text{Se}$ : 634.2167, found, 634.2169.

- [1] R. A. Serwa, J.-M. Swiecicki, D. Homann, C. P. R. Hackenberger, Phosphoramidate-peptide synthesis by solution- and solid-phase Staudinger-phosphite reactions. *J. Pept. Sci.* **2010**, 16, 563–567.
- [2] Alam J, Keller T H, Loh T P. Functionalization of peptides and proteins by Mukaiyama aldol reaction. *J. Am. Chem. Soc.* **2010**, 132, 9546-9548.
- [3] R. A. Aycock, D. B. Vogt and N. T. Jui, A practical and scalable system for heteroaryl amino acid synthesis. *Chem. Sci.*, **2017**, 8, 7998-8003



## 5. NMR spectra of all products

$^1\text{H}$  and  $^{13}\text{C}$  NMR spectra of **3aa**

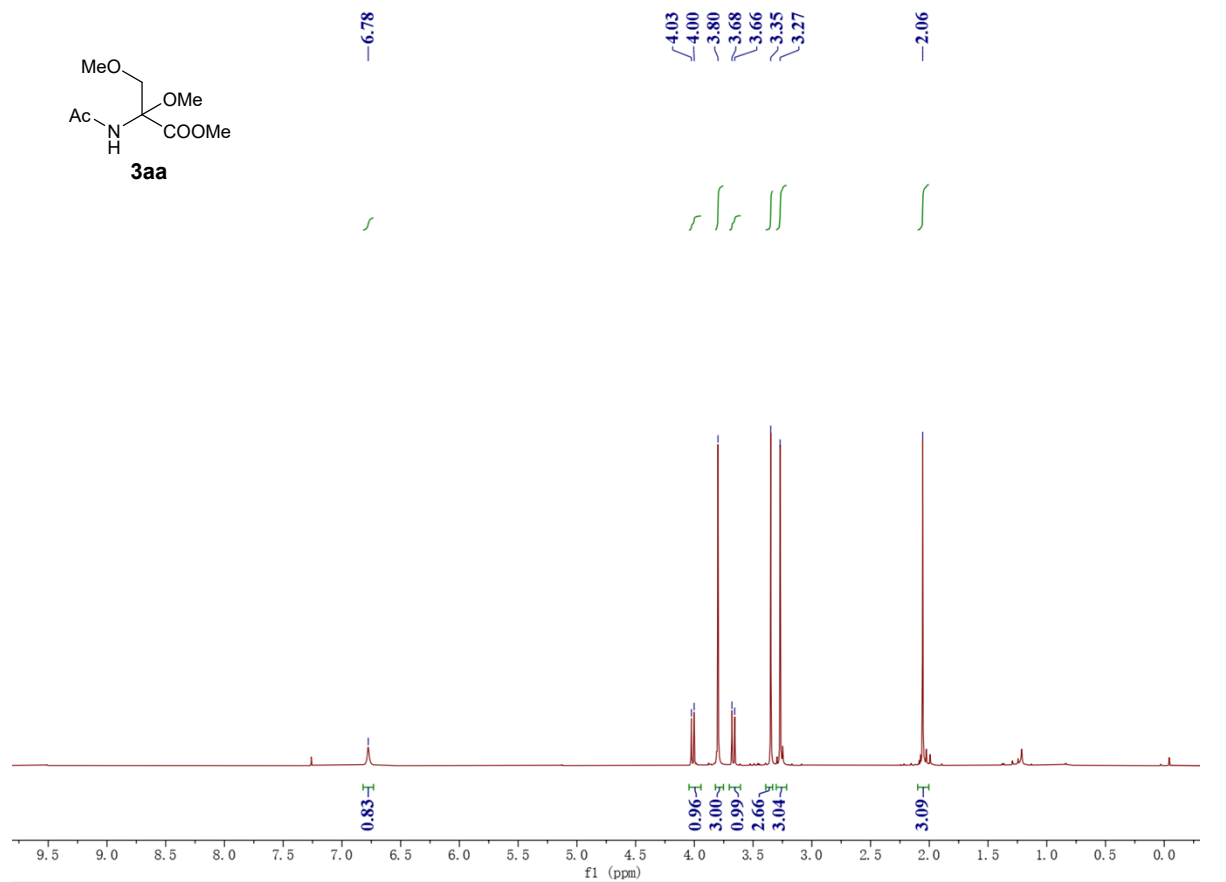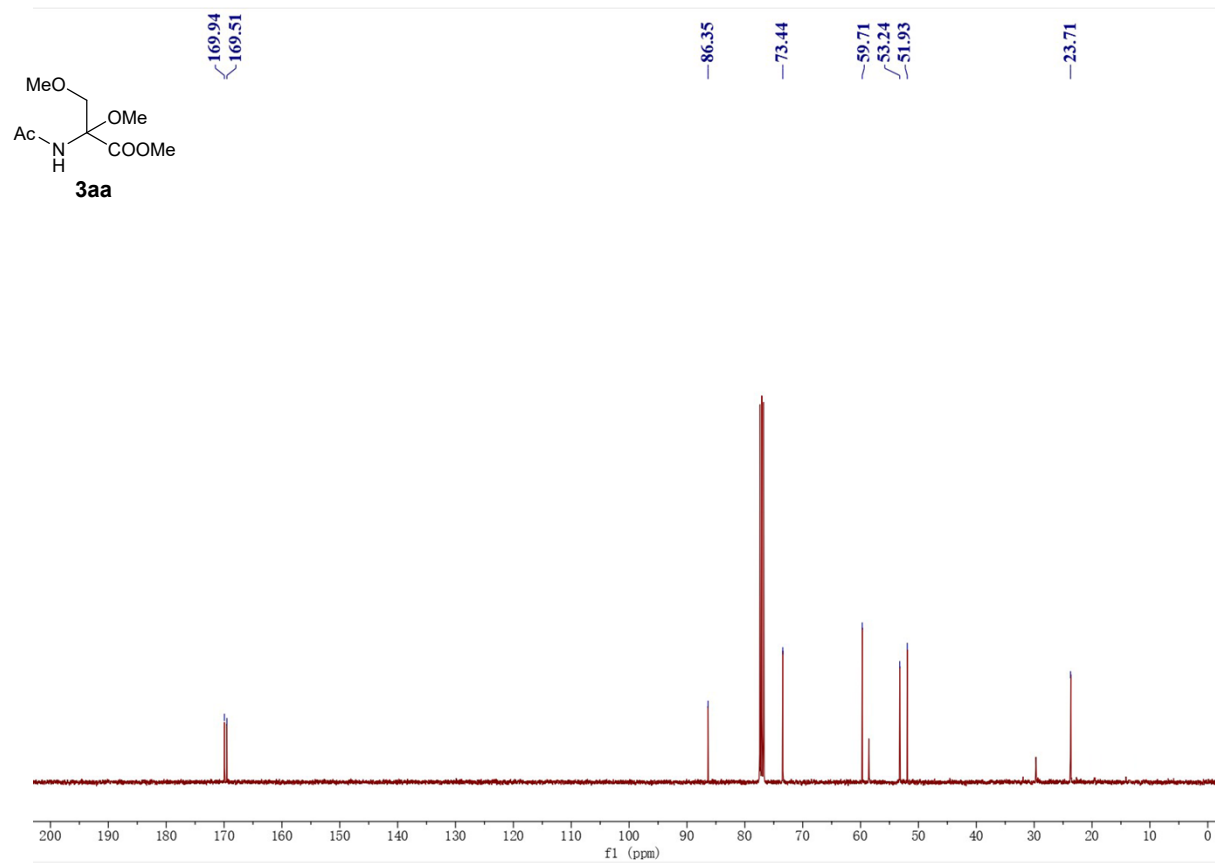

$^1\text{H}$  and  $^{13}\text{C}$  NMR spectra of **3ab**

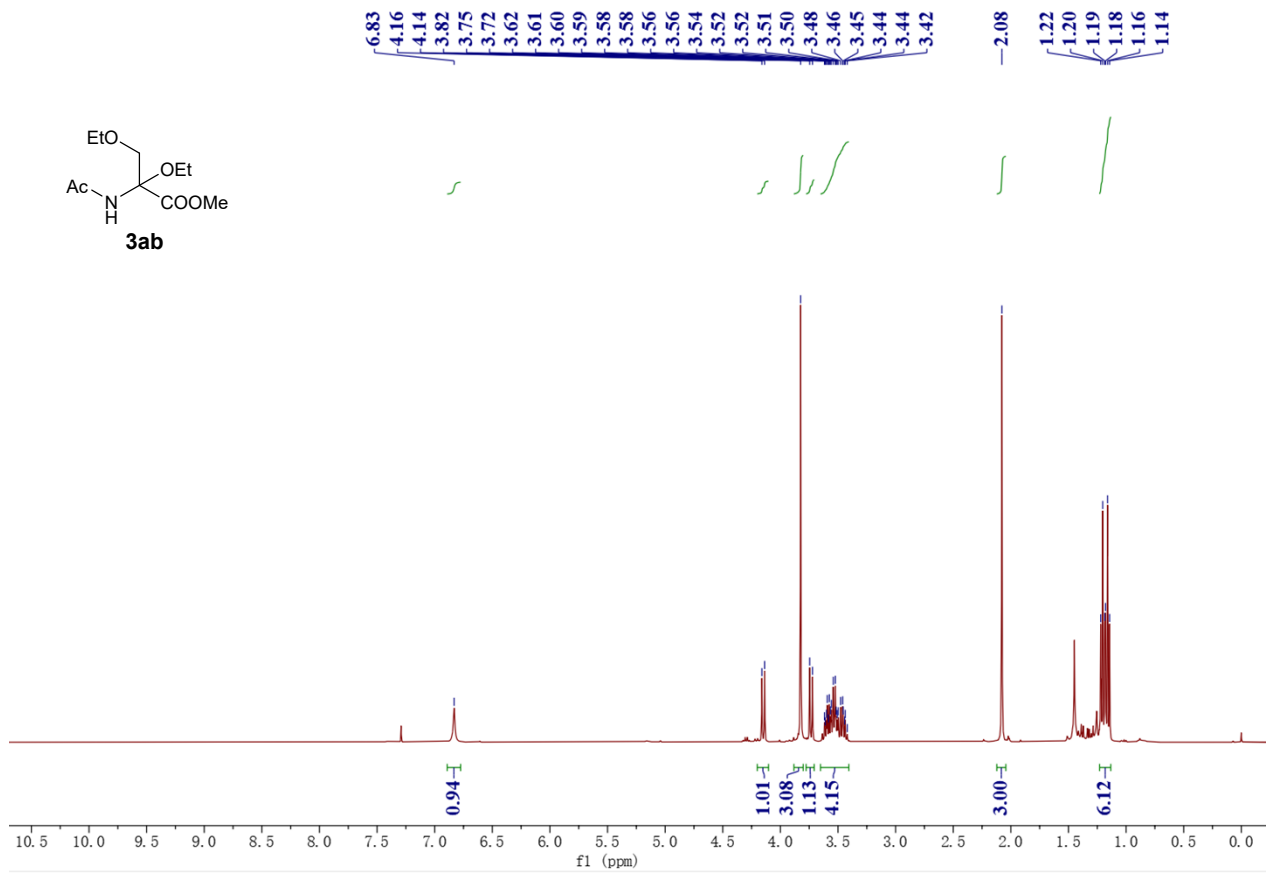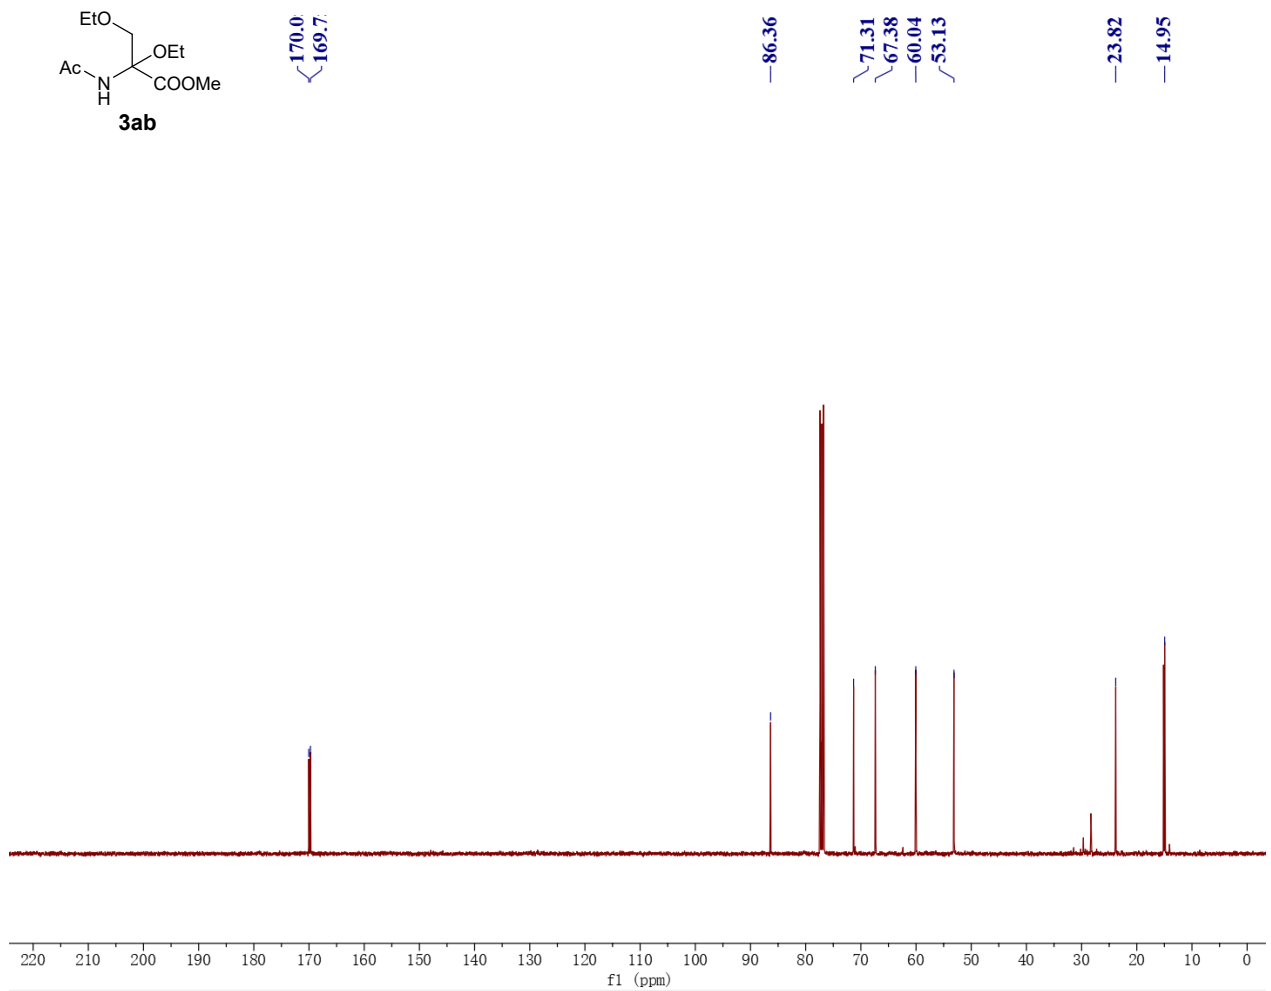

<sup>1</sup>H and <sup>13</sup>C NMR spectra of **3ac**

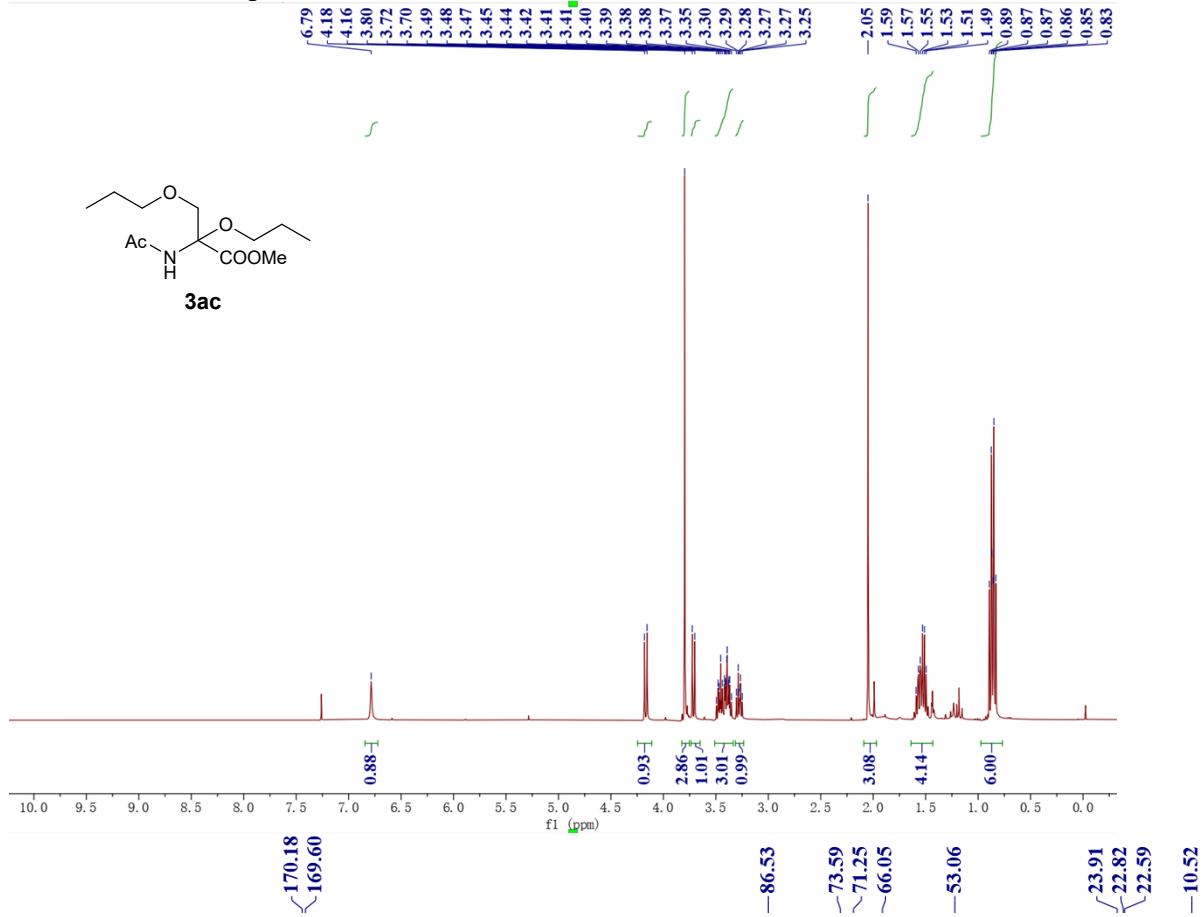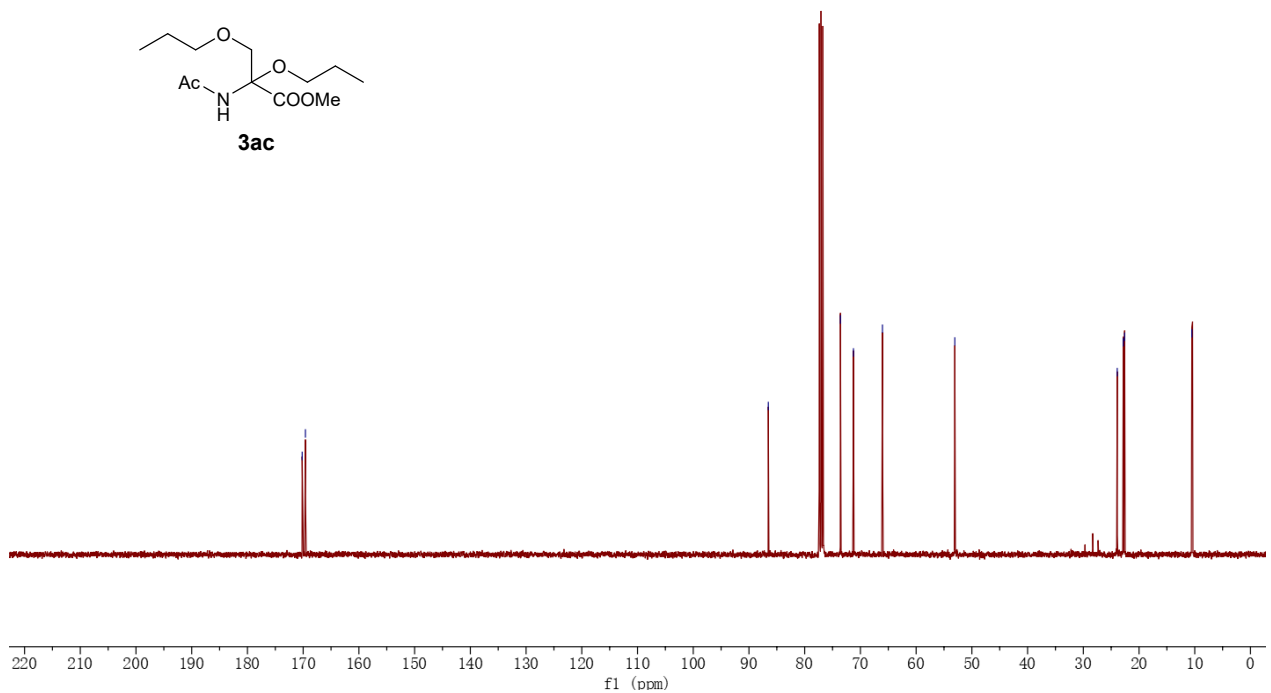

# $^1\text{H}$ and $^{13}\text{C}$ NMR spectra of **3ad**

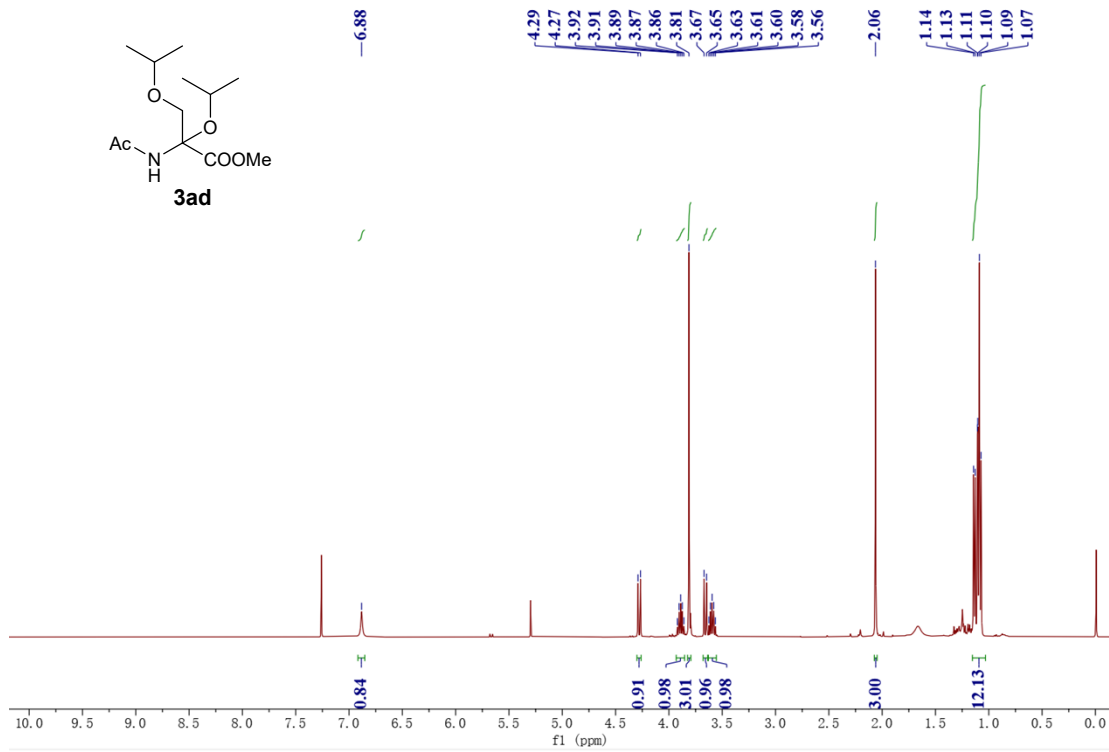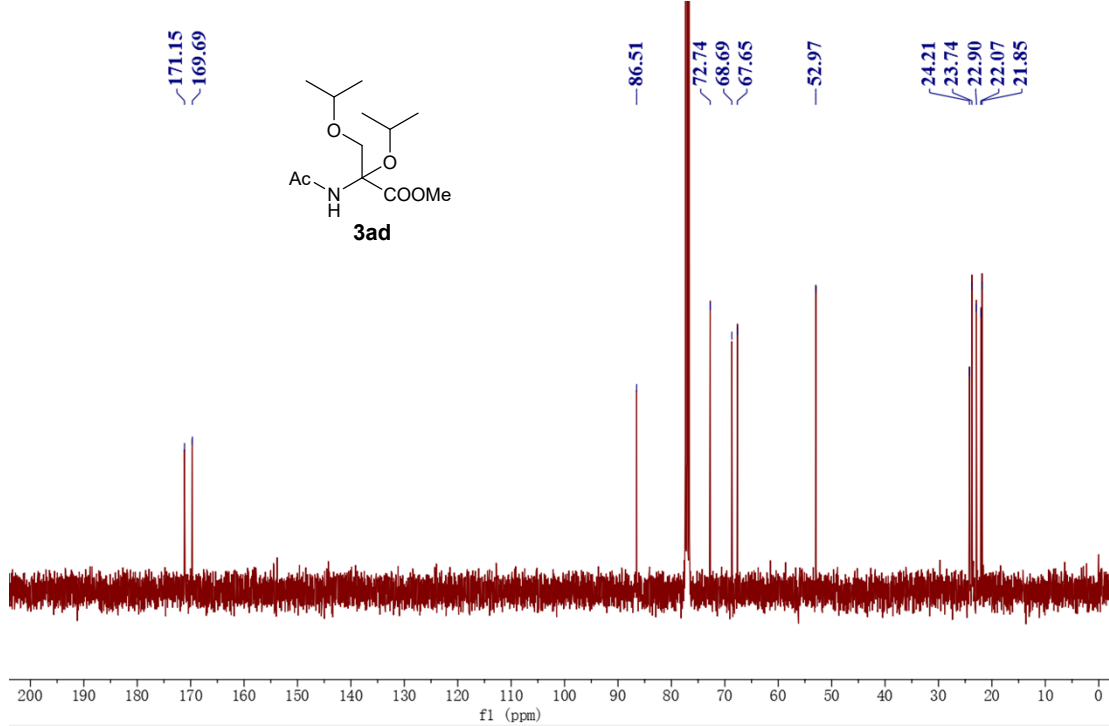

# <sup>1</sup>H and <sup>13</sup>C NMR spectra of **3ae**

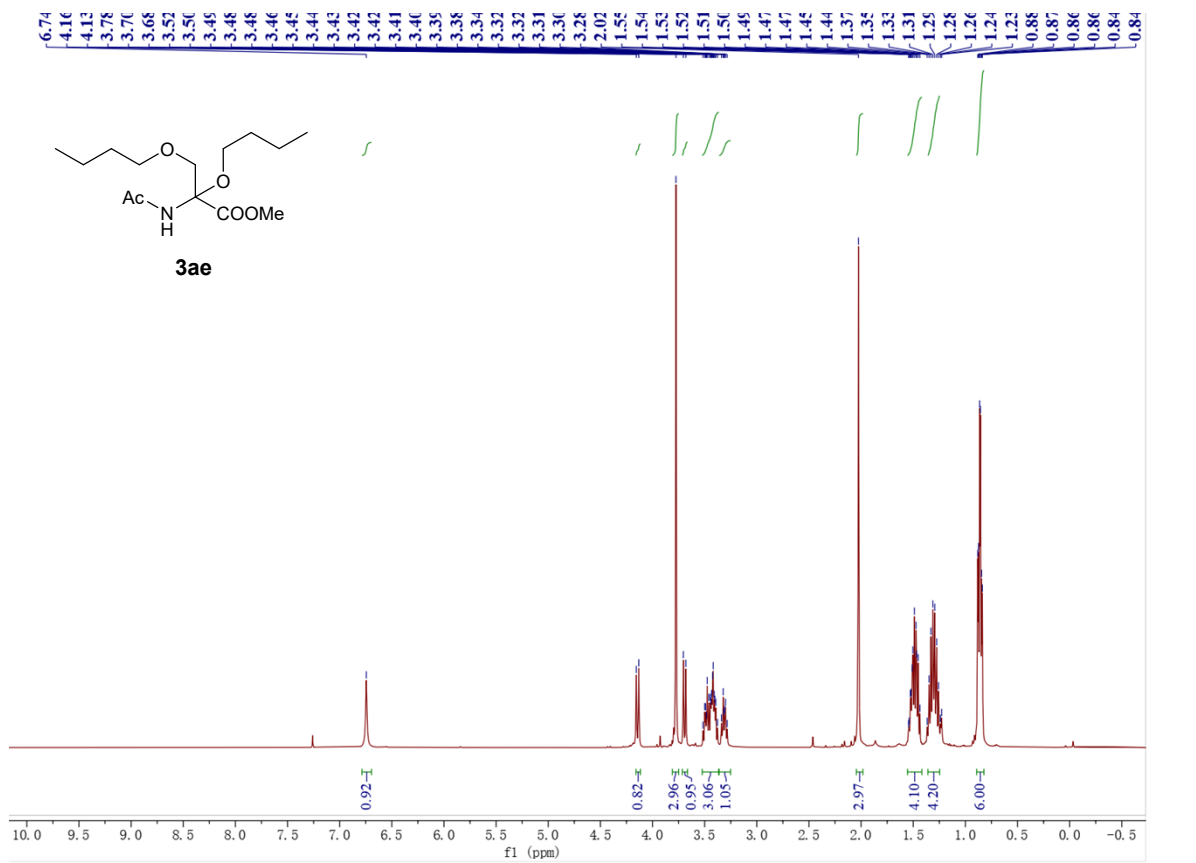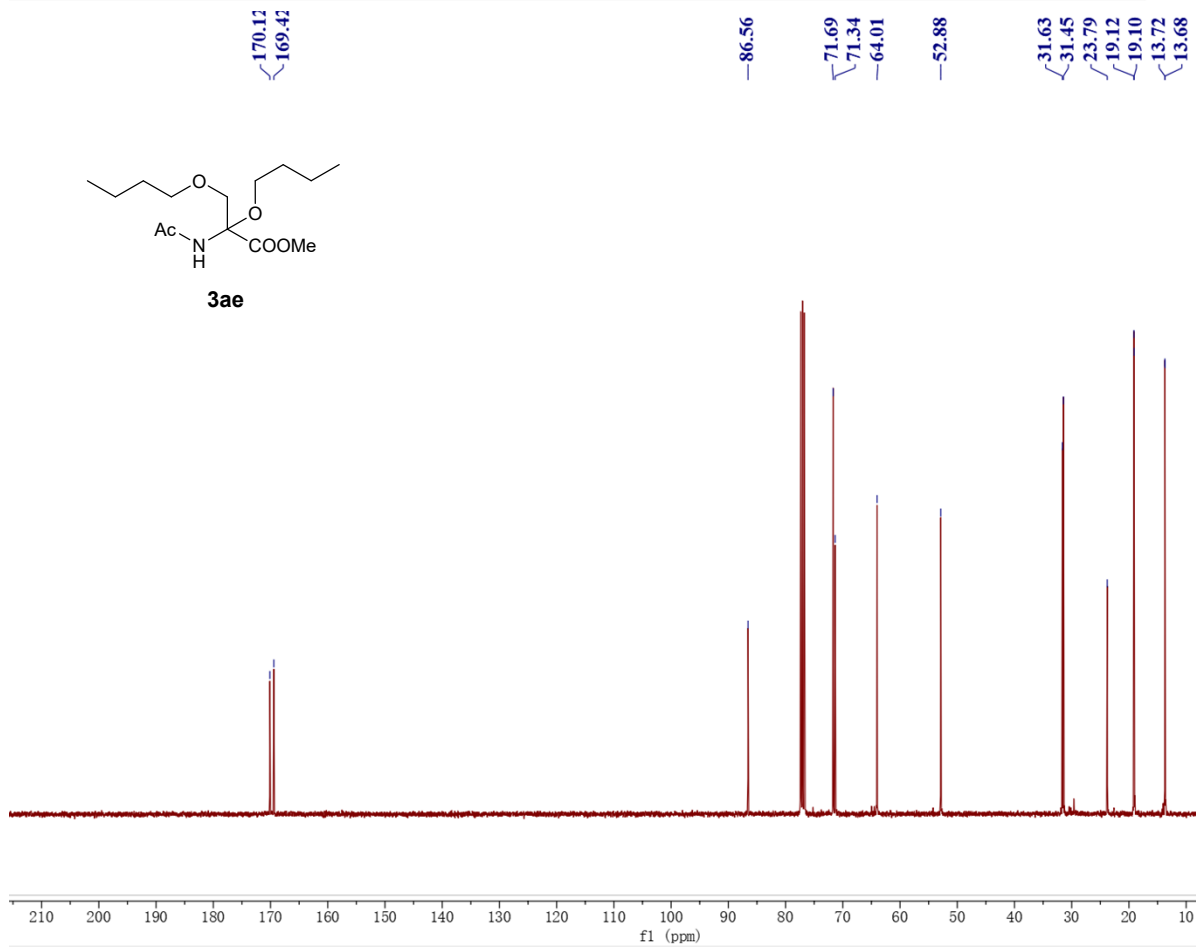

<sup>1</sup>H and <sup>13</sup>C NMR spectra of **3af**

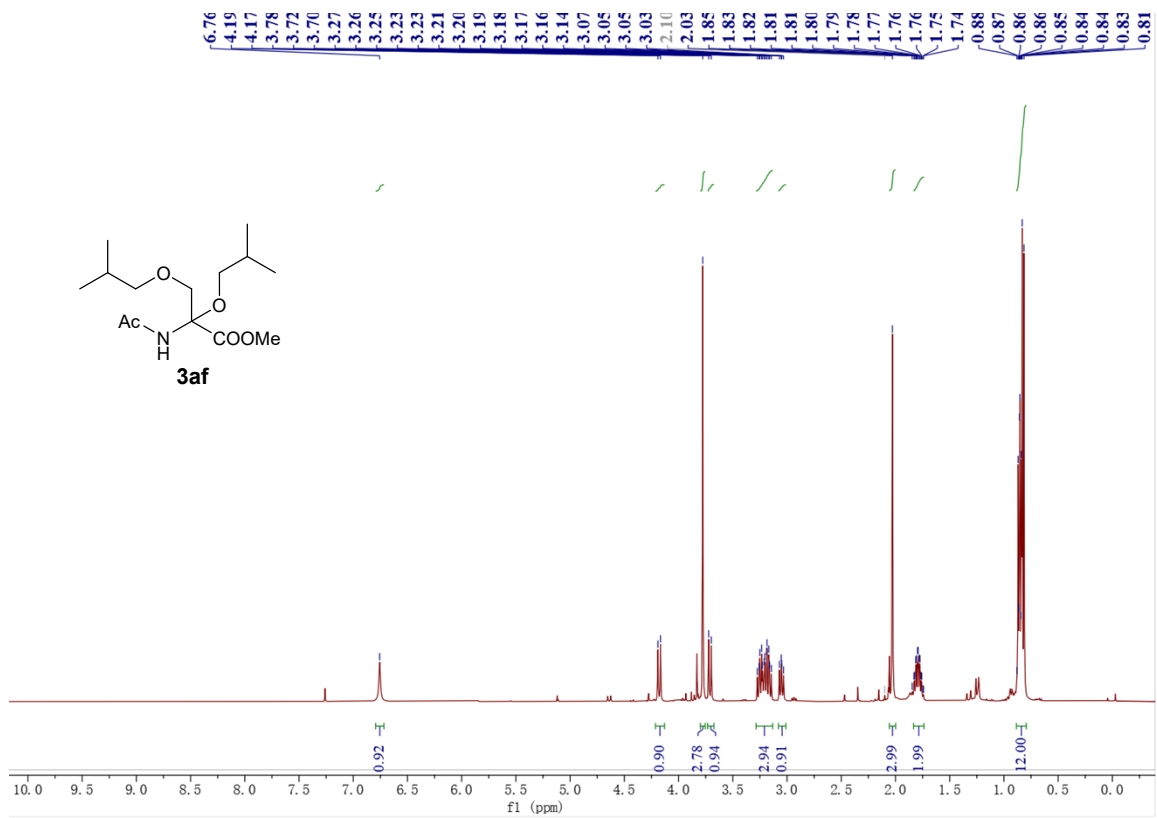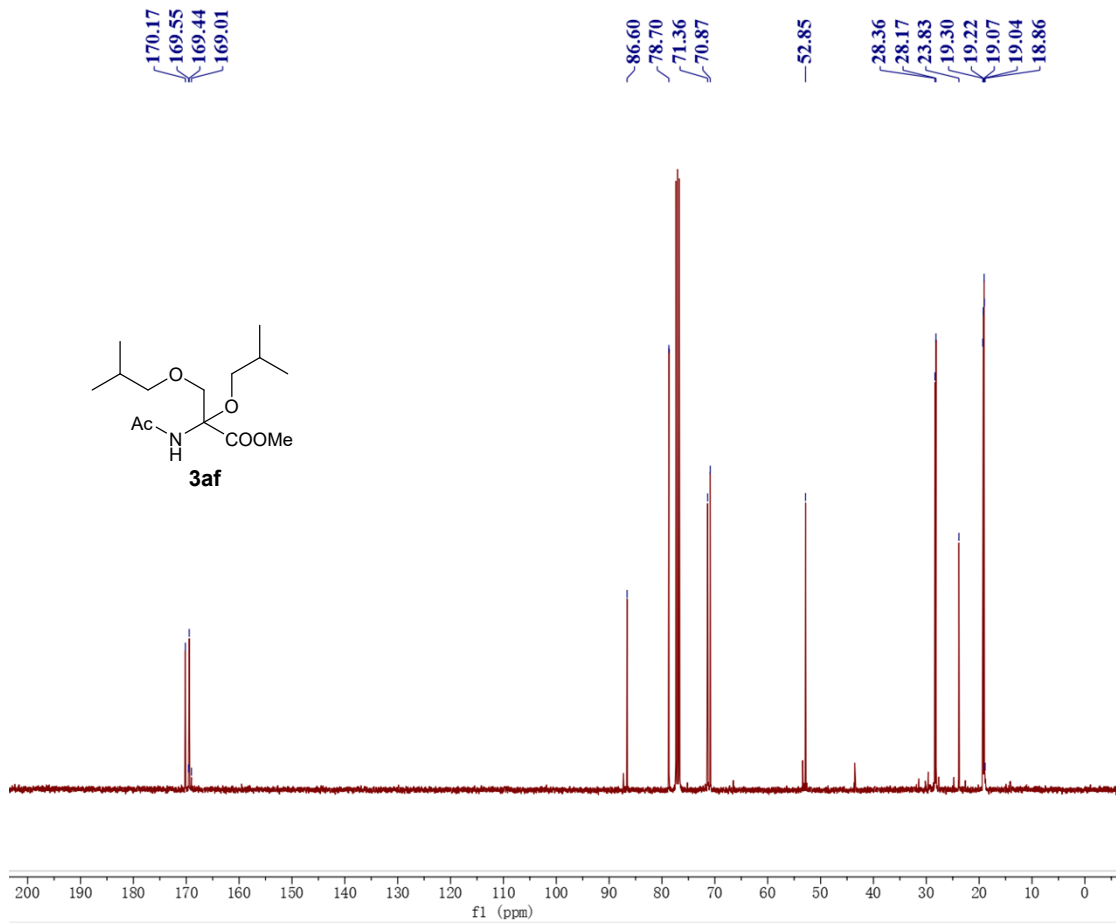

<sup>1</sup>H and <sup>13</sup>C NMR spectra of **3af**

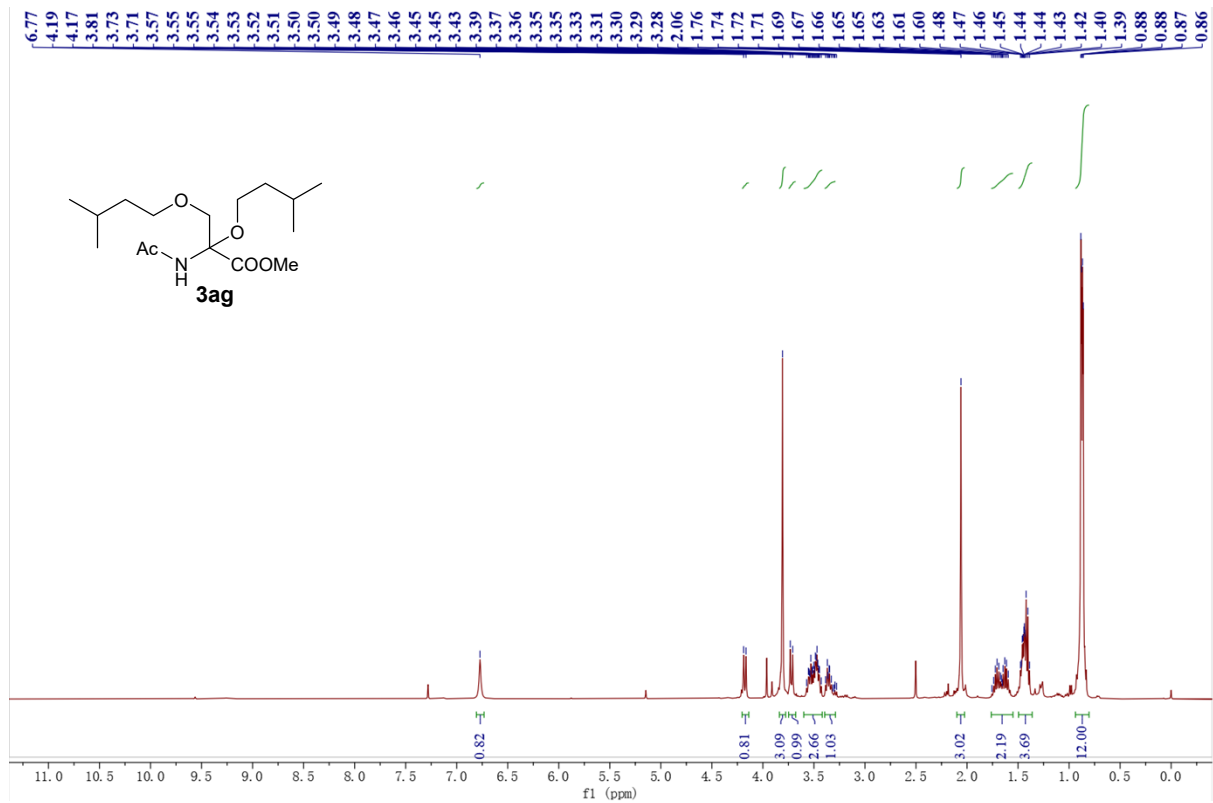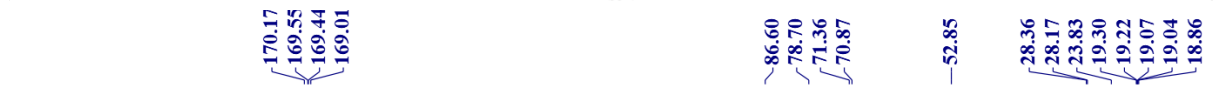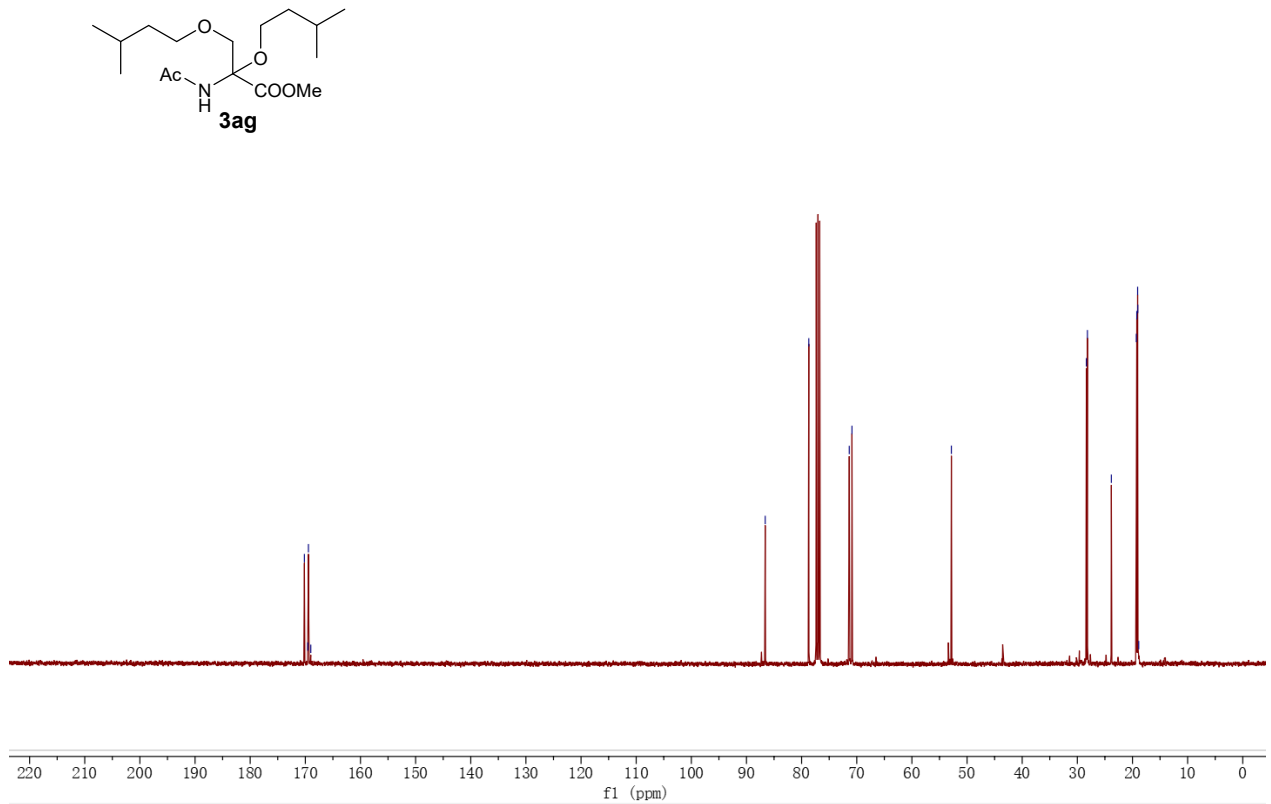

$^1\text{H}$  and  $^{13}\text{C}$  NMR spectra of **3ba**

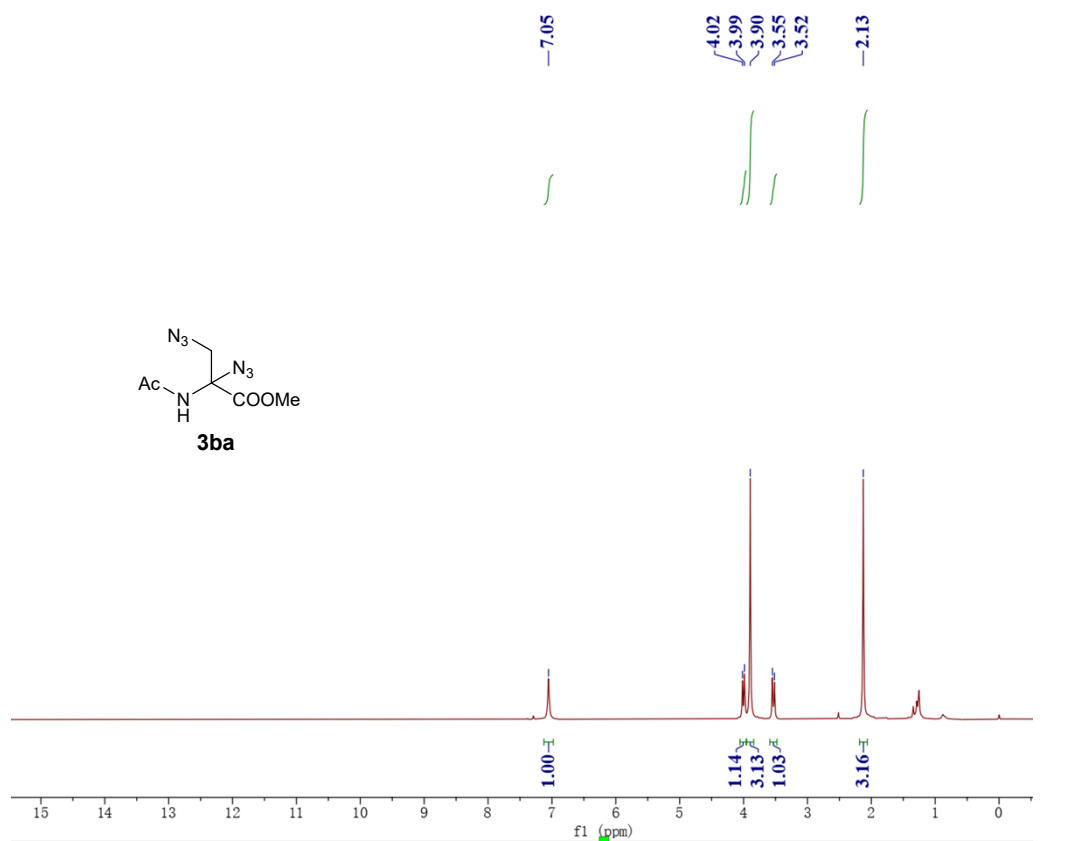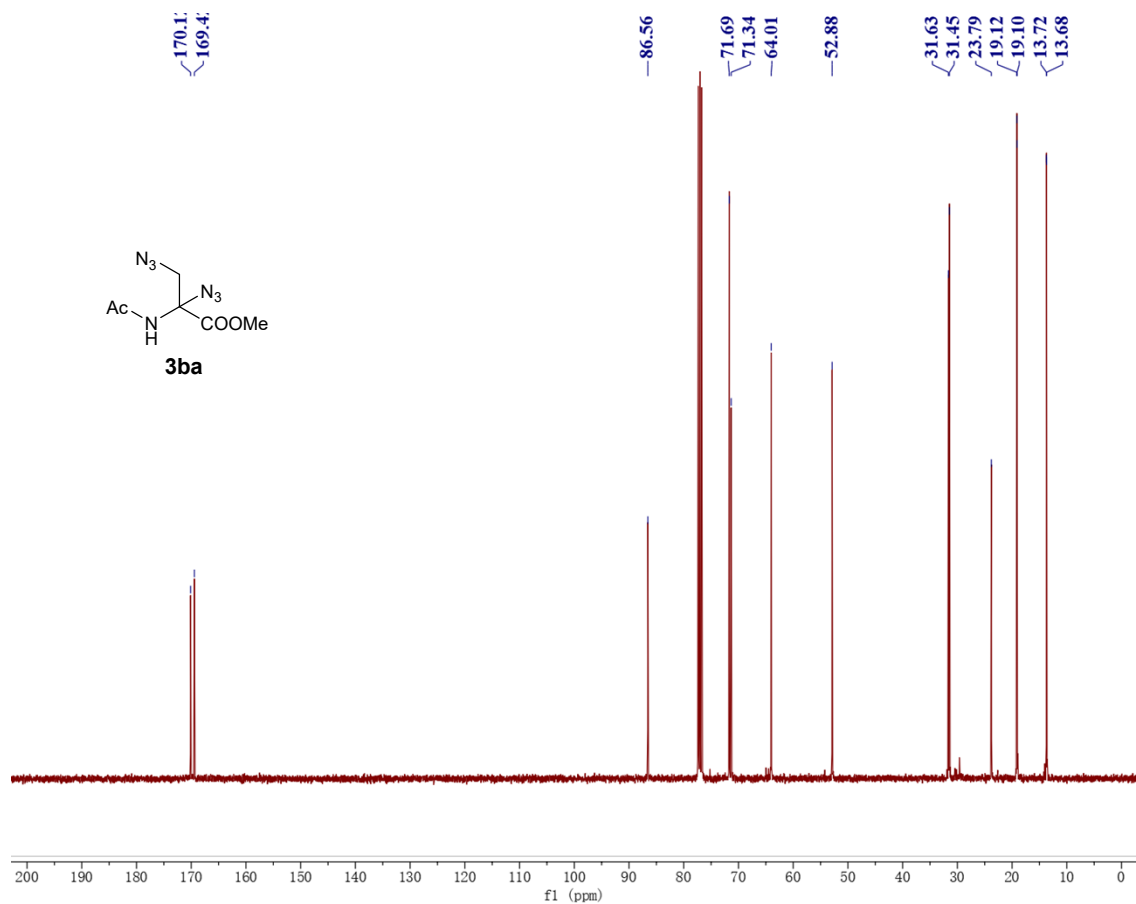



# $^1\text{H}$ and $^{13}\text{C}$ NMR spectra of **3ah**

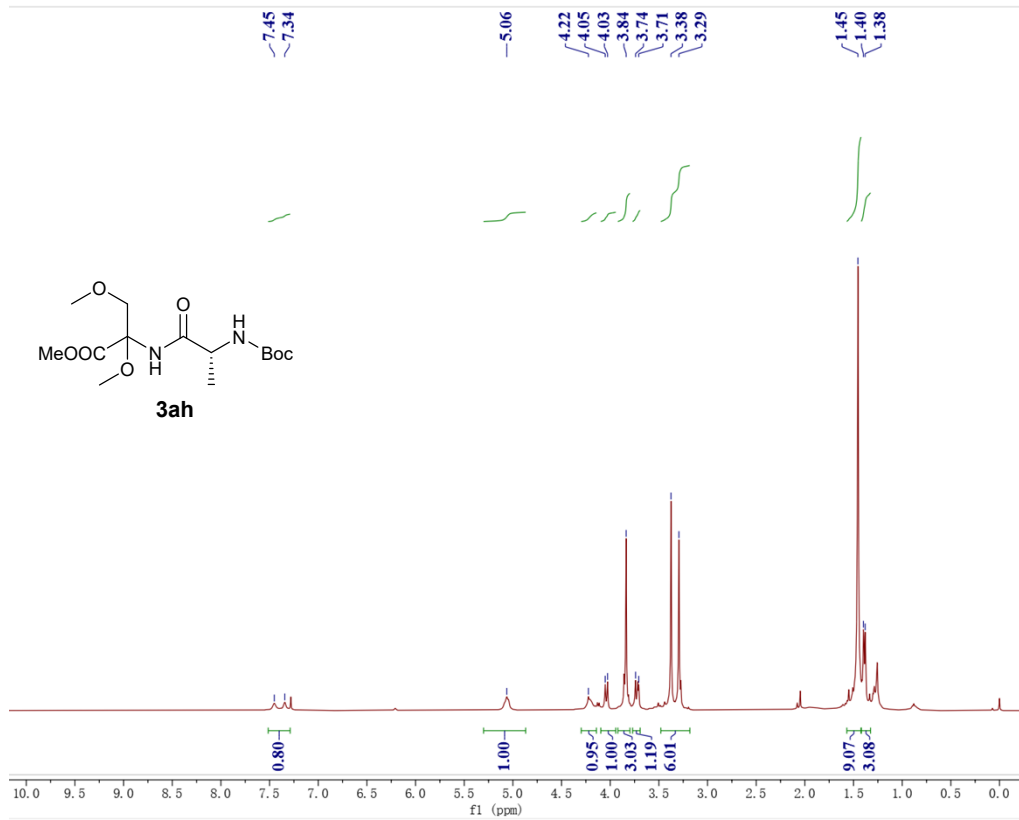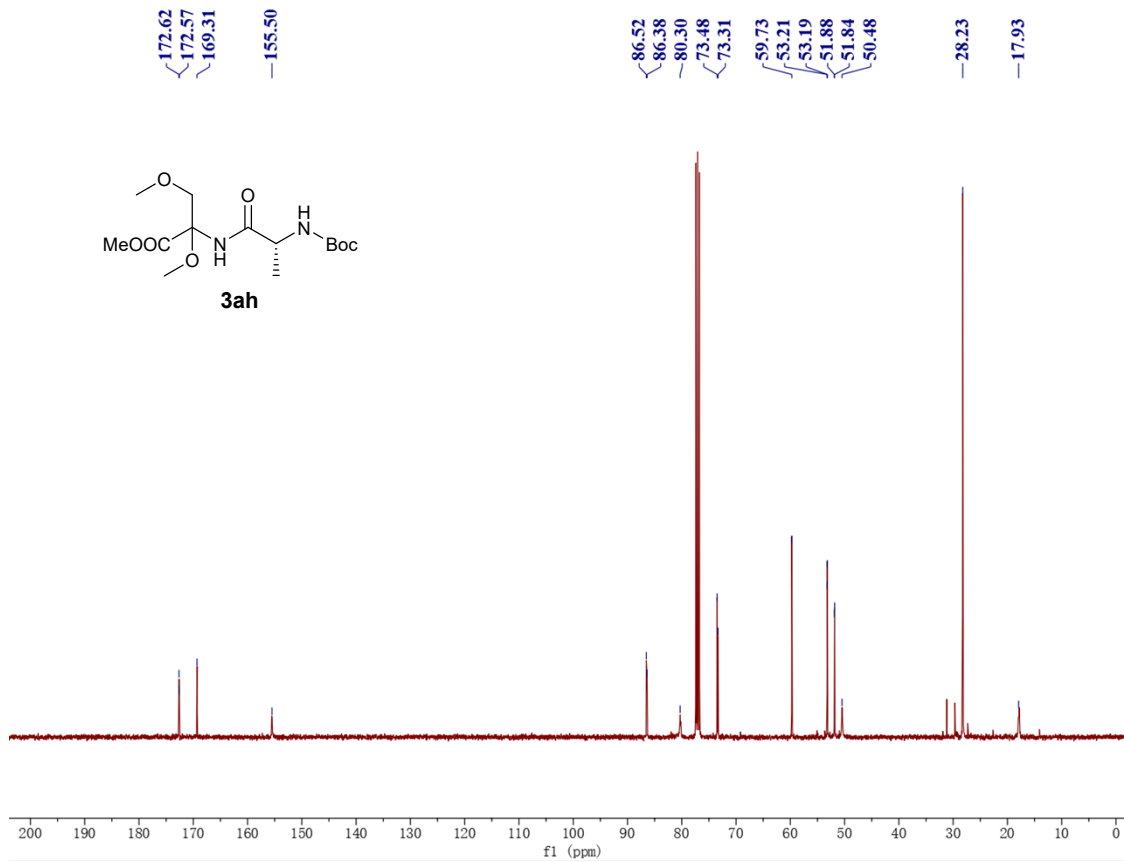

# $^1\text{H}$ and $^{13}\text{C}$ NMR spectra of **3al**

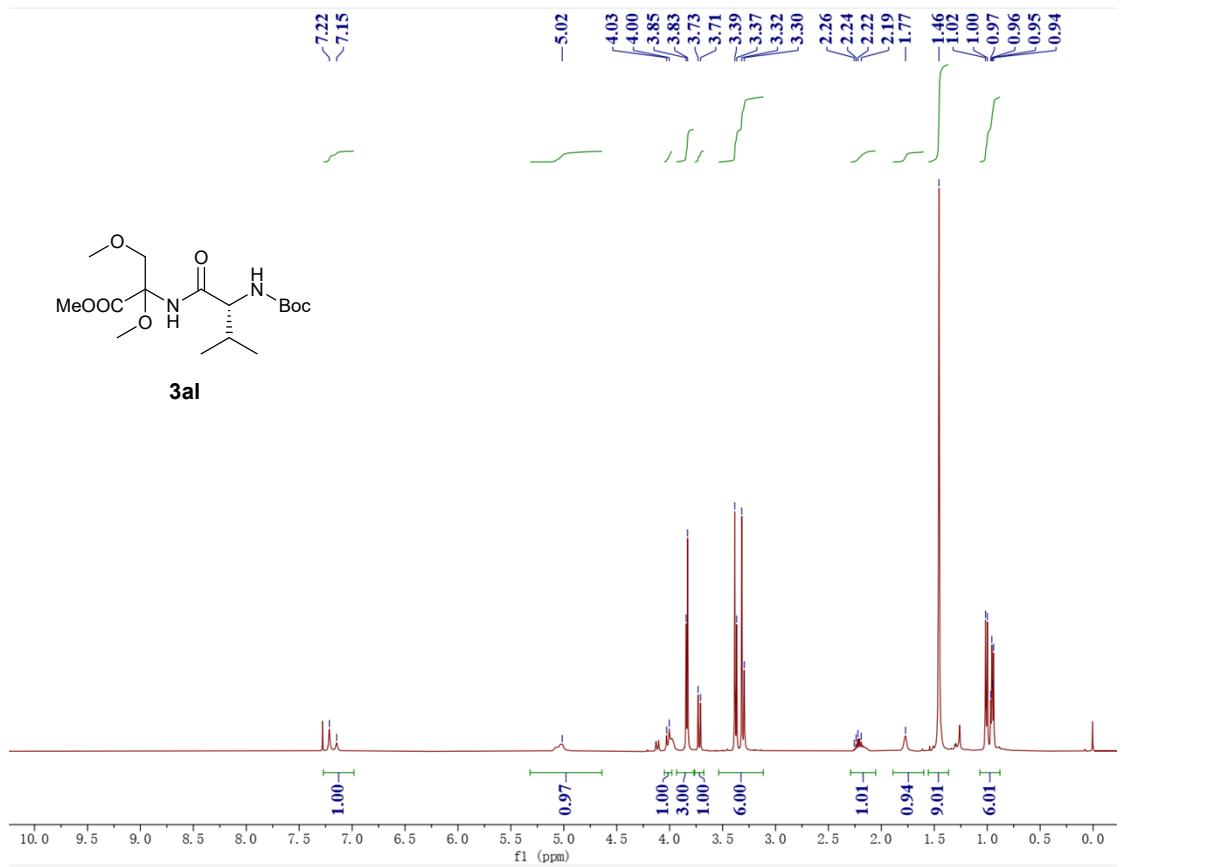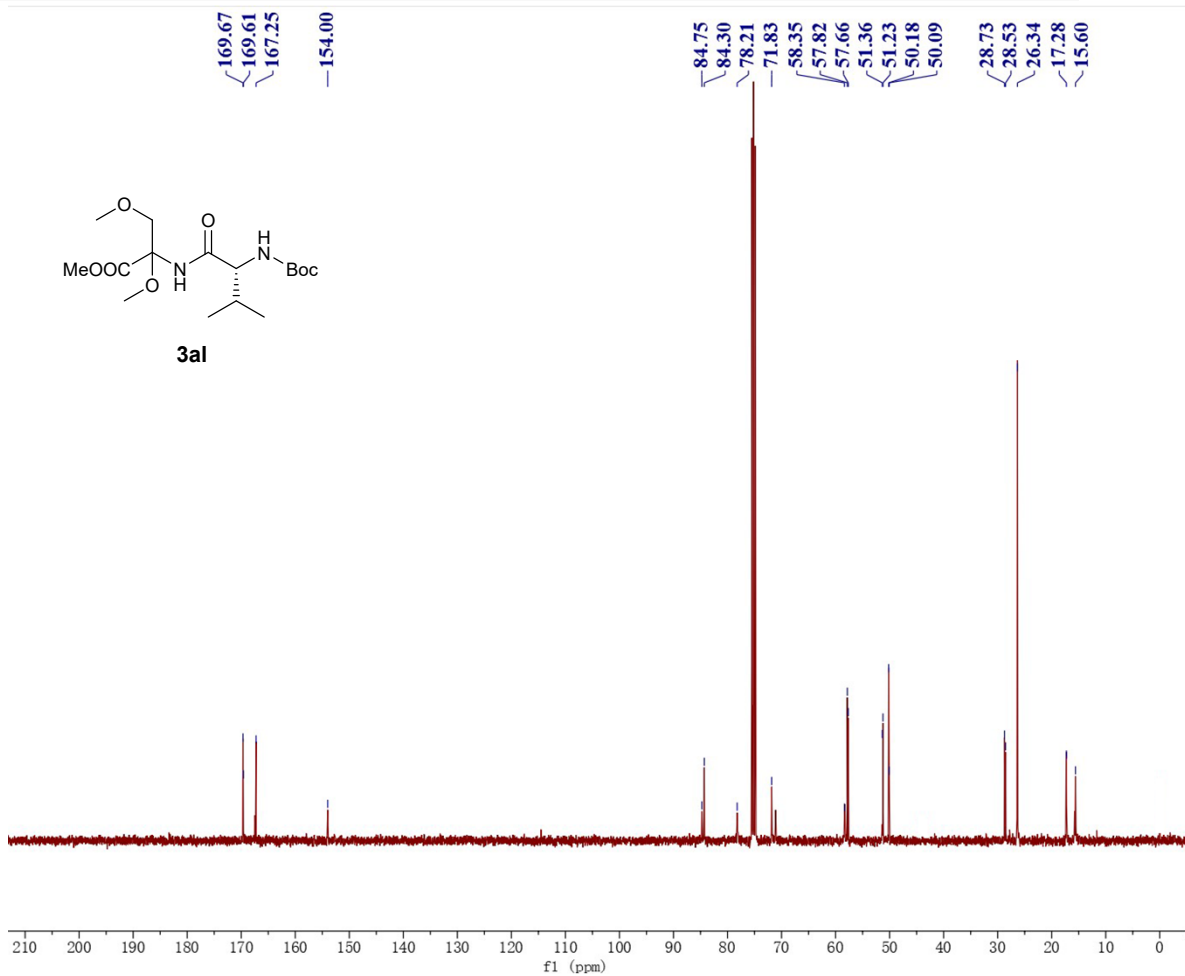

# $^1\text{H}$ and $^{13}\text{C}$ NMR spectra of **3aj**

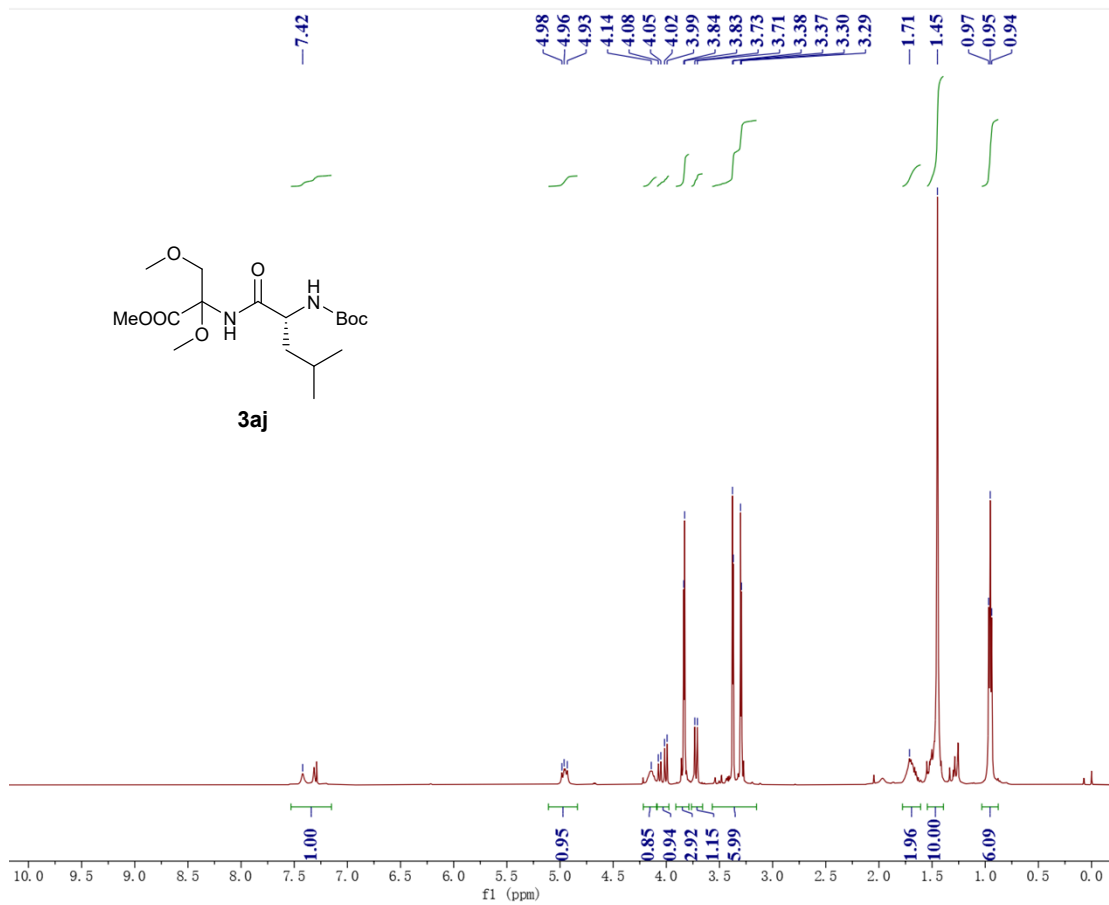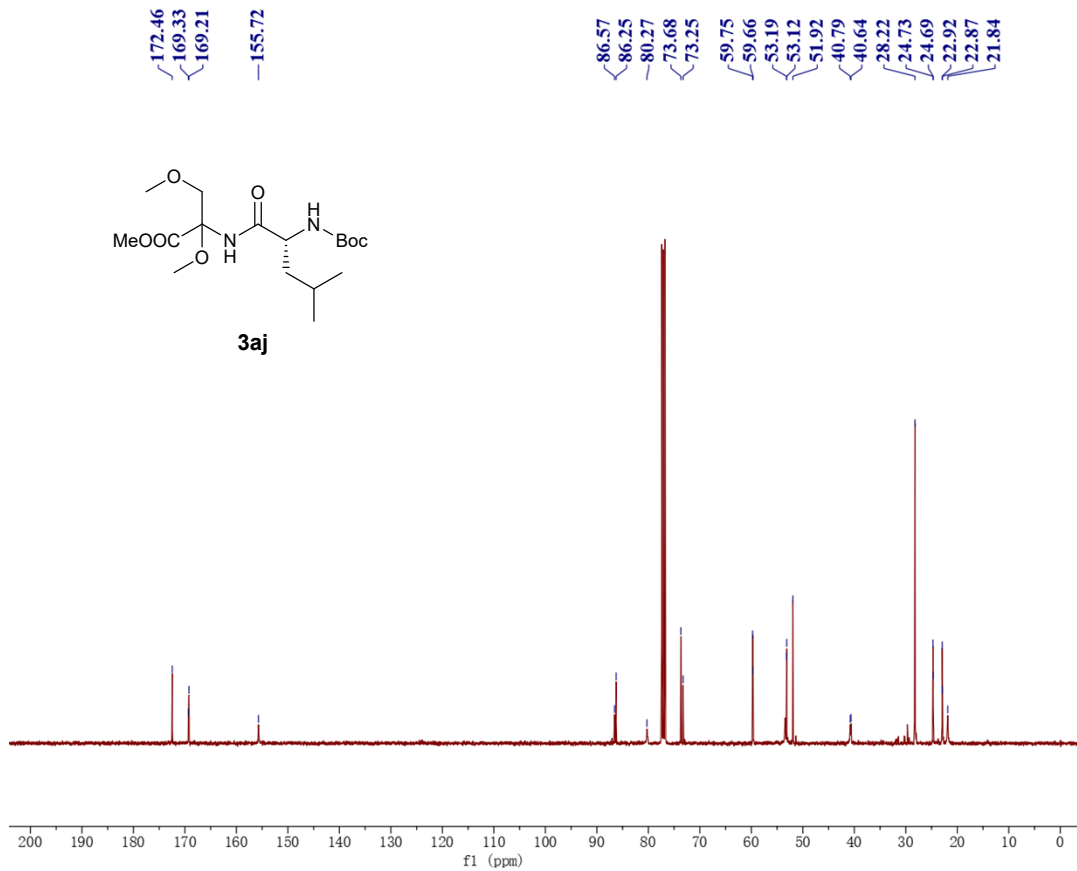

# <sup>1</sup>H and <sup>13</sup>C NMR spectra of **3ak**

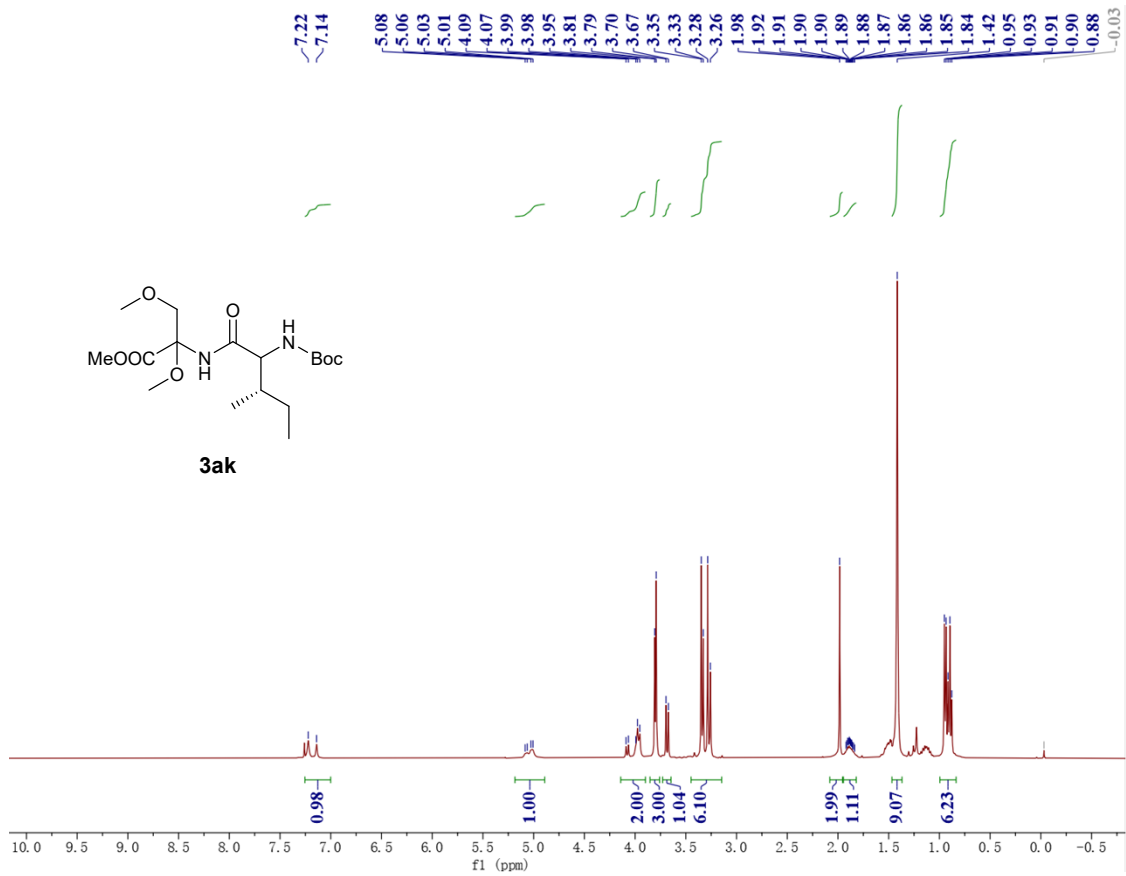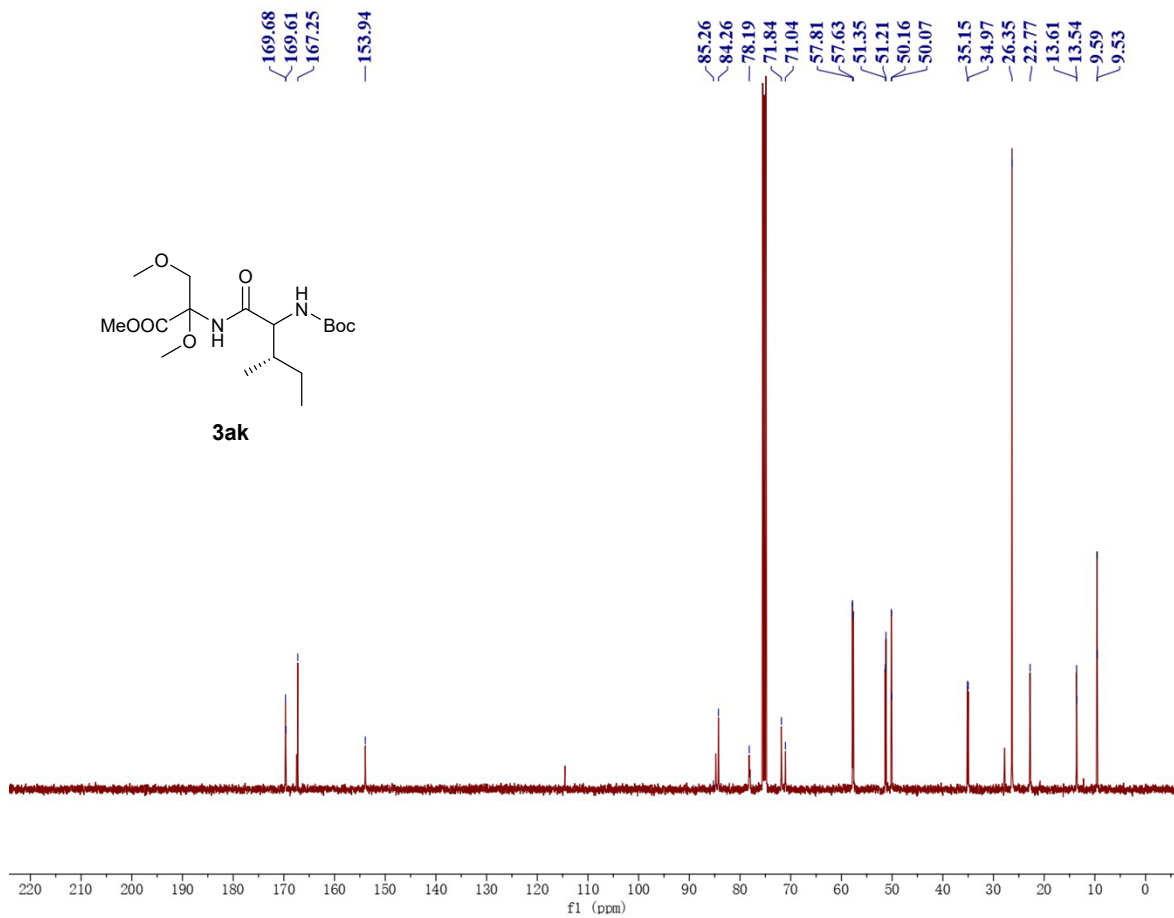

# $^1\text{H}$ and $^{13}\text{C}$ NMR spectra of **3al**

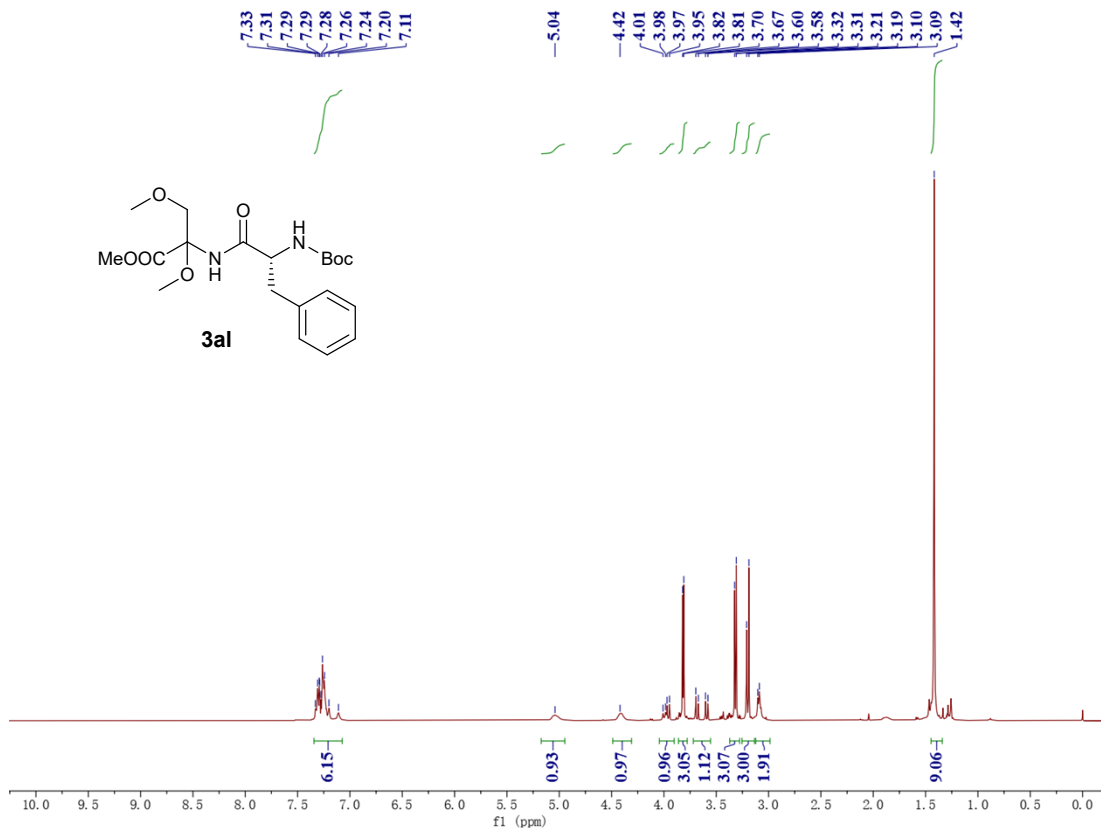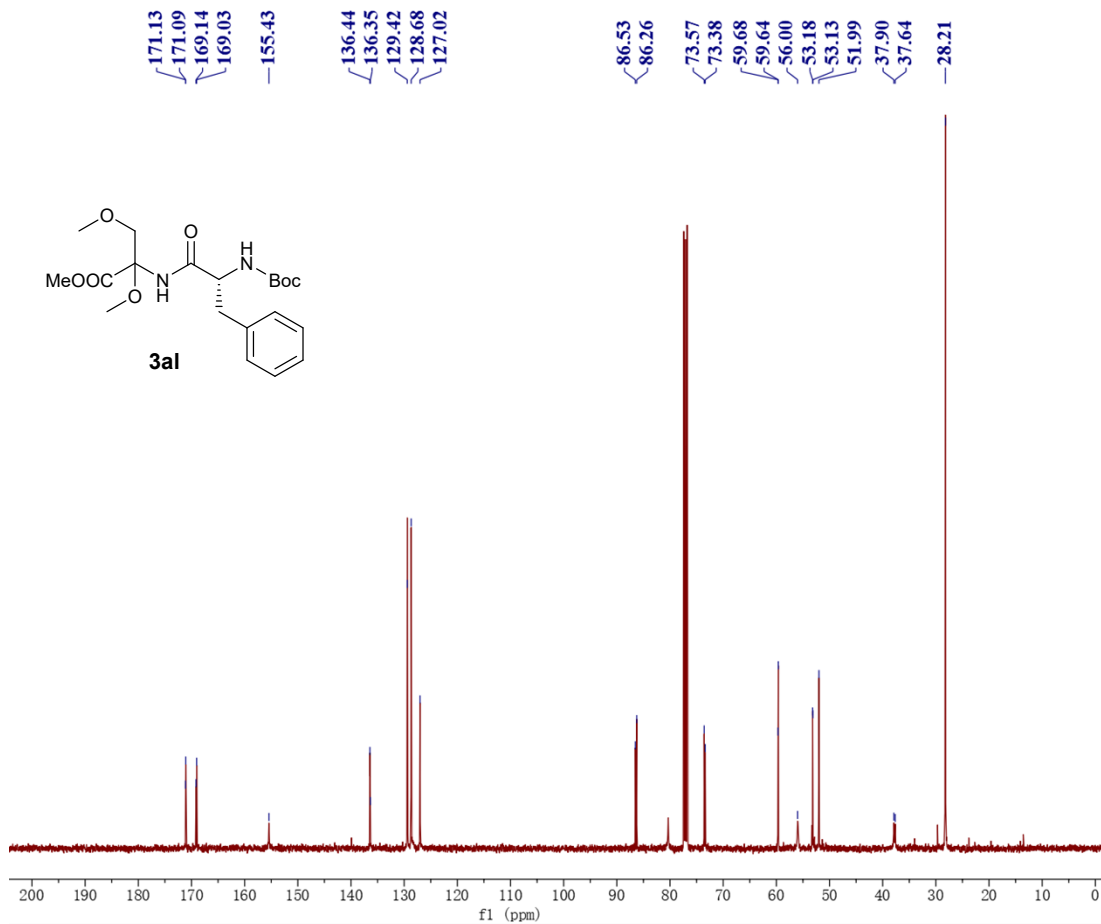

# $^1\text{H}$ and $^{13}\text{C}$ NMR spectra of **3am**

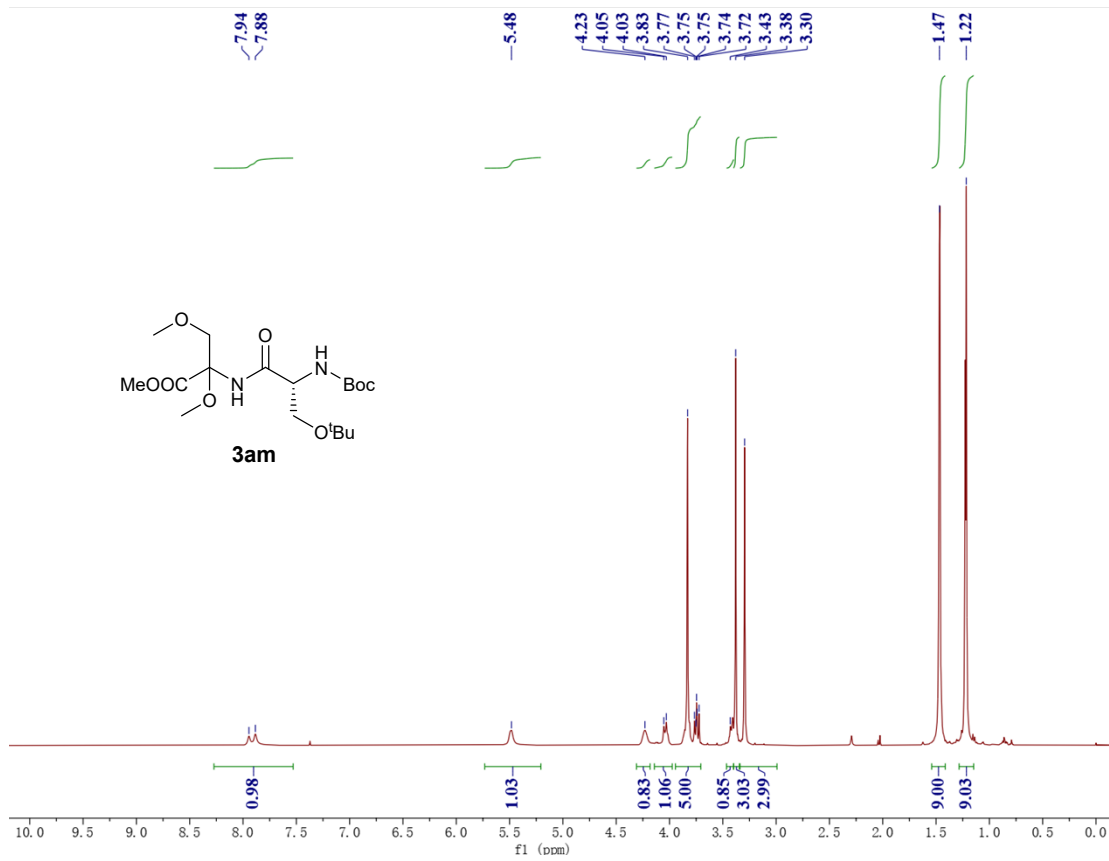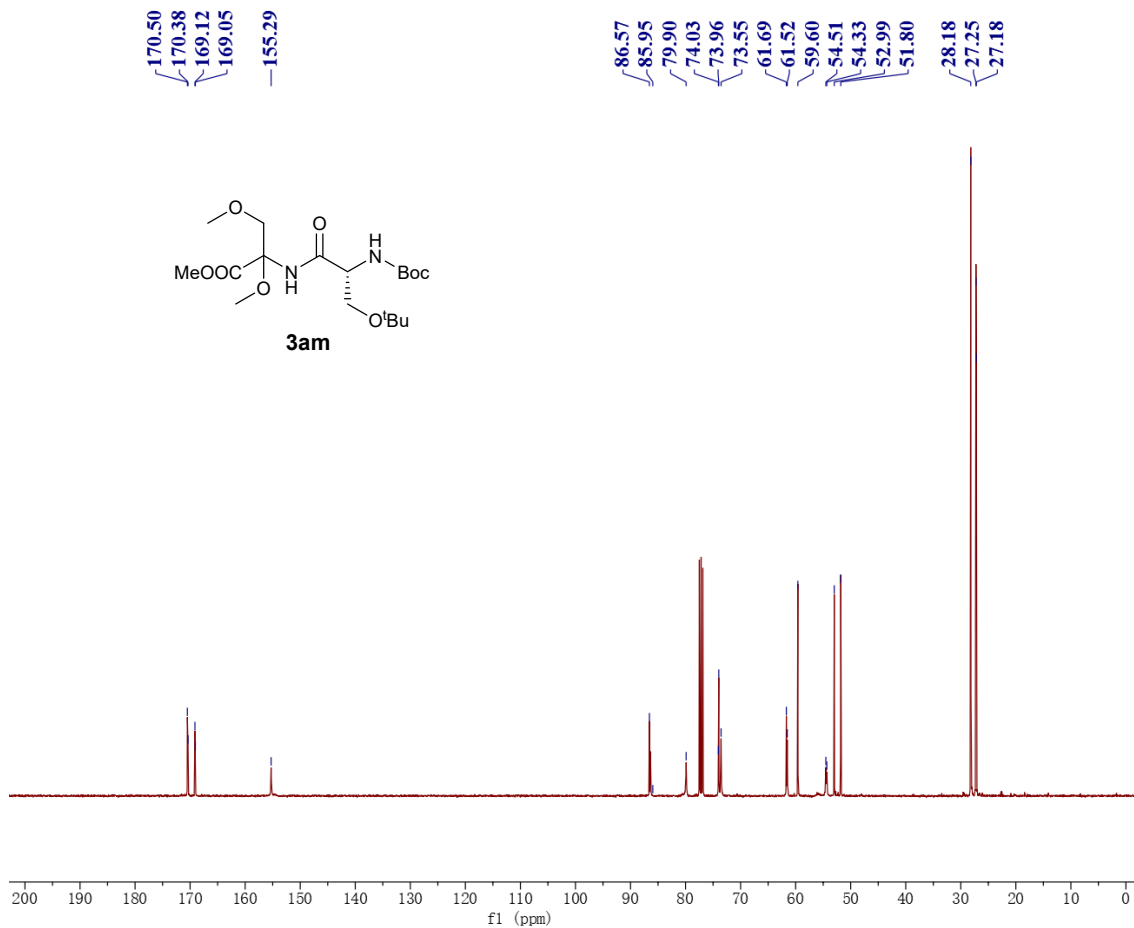

$^1\text{H}$  and  $^{13}\text{C}$  NMR spectra of **3bb**

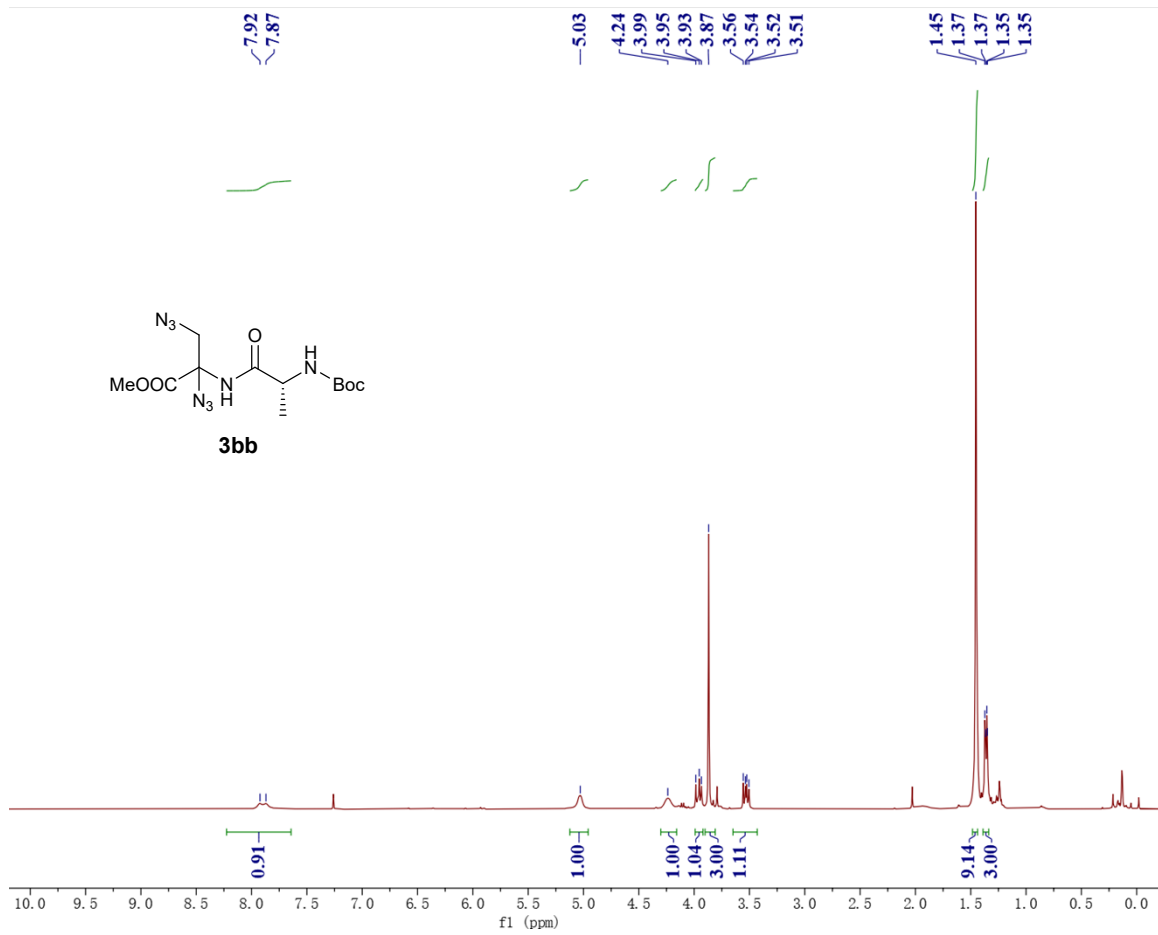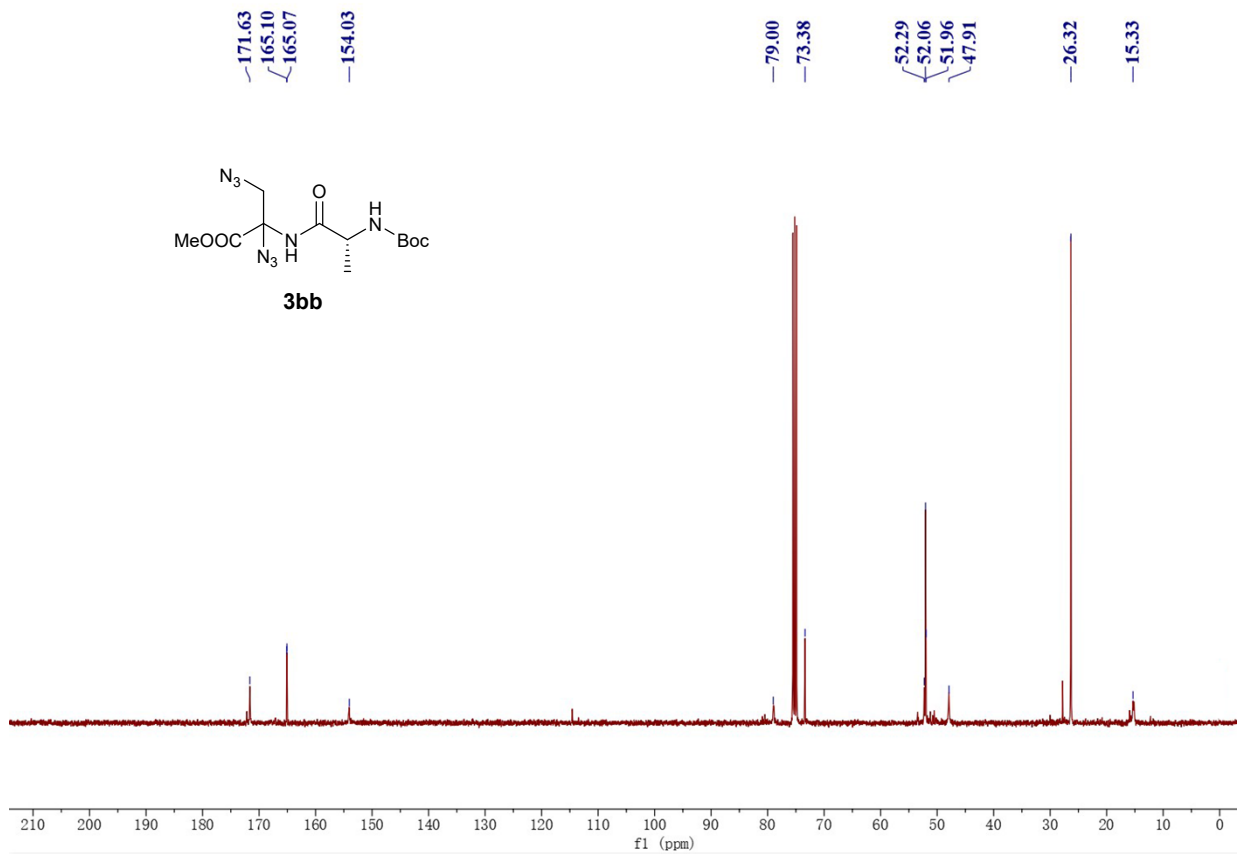

$^1\text{H}$  and  $^{13}\text{C}$  NMR spectra of **3bc**

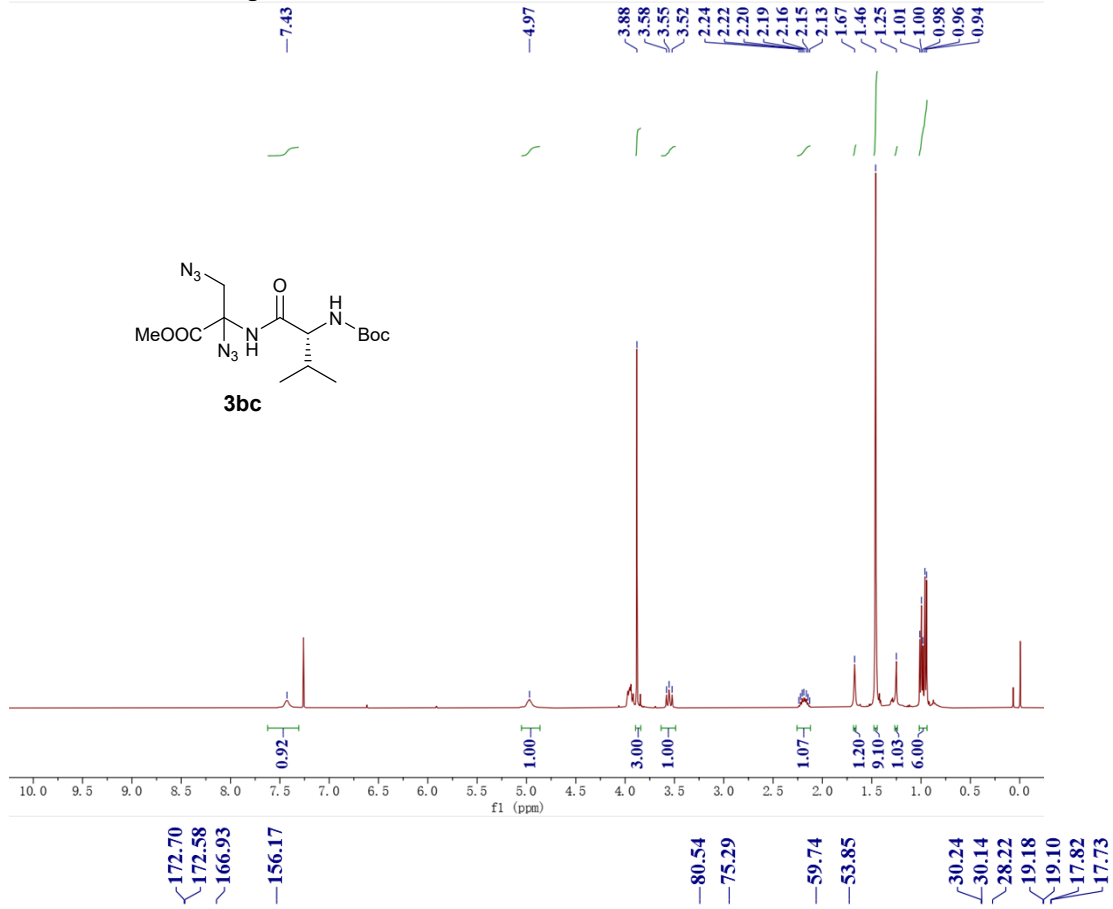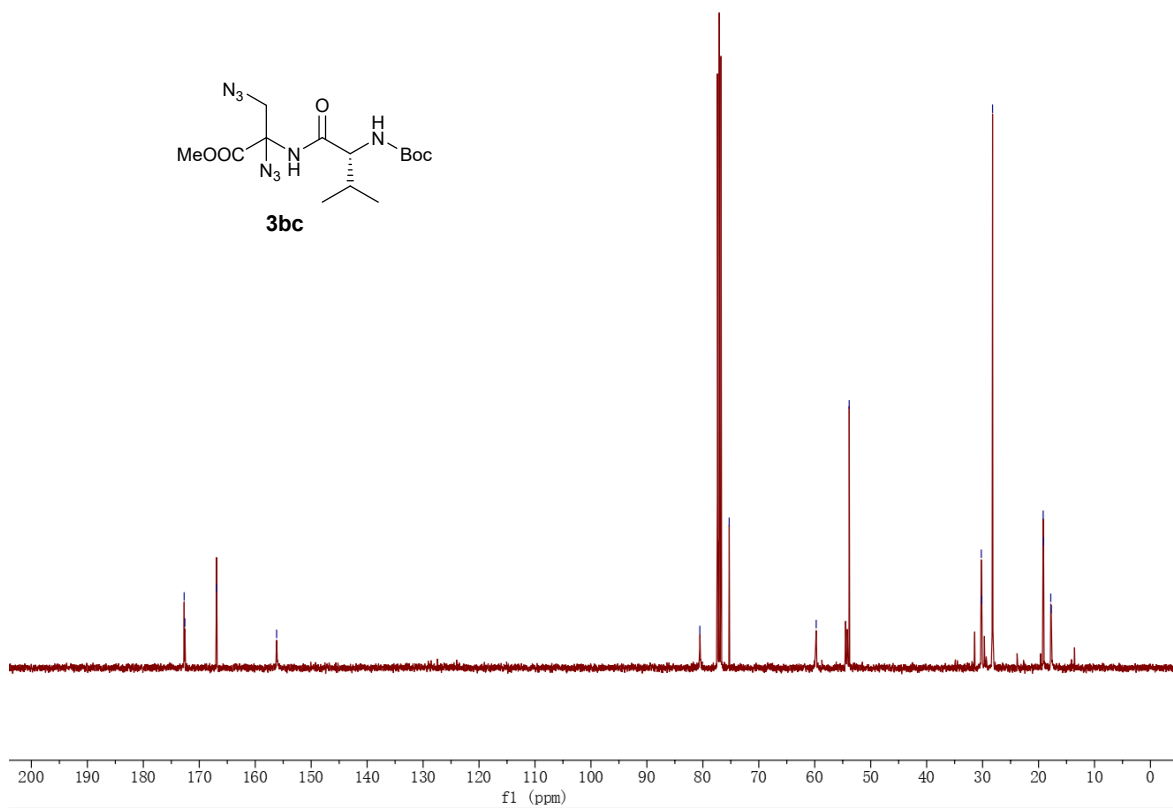



$^1\text{H}$  and  $^{13}\text{C}$  NMR spectra of **3bd**

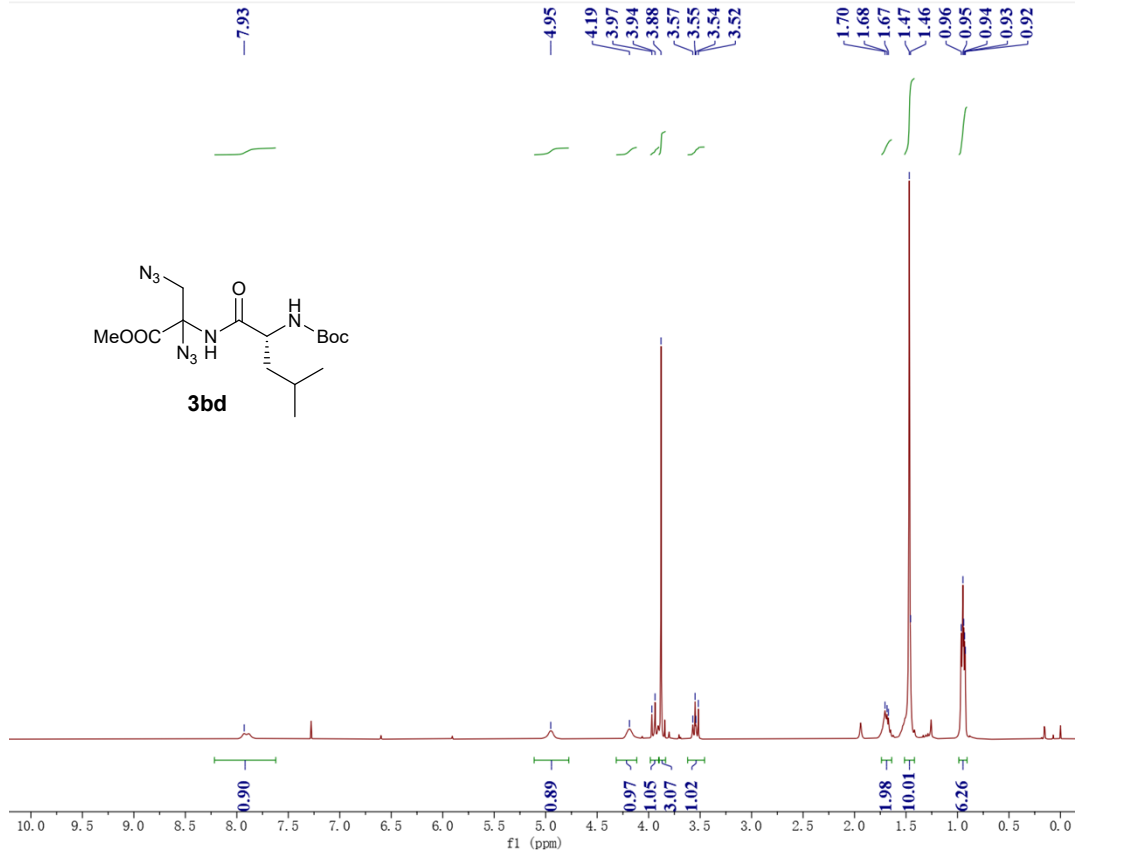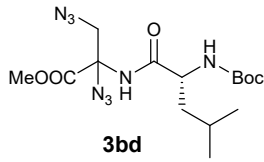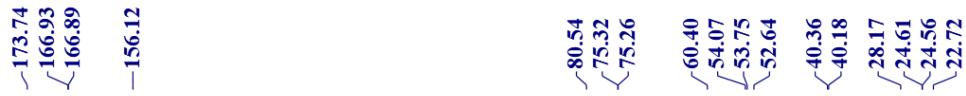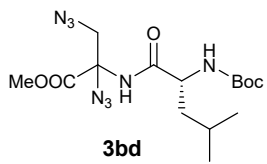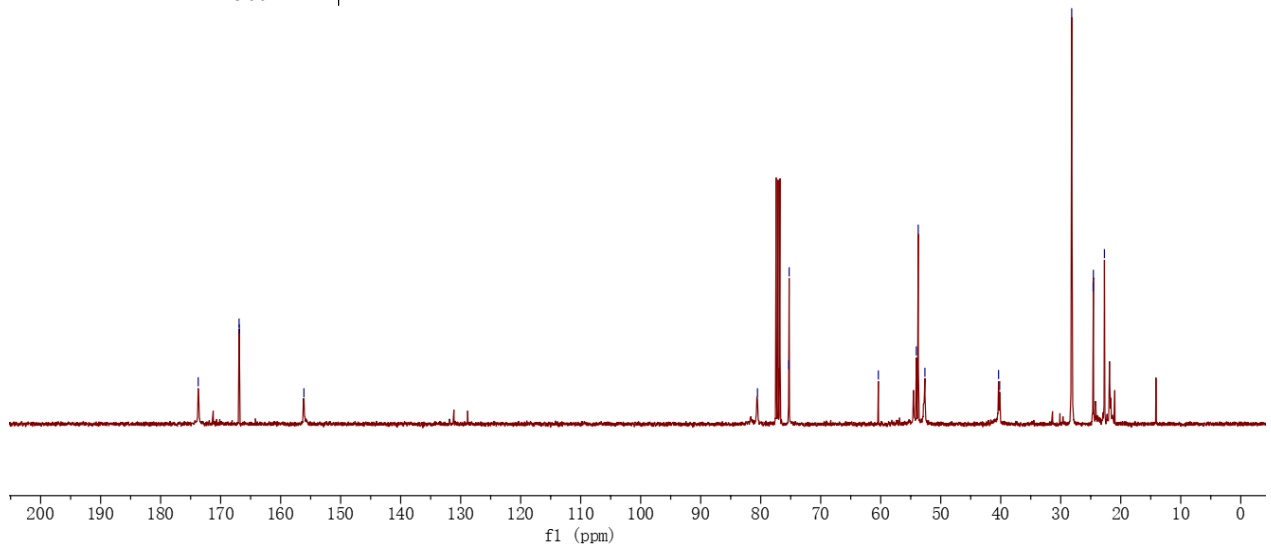

$^1\text{H}$  and  $^{13}\text{C}$  NMR spectra of **3ak**

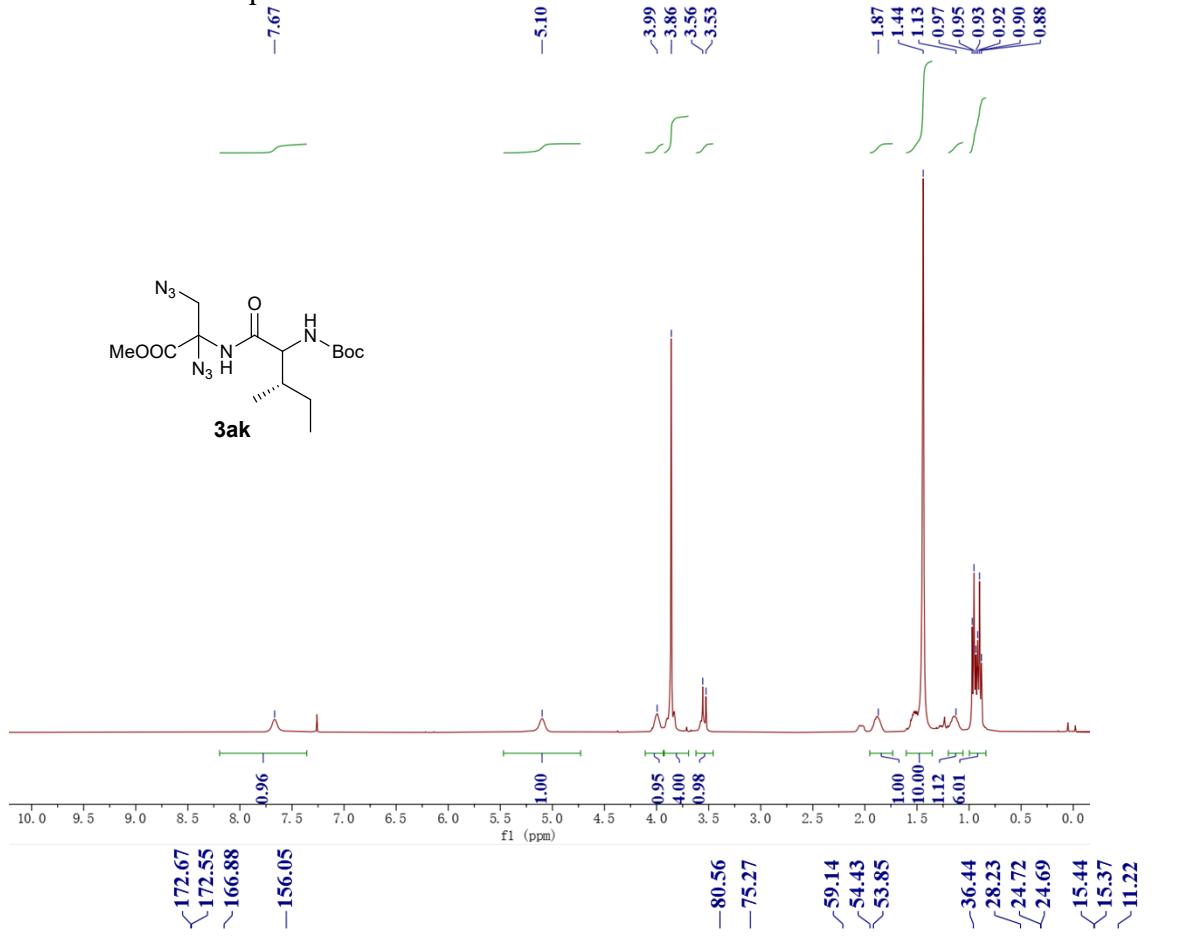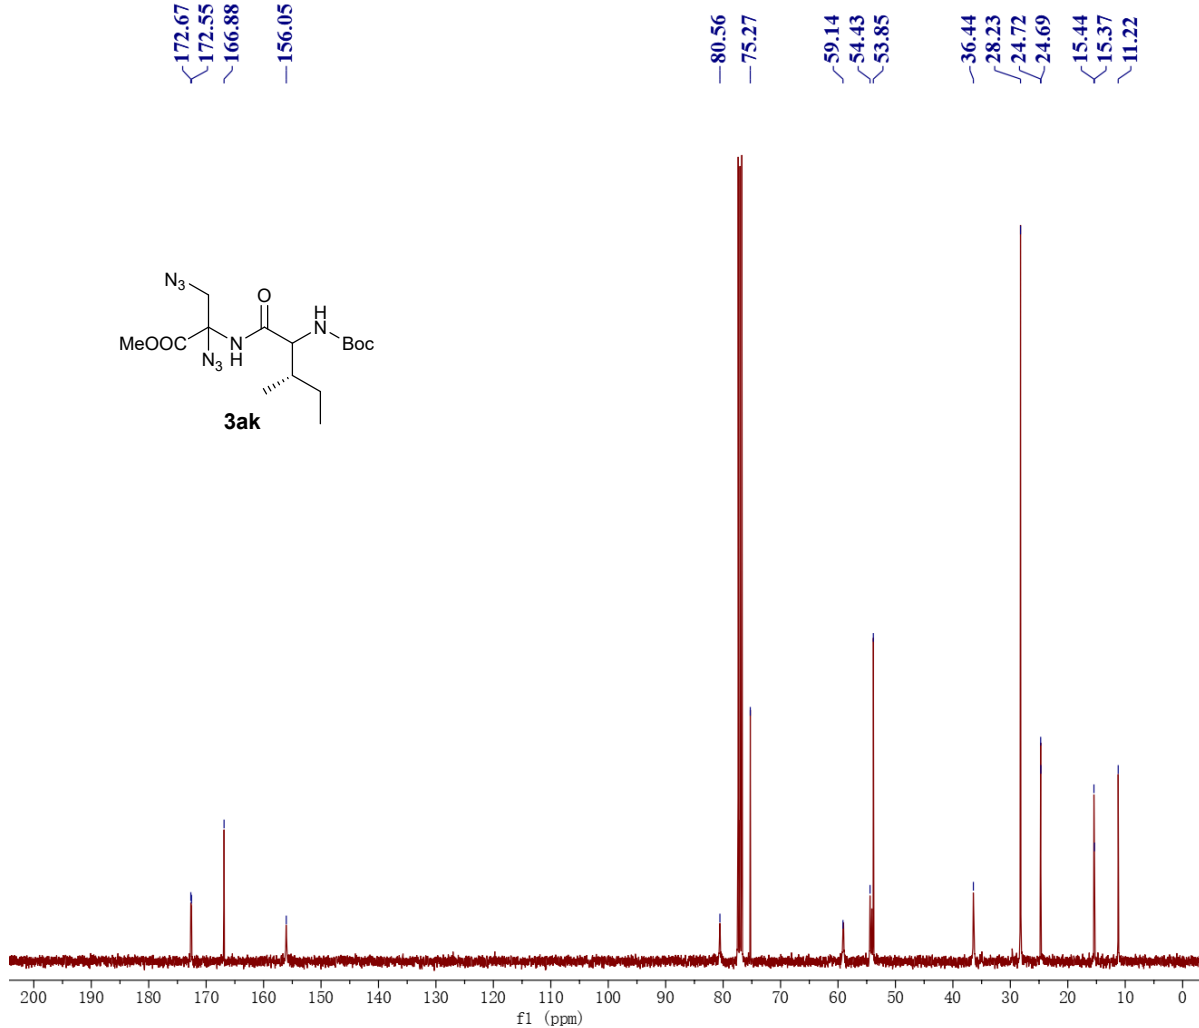

<sup>1</sup>H and <sup>13</sup>C NMR spectra of **3bf**

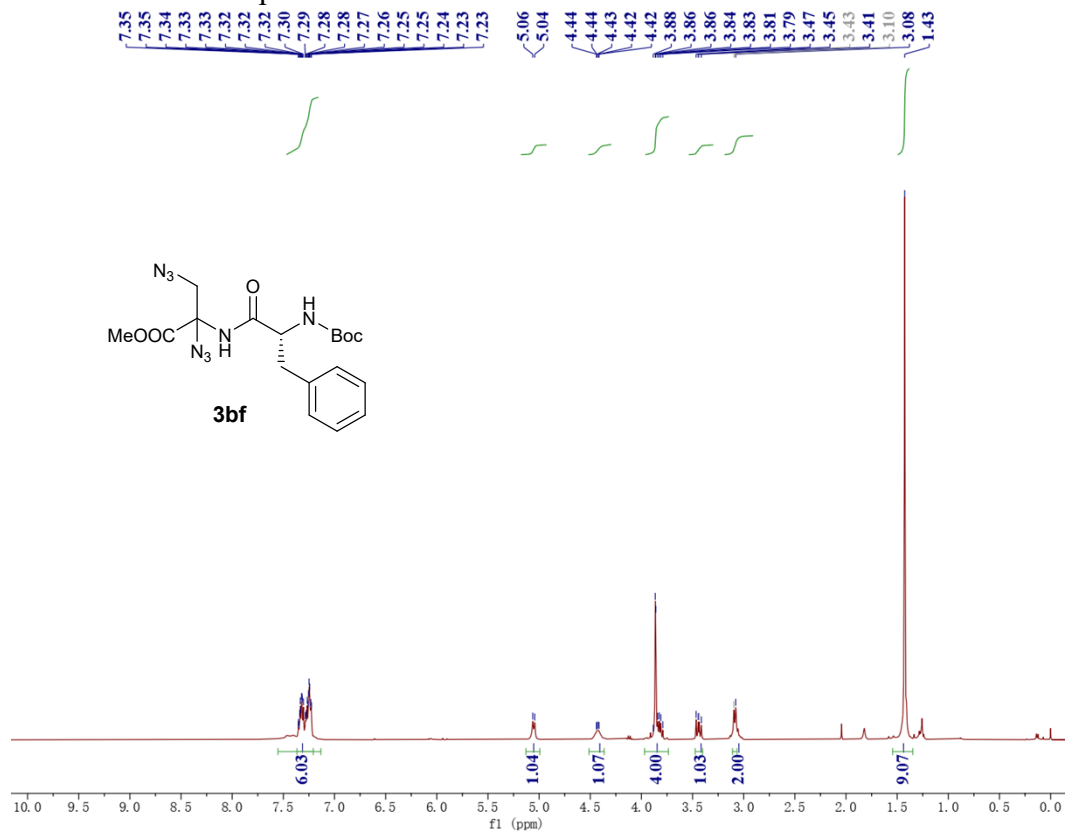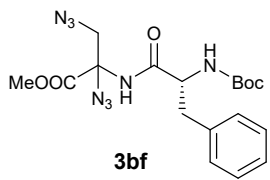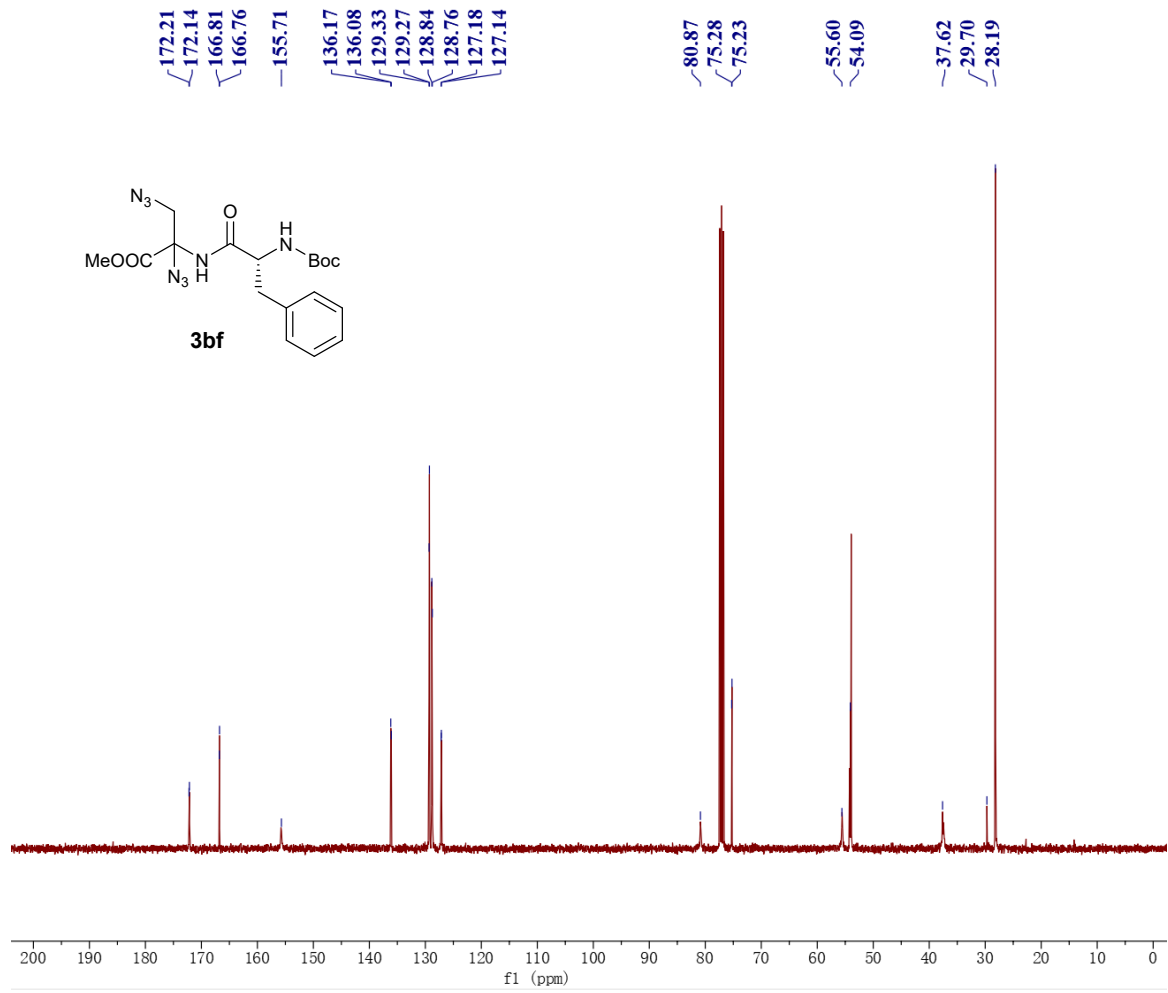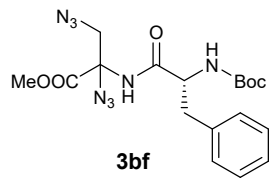

$^1\text{H}$  and  $^{13}\text{C}$  NMR spectra of **3bg**

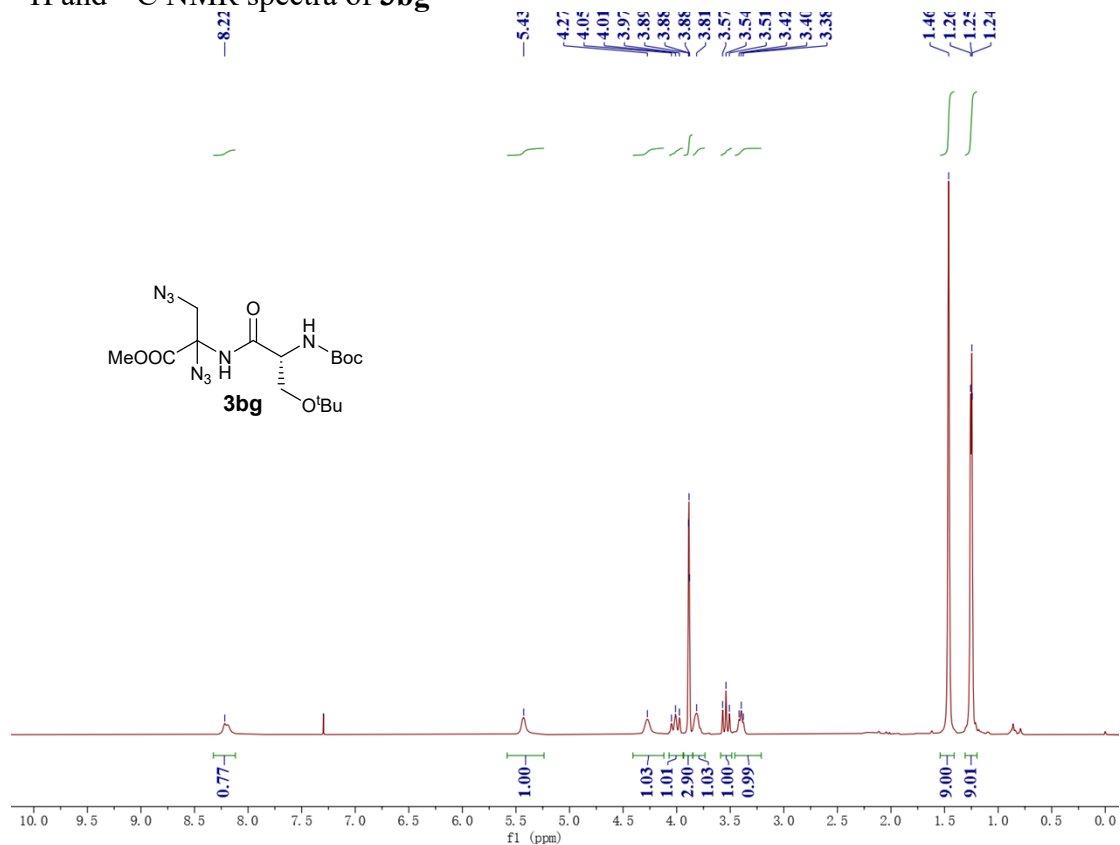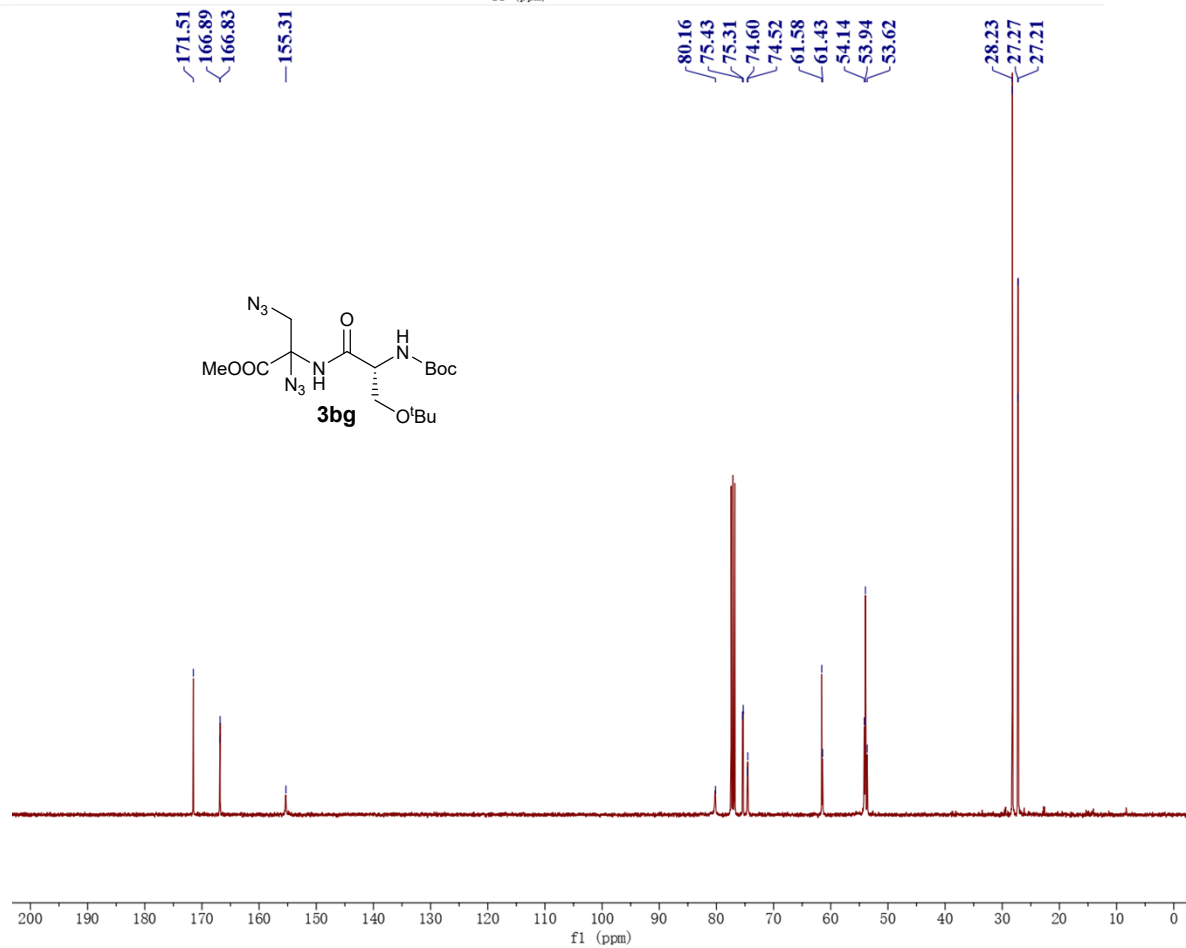

# $^1\text{H}$ and $^{13}\text{C}$ NMR spectra of **3ca**

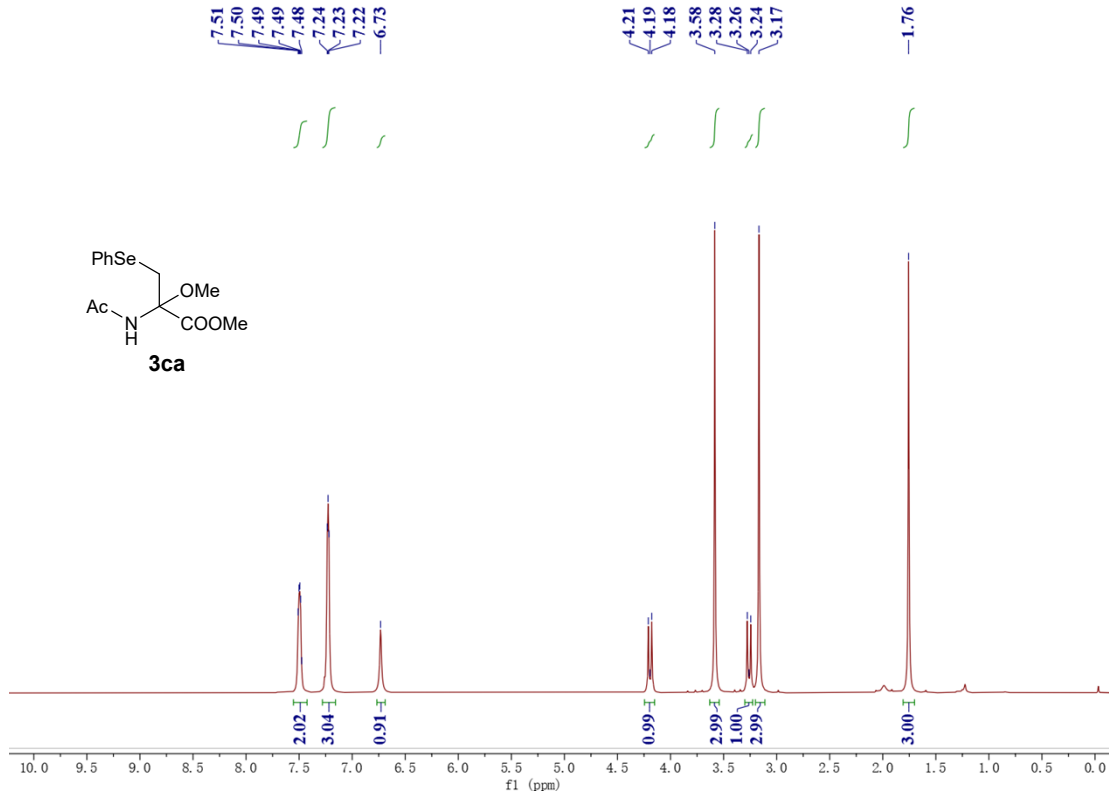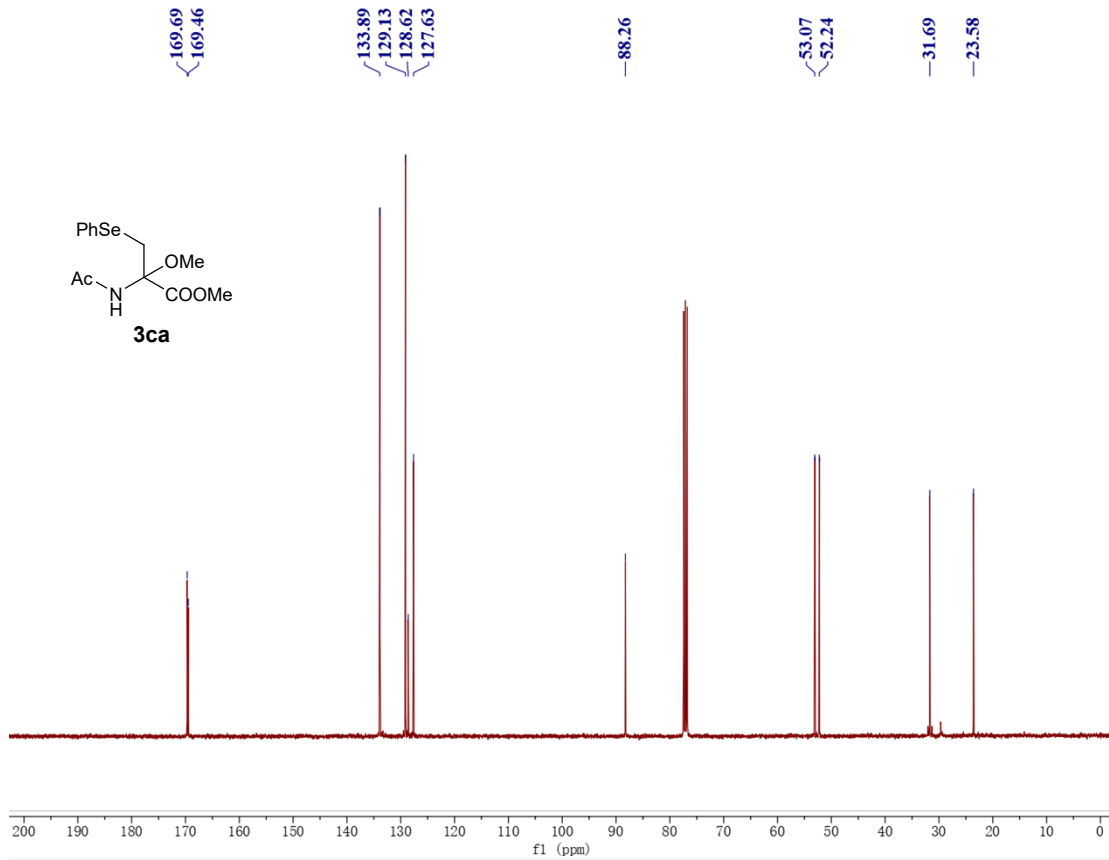

# $^1\text{H}$ and $^{13}\text{C}$ NMR spectra of **3cb**

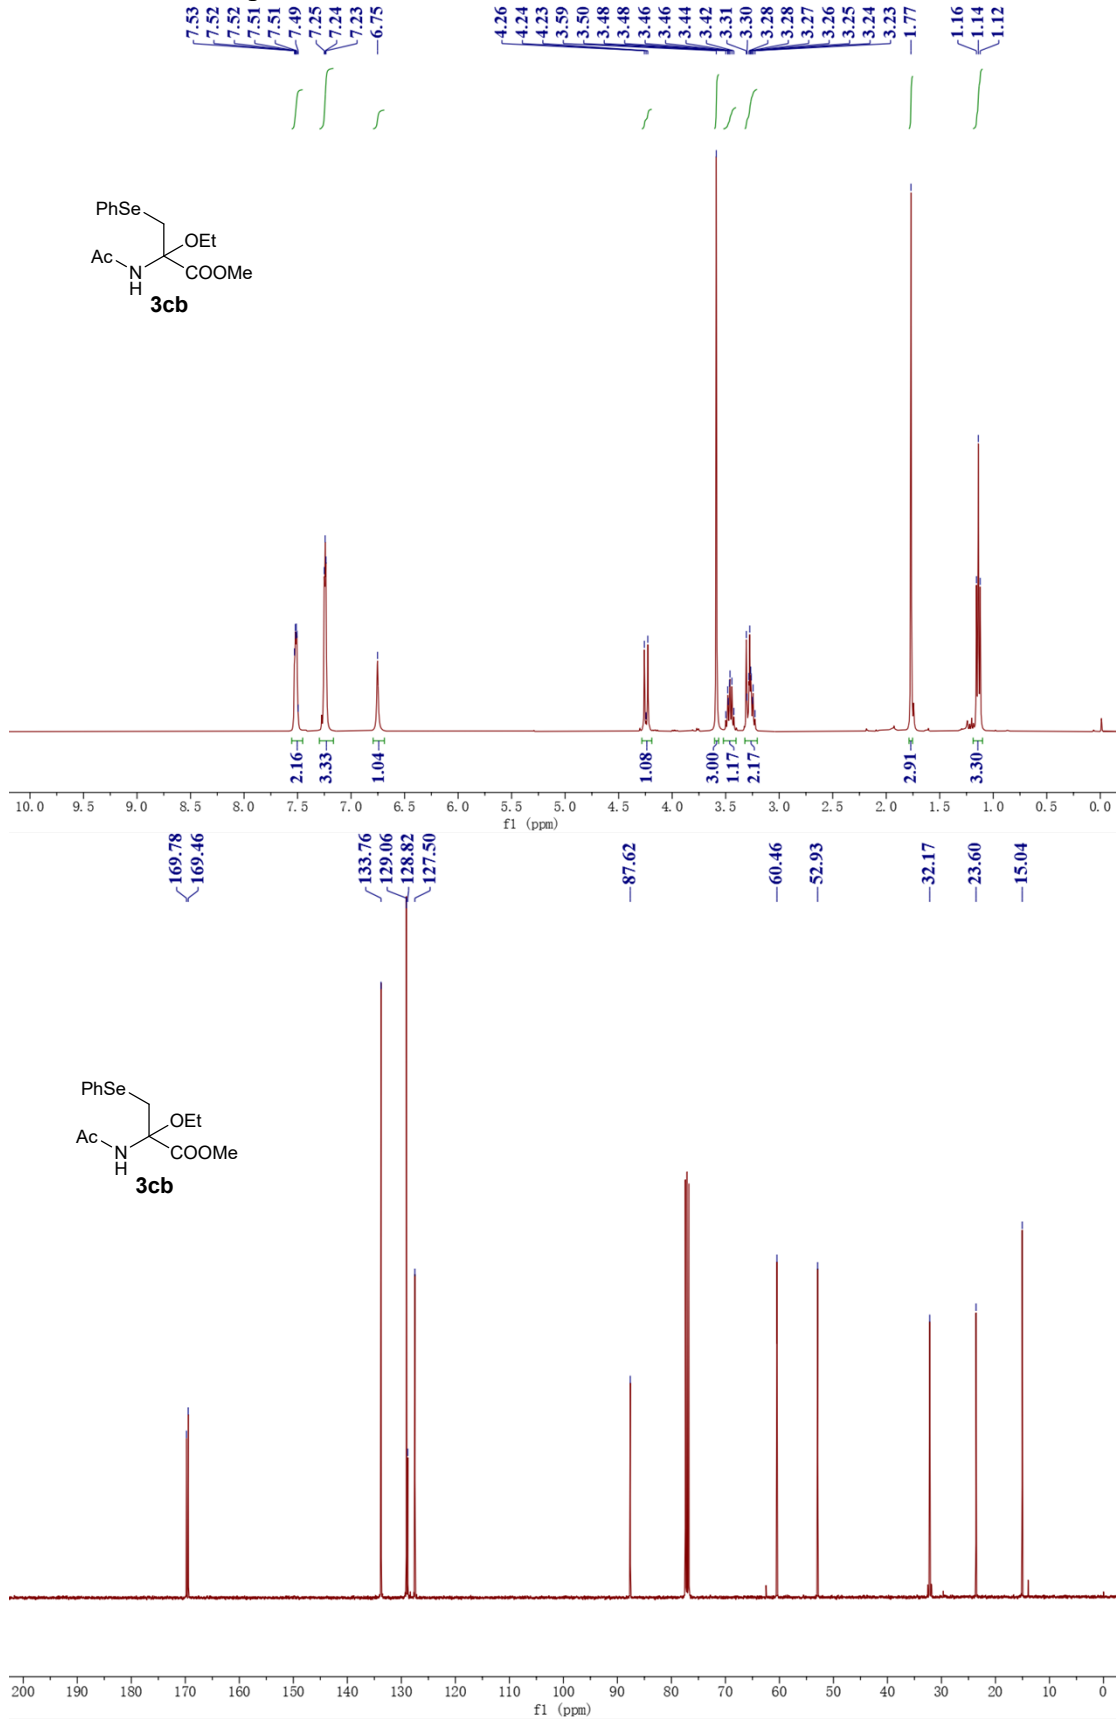

$^1\text{H}$  and  $^{13}\text{C}$  NMR spectra of **3cc**

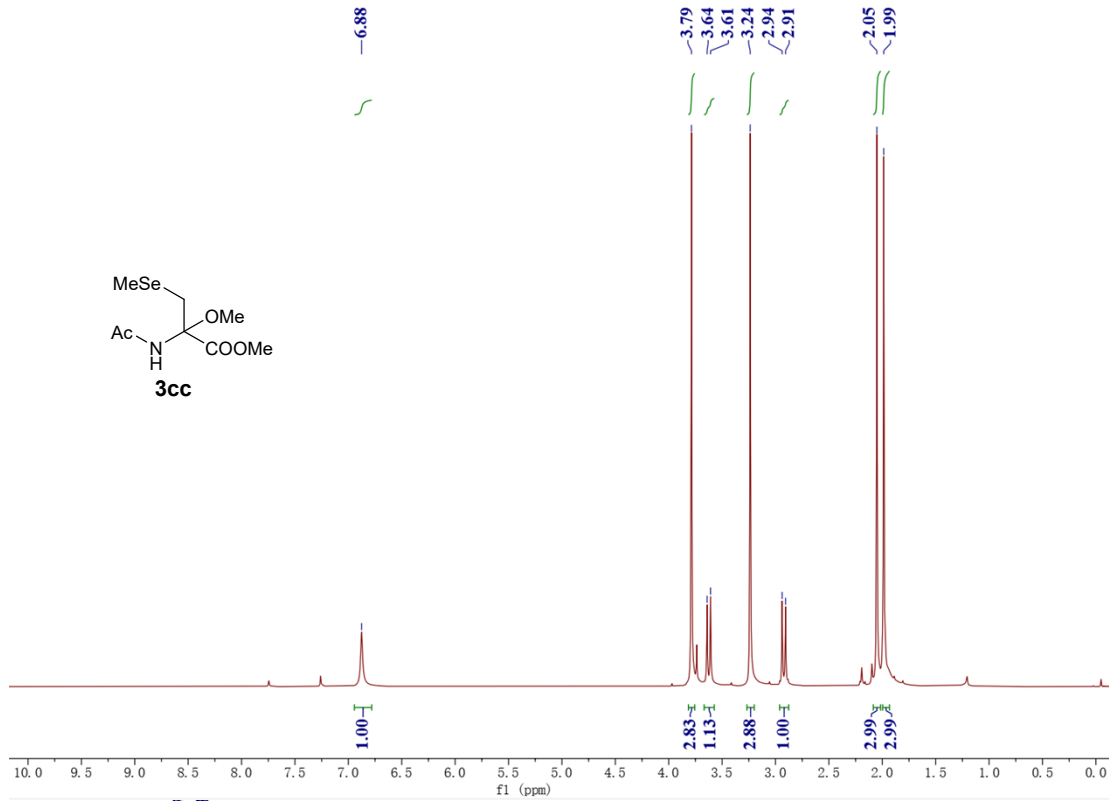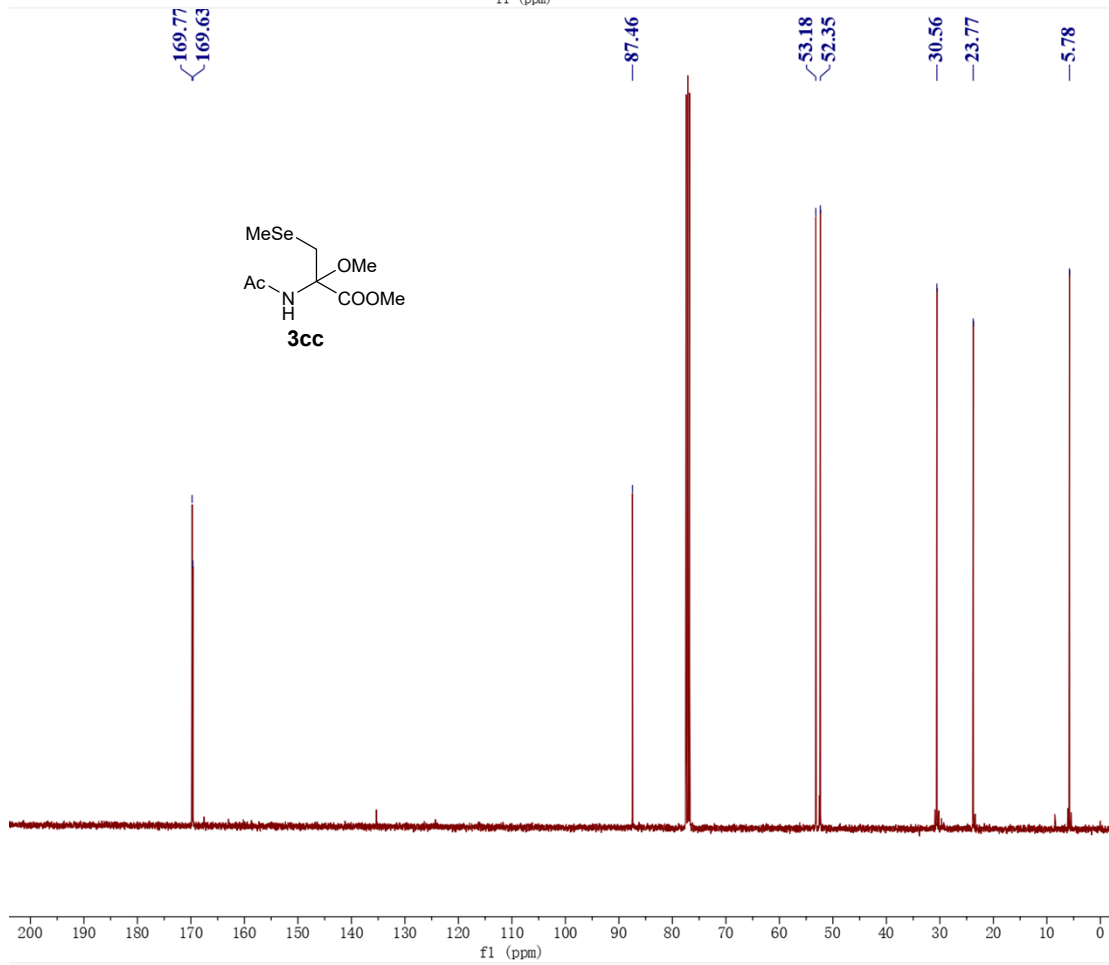

$^1\text{H}$  and  $^{13}\text{C}$  NMR spectra of **3cd**

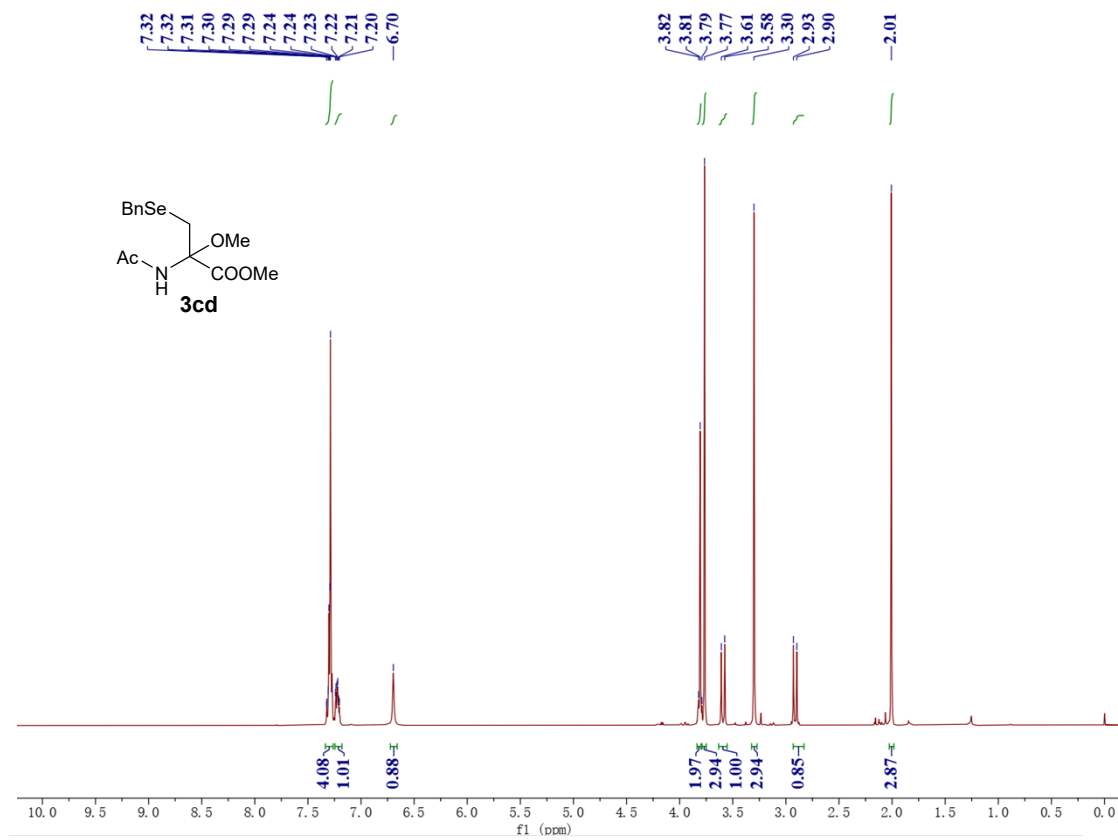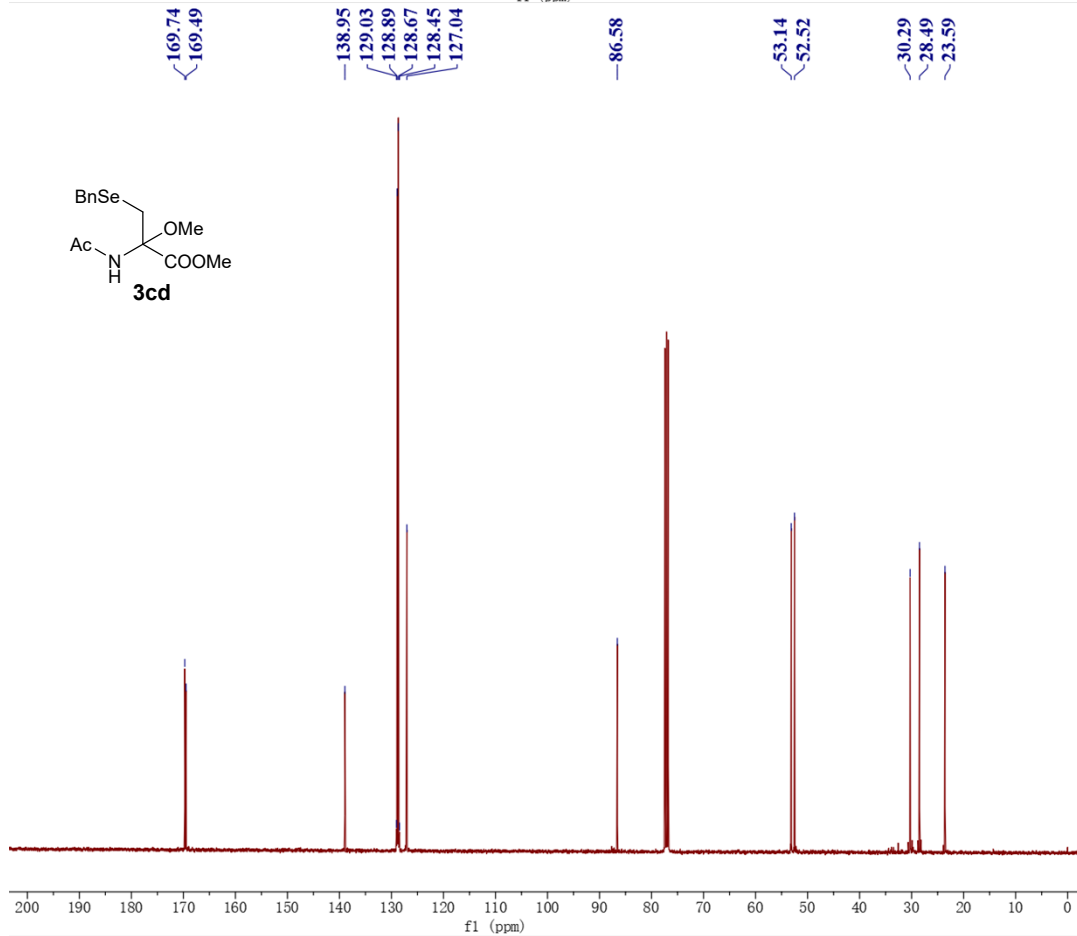



$^1\text{H}$  and  $^{13}\text{C}$  NMR spectra of **3ce**

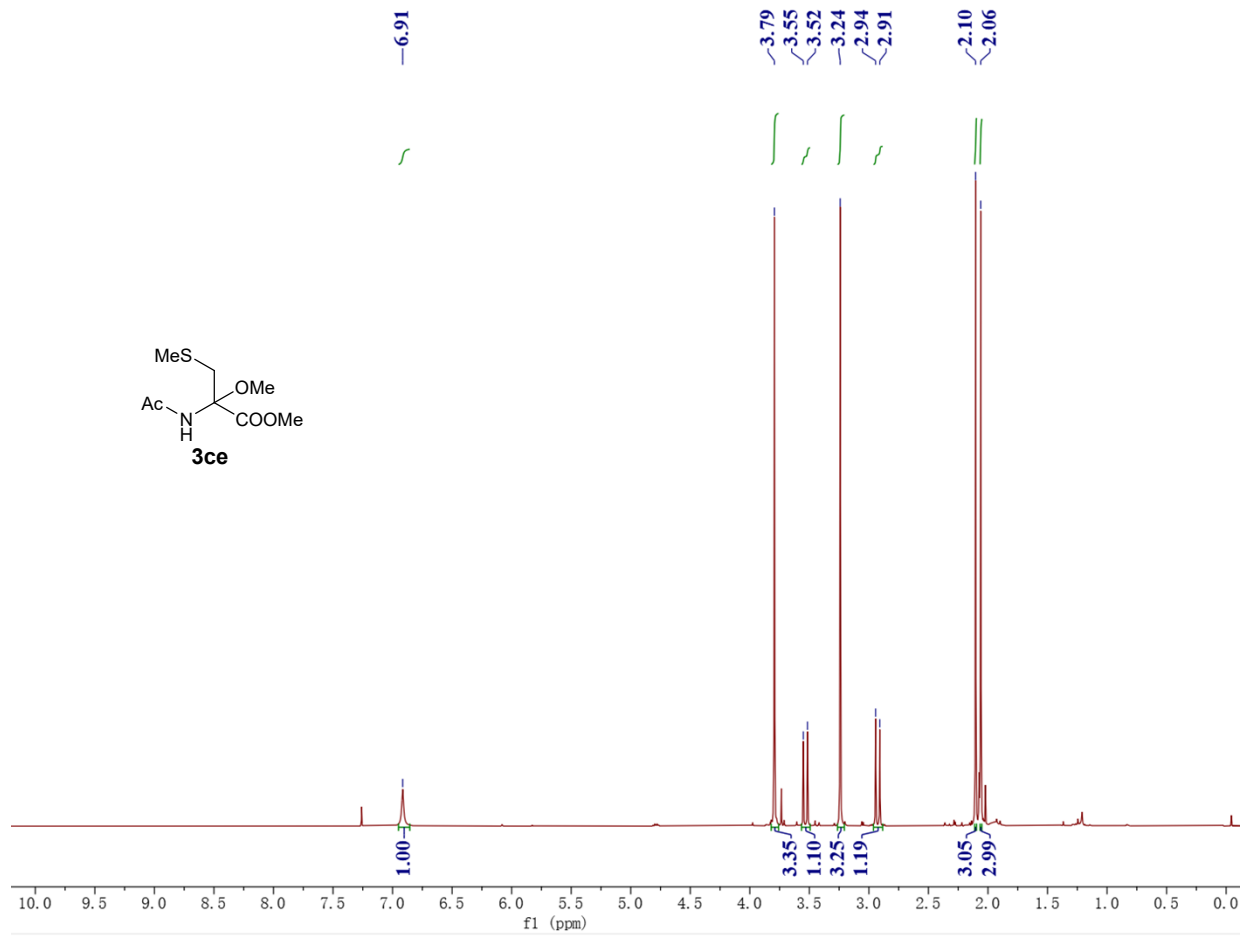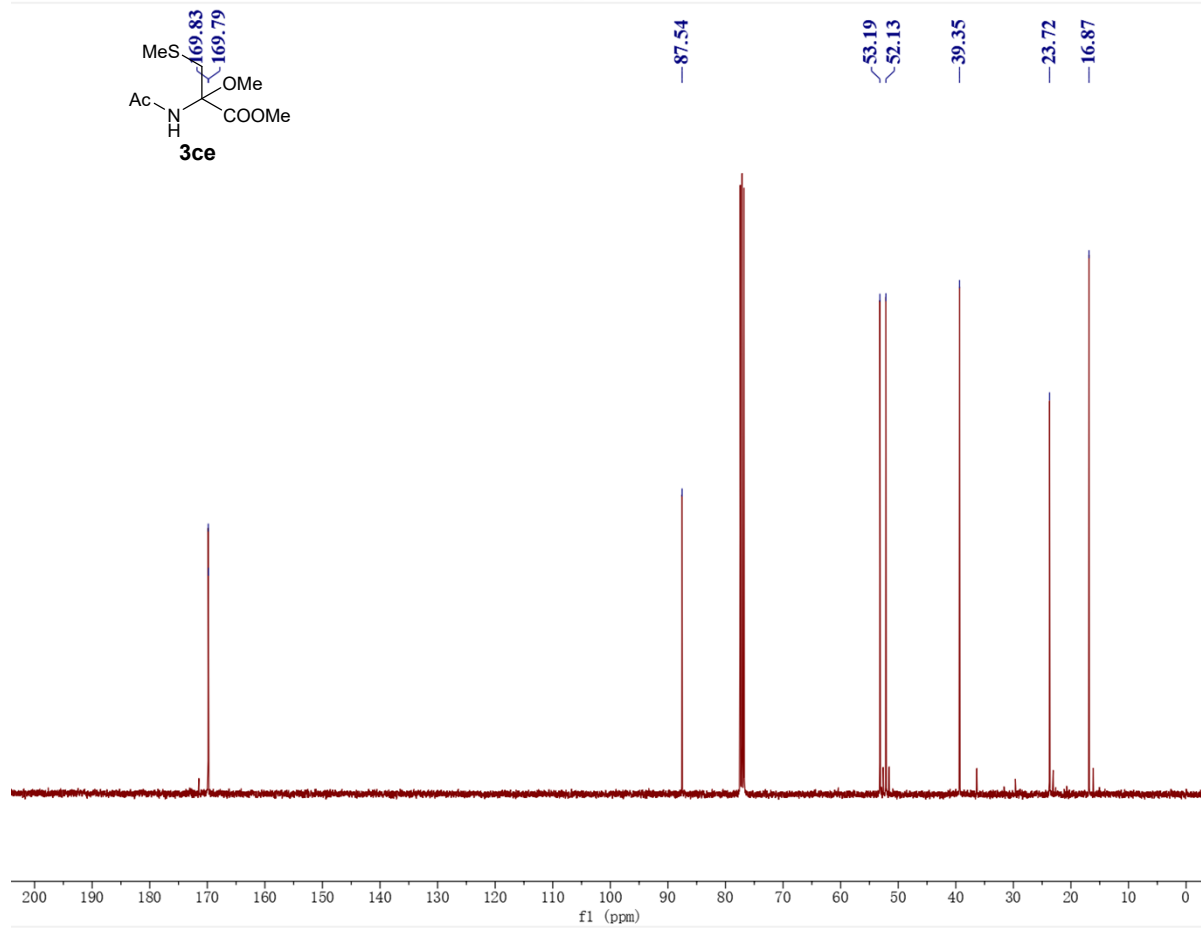

# $^1\text{H}$ and $^{13}\text{C}$ NMR spectra of **3cf**

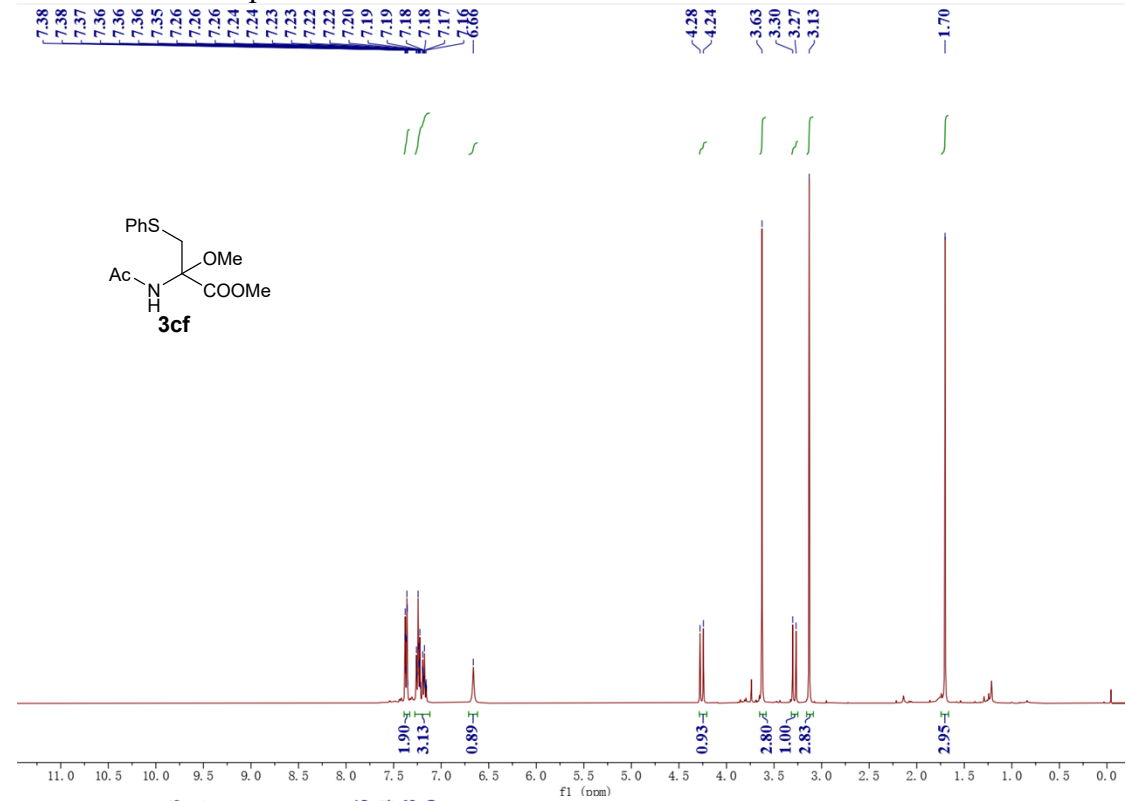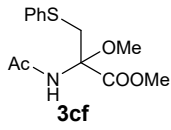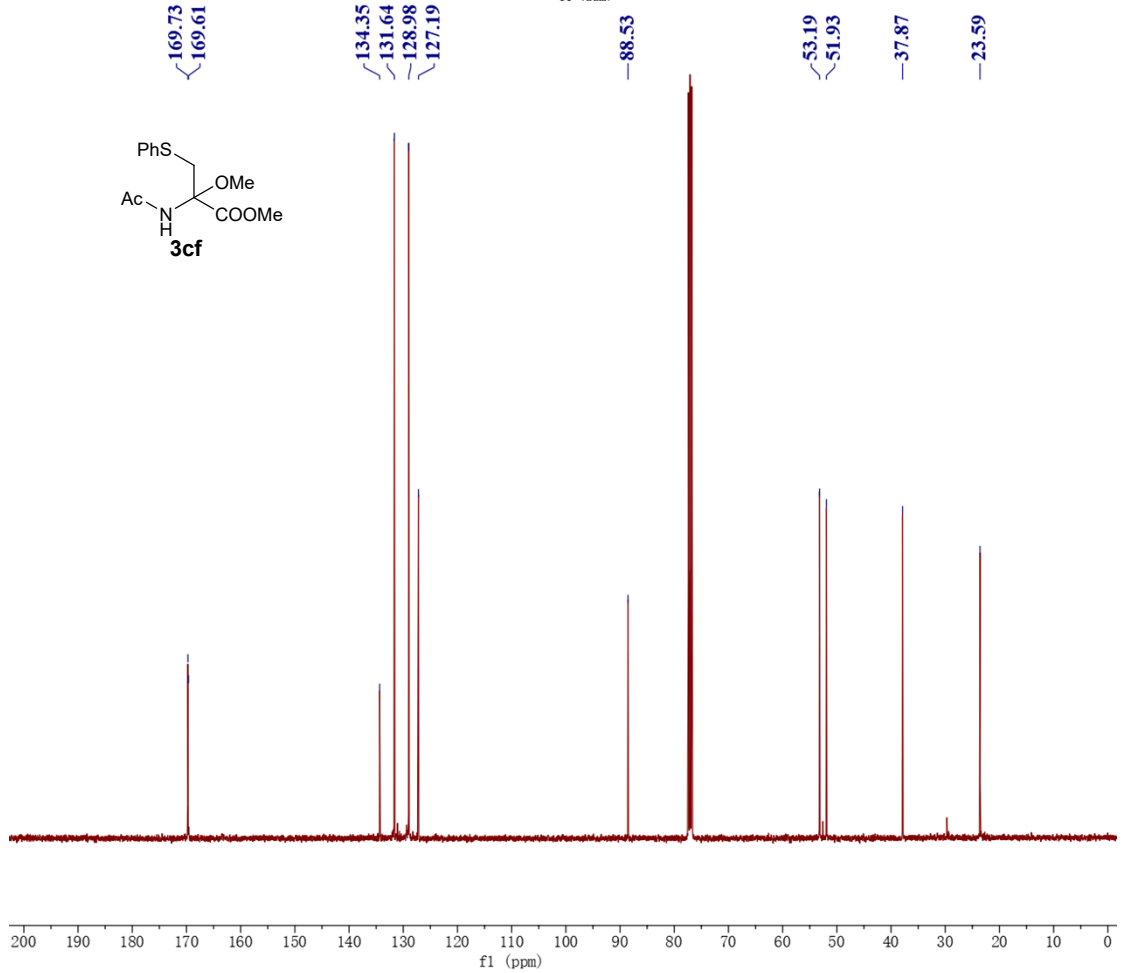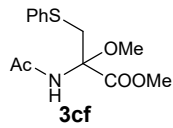

# <sup>1</sup>H and <sup>13</sup>C NMR spectra of **3cg**

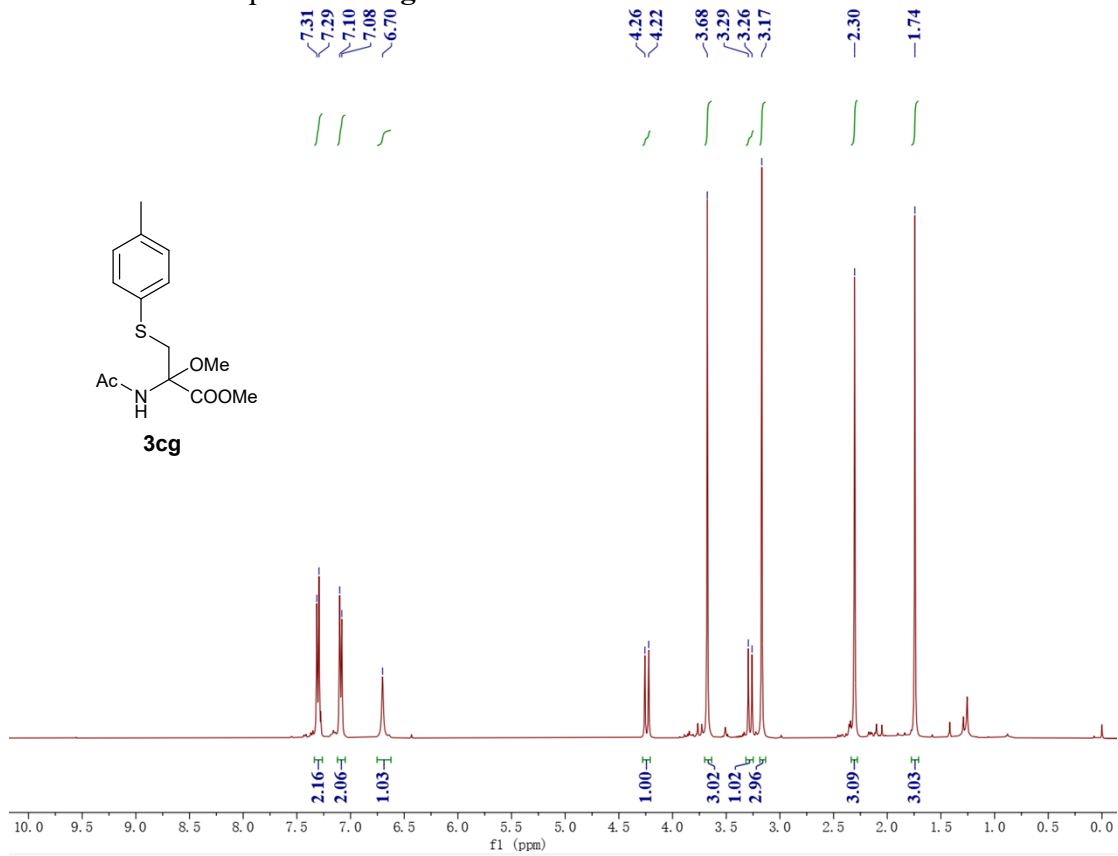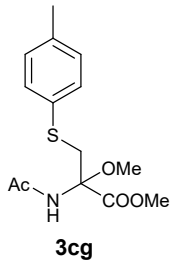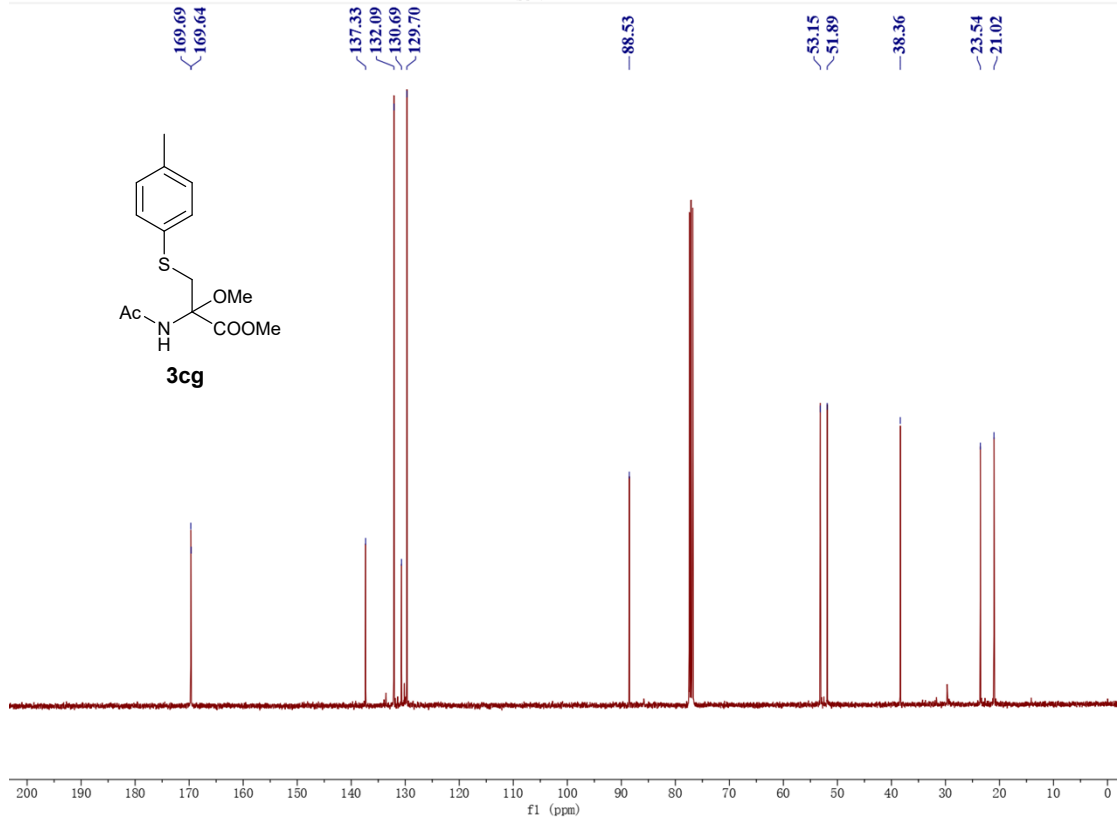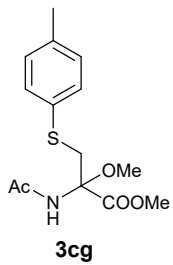

<sup>1</sup>H and <sup>13</sup>C NMR spectra of **3ch**

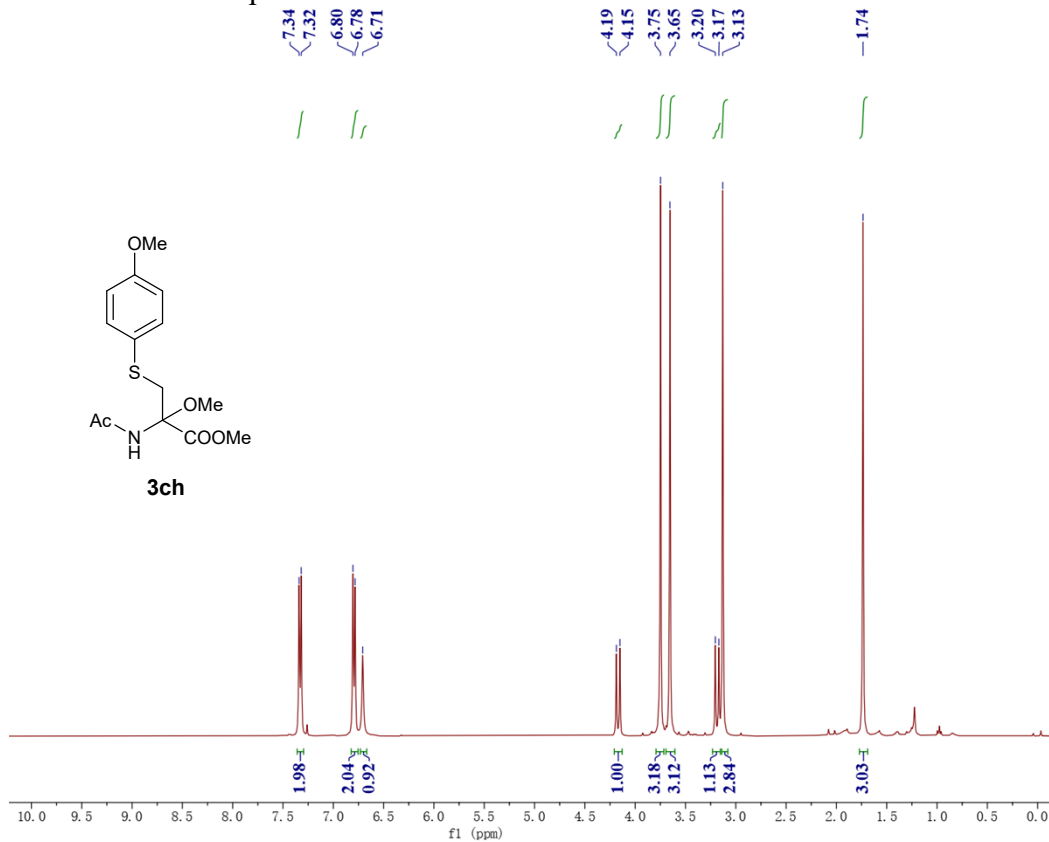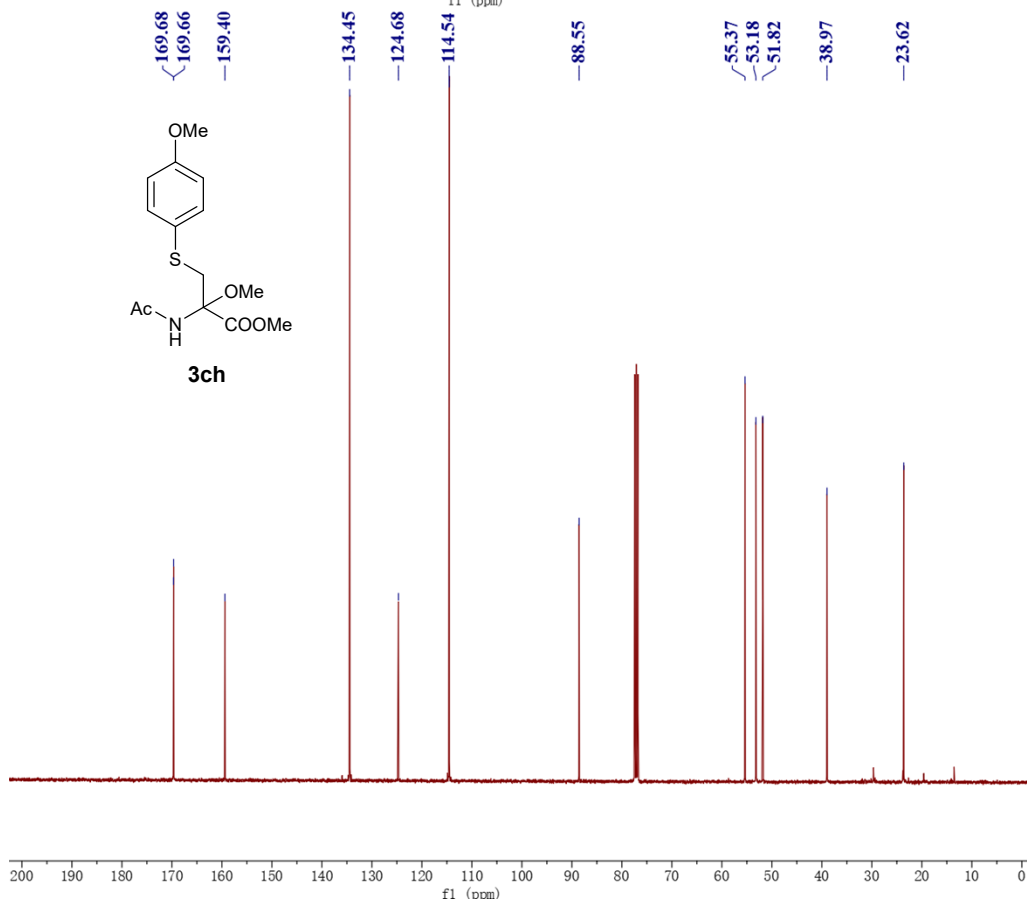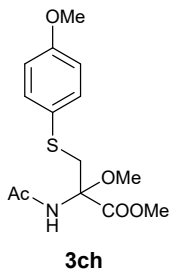

<sup>1</sup>H and <sup>13</sup>C NMR spectra of **3ci**

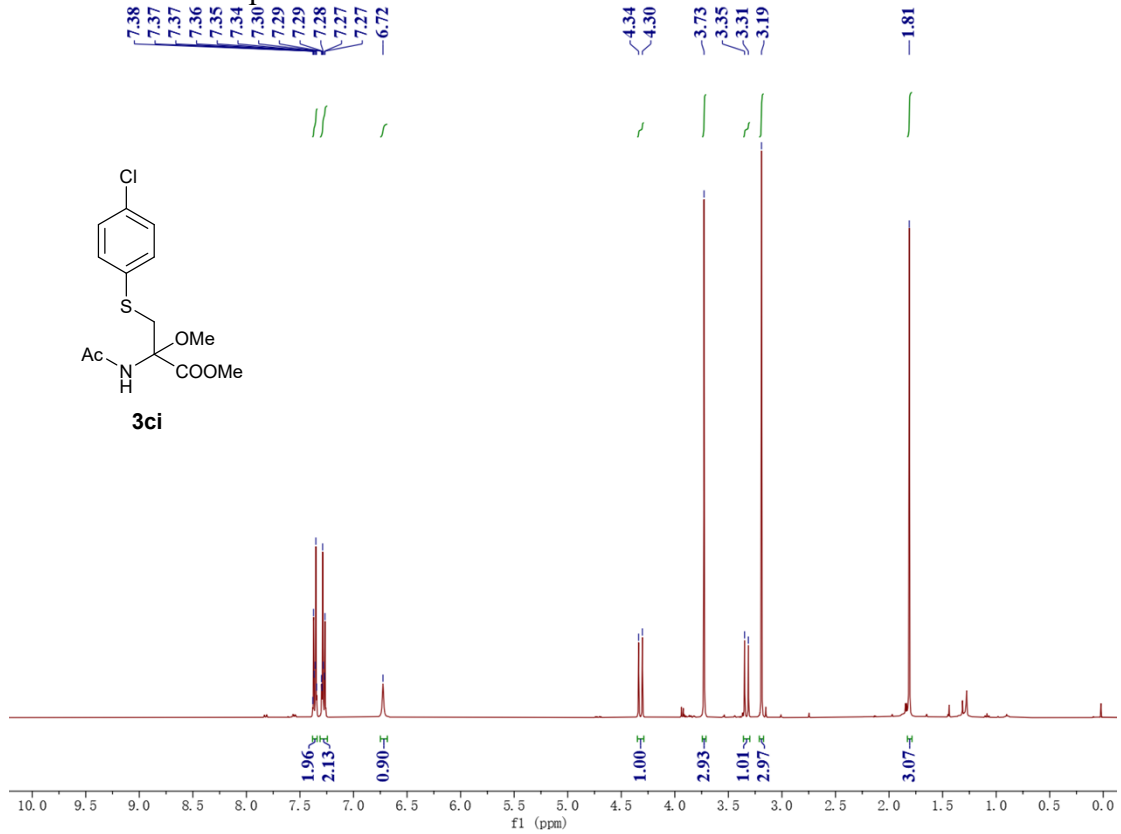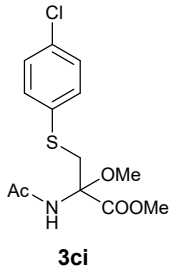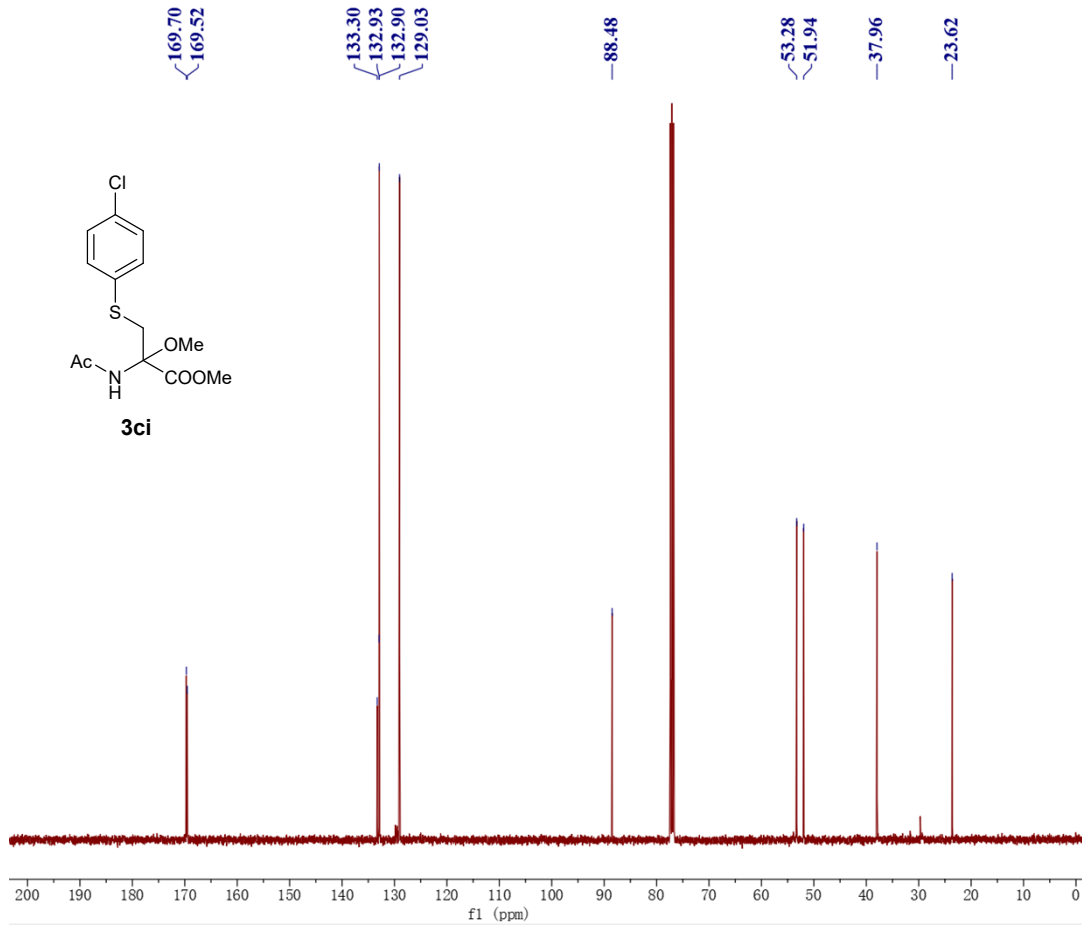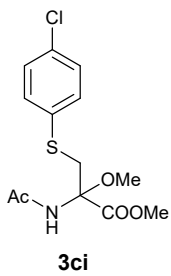

<sup>1</sup>H and <sup>13</sup>C NMR spectra of **3cj**

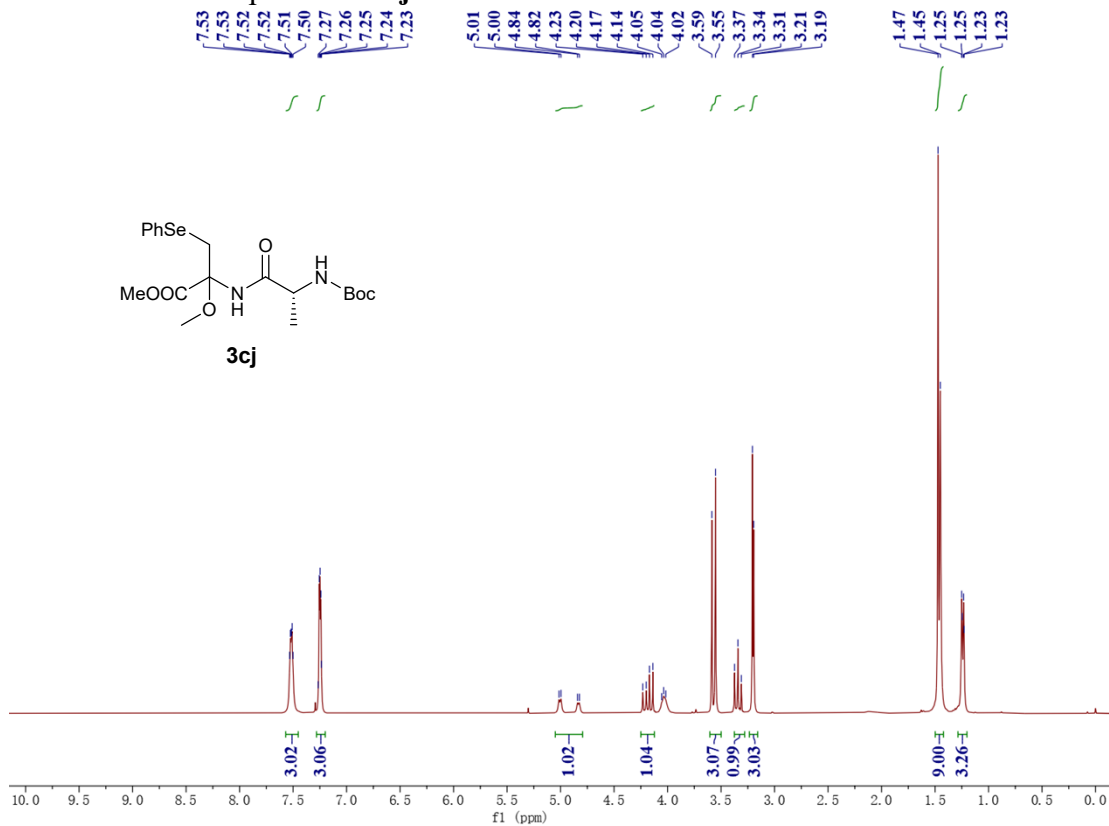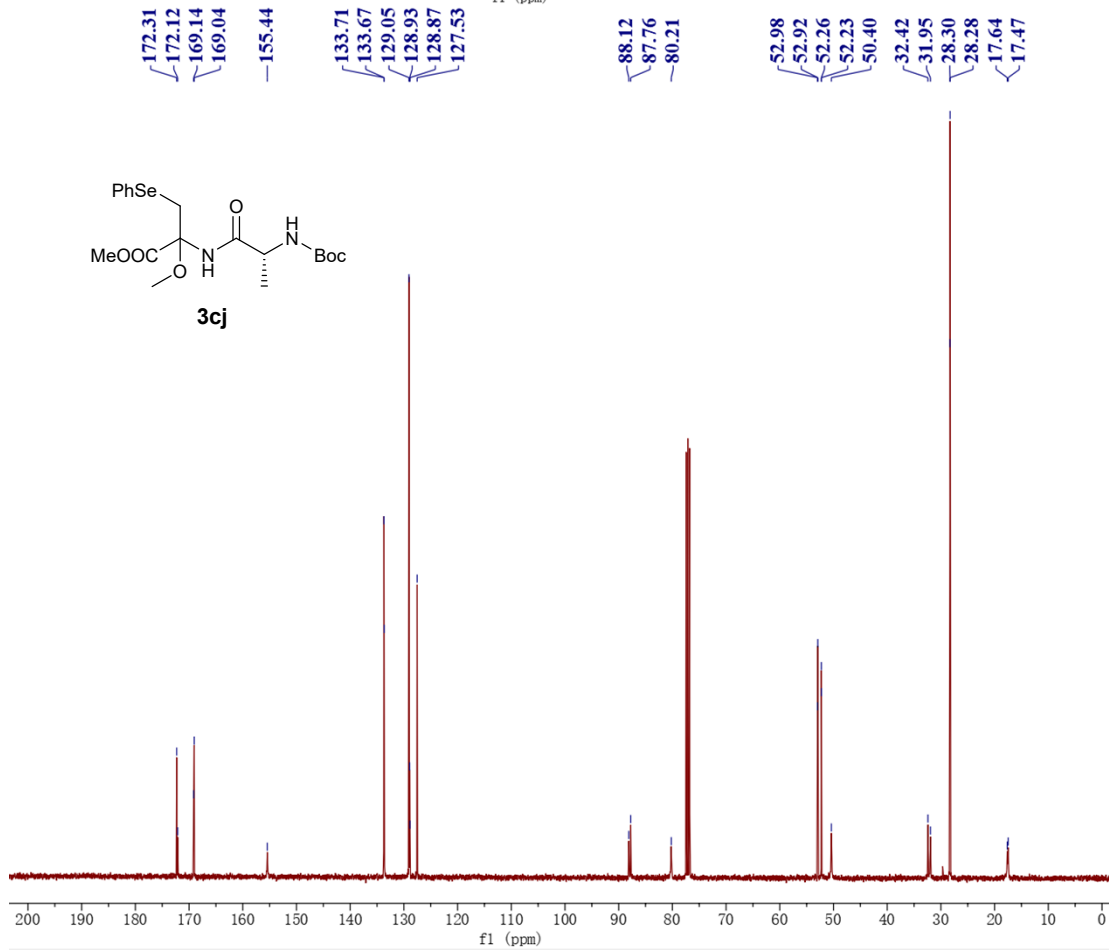

<sup>1</sup>H and <sup>13</sup>C NMR spectra of **3ck**

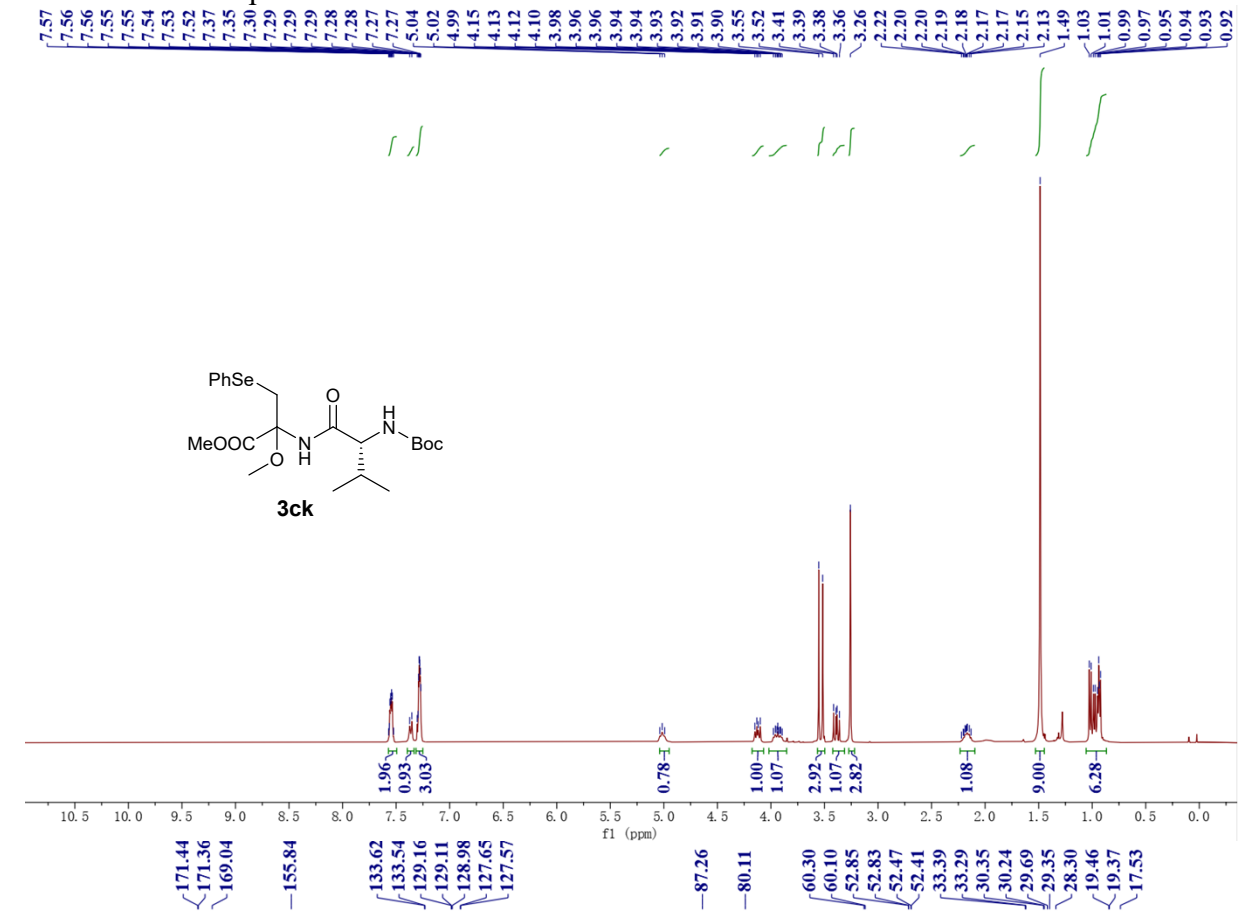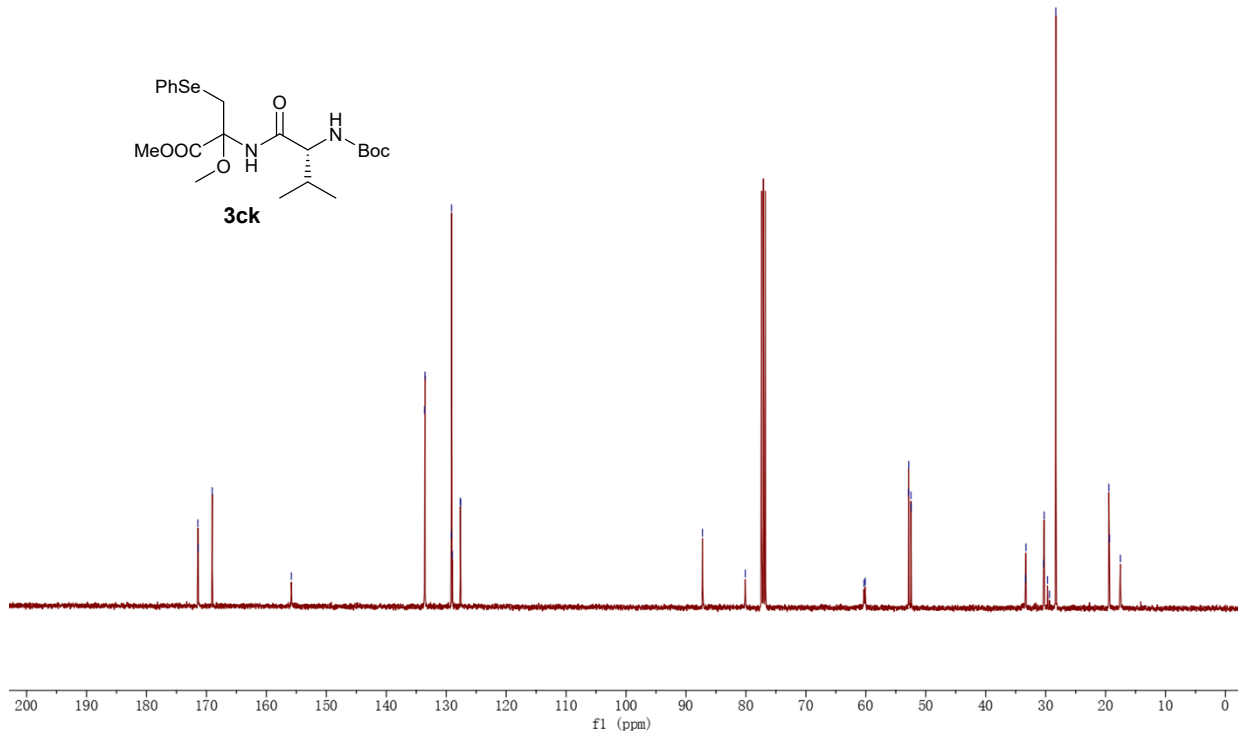

# <sup>1</sup>H and <sup>13</sup>C NMR spectra of **3cl**

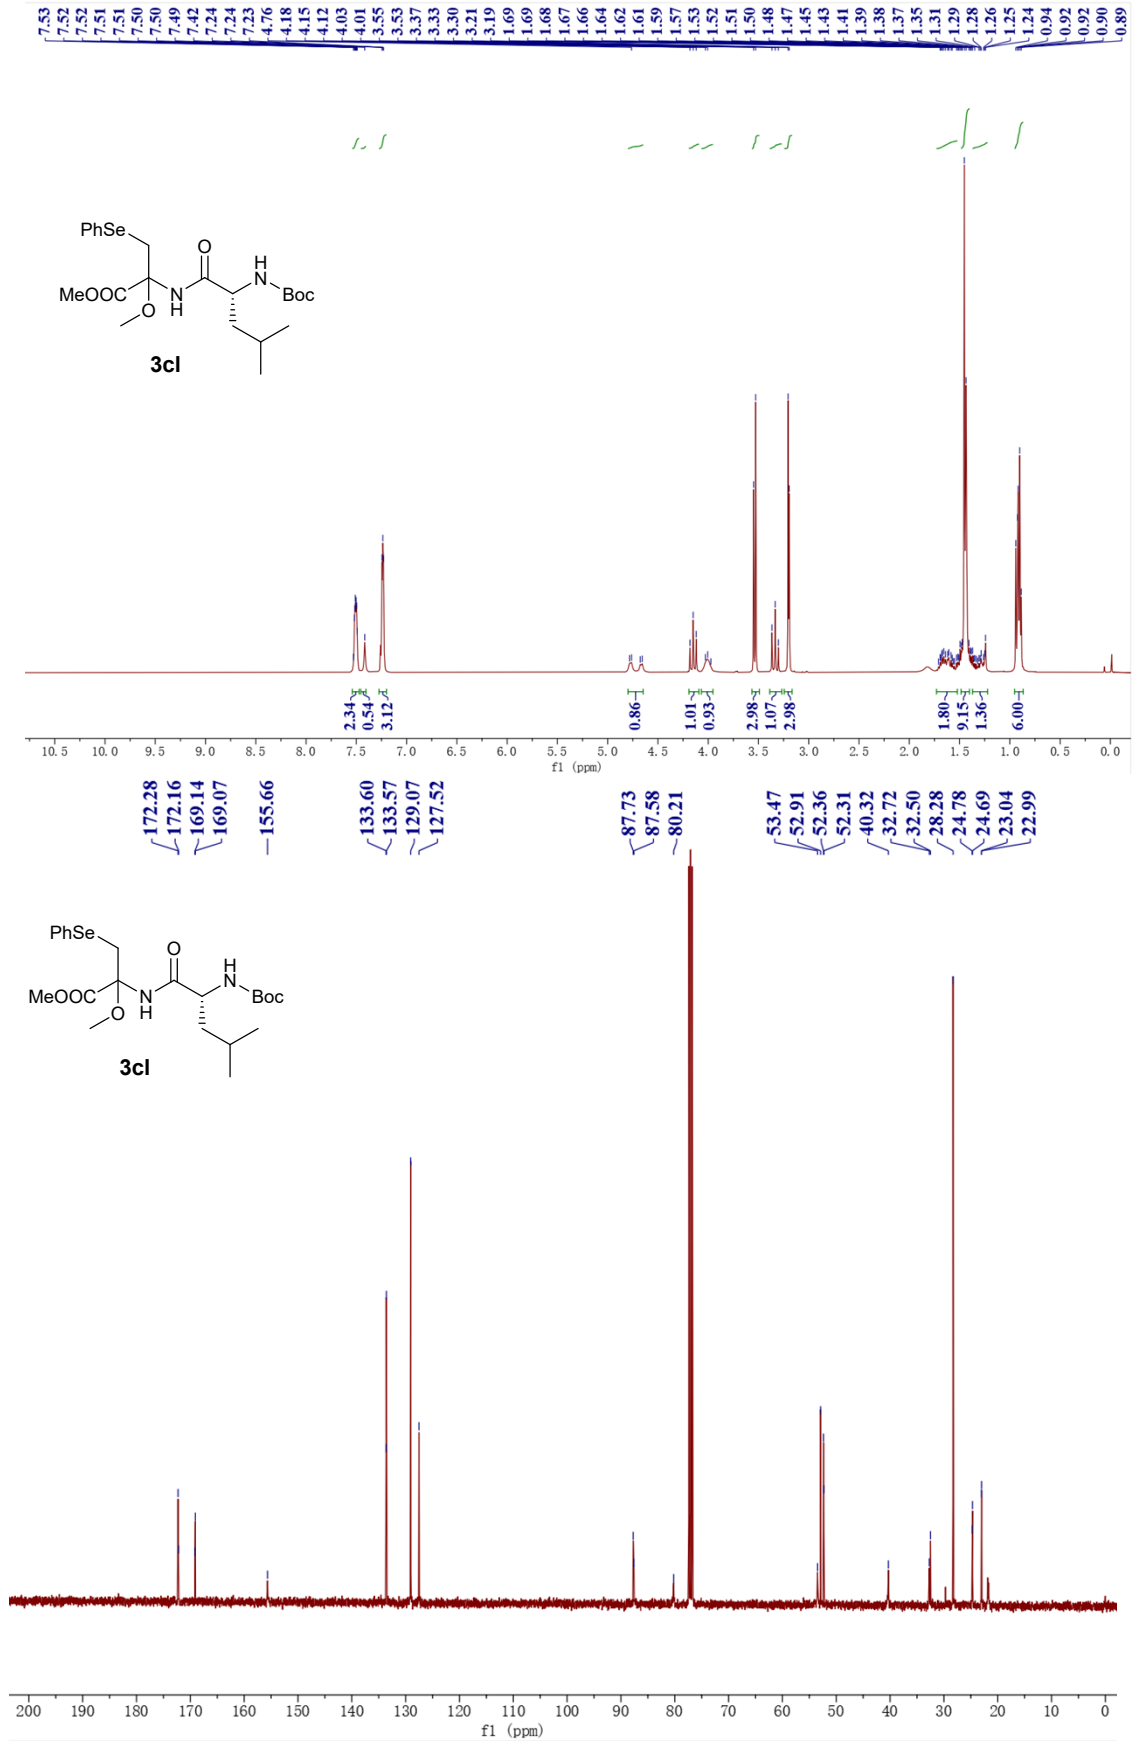



# <sup>1</sup>H and <sup>13</sup>C NMR spectra of **3cm**

7.53 7.52 7.51 7.51 7.50 7.50 7.49 7.49 7.36 7.25 7.24 7.24 7.23 7.23 7.22 5.06 5.04 5.02 4.11 4.08 4.05 4.01 3.97 3.97 3.51 3.46 3.38 3.36 3.34 3.33 3.22 1.87 1.86 1.85 1.85 1.51 1.50 1.44 1.13 1.13 1.12 1.11 1.10 1.09 1.08 1.08 0.95 0.94 0.92 0.92 0.90 0.88 0.86

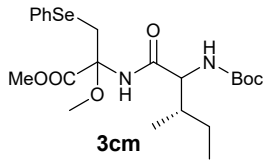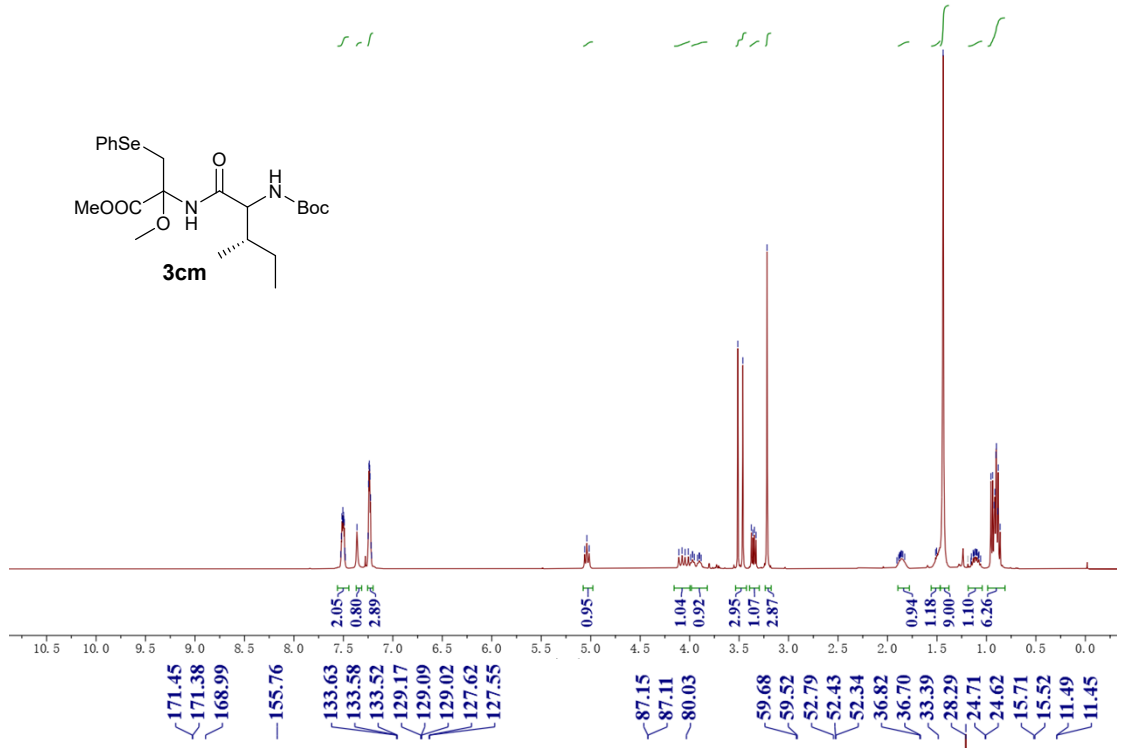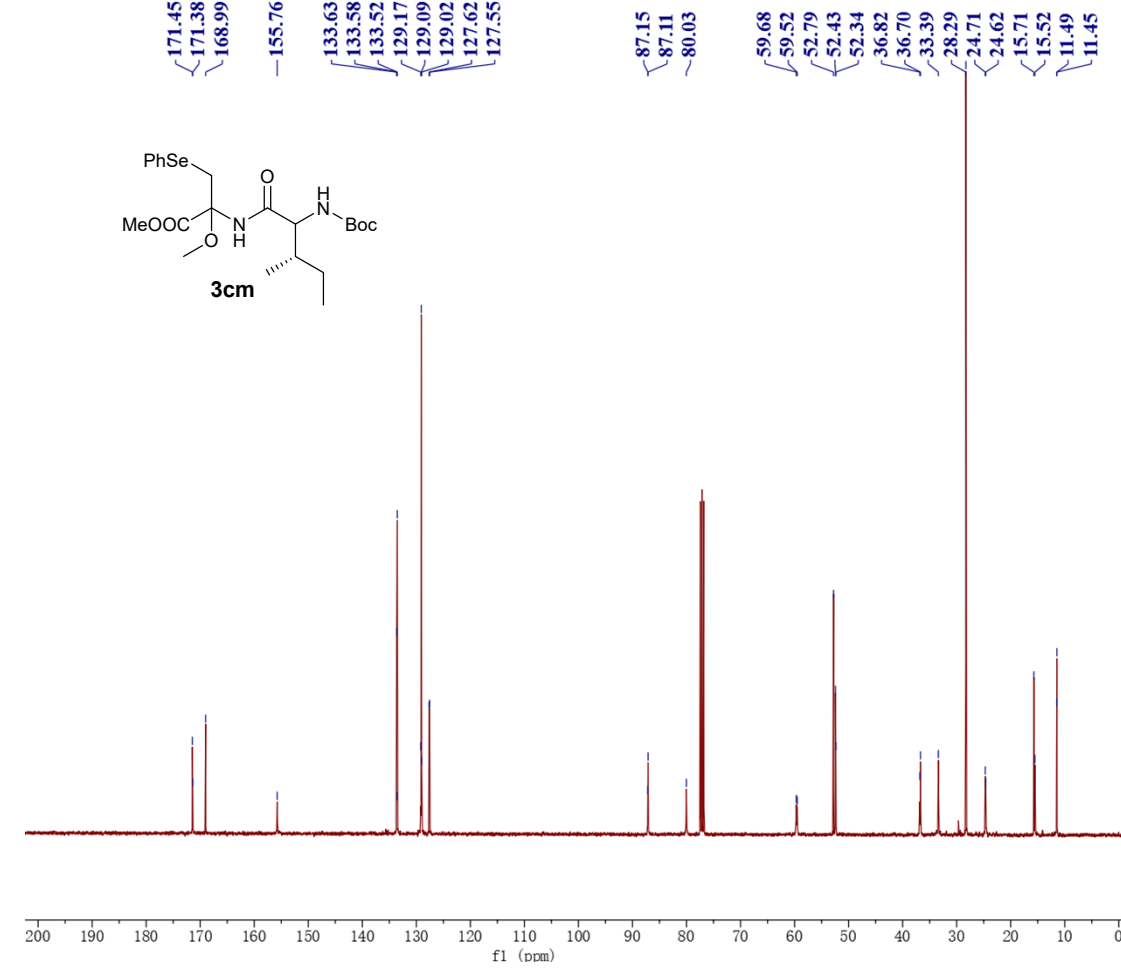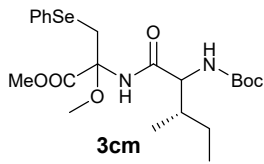

<sup>1</sup>H and <sup>13</sup>C NMR spectra of **3cn**

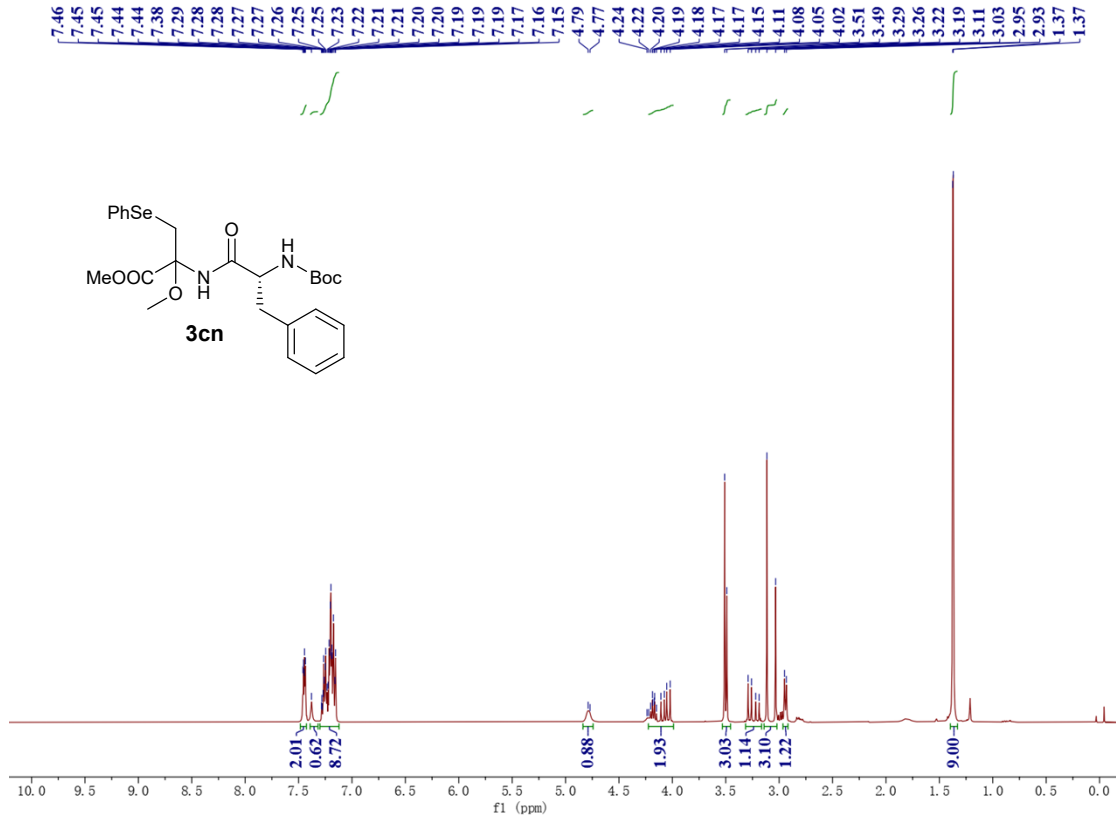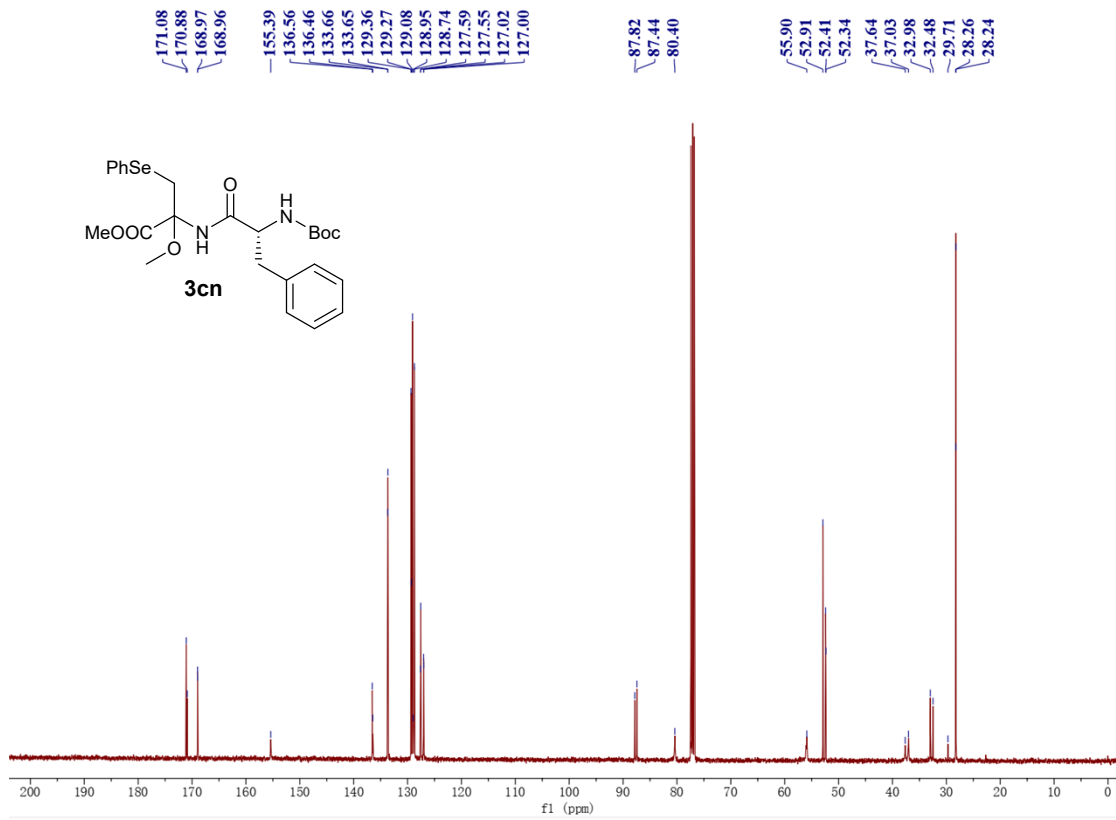

# $^1\text{H}$ and $^{13}\text{C}$ NMR spectra of **3co**

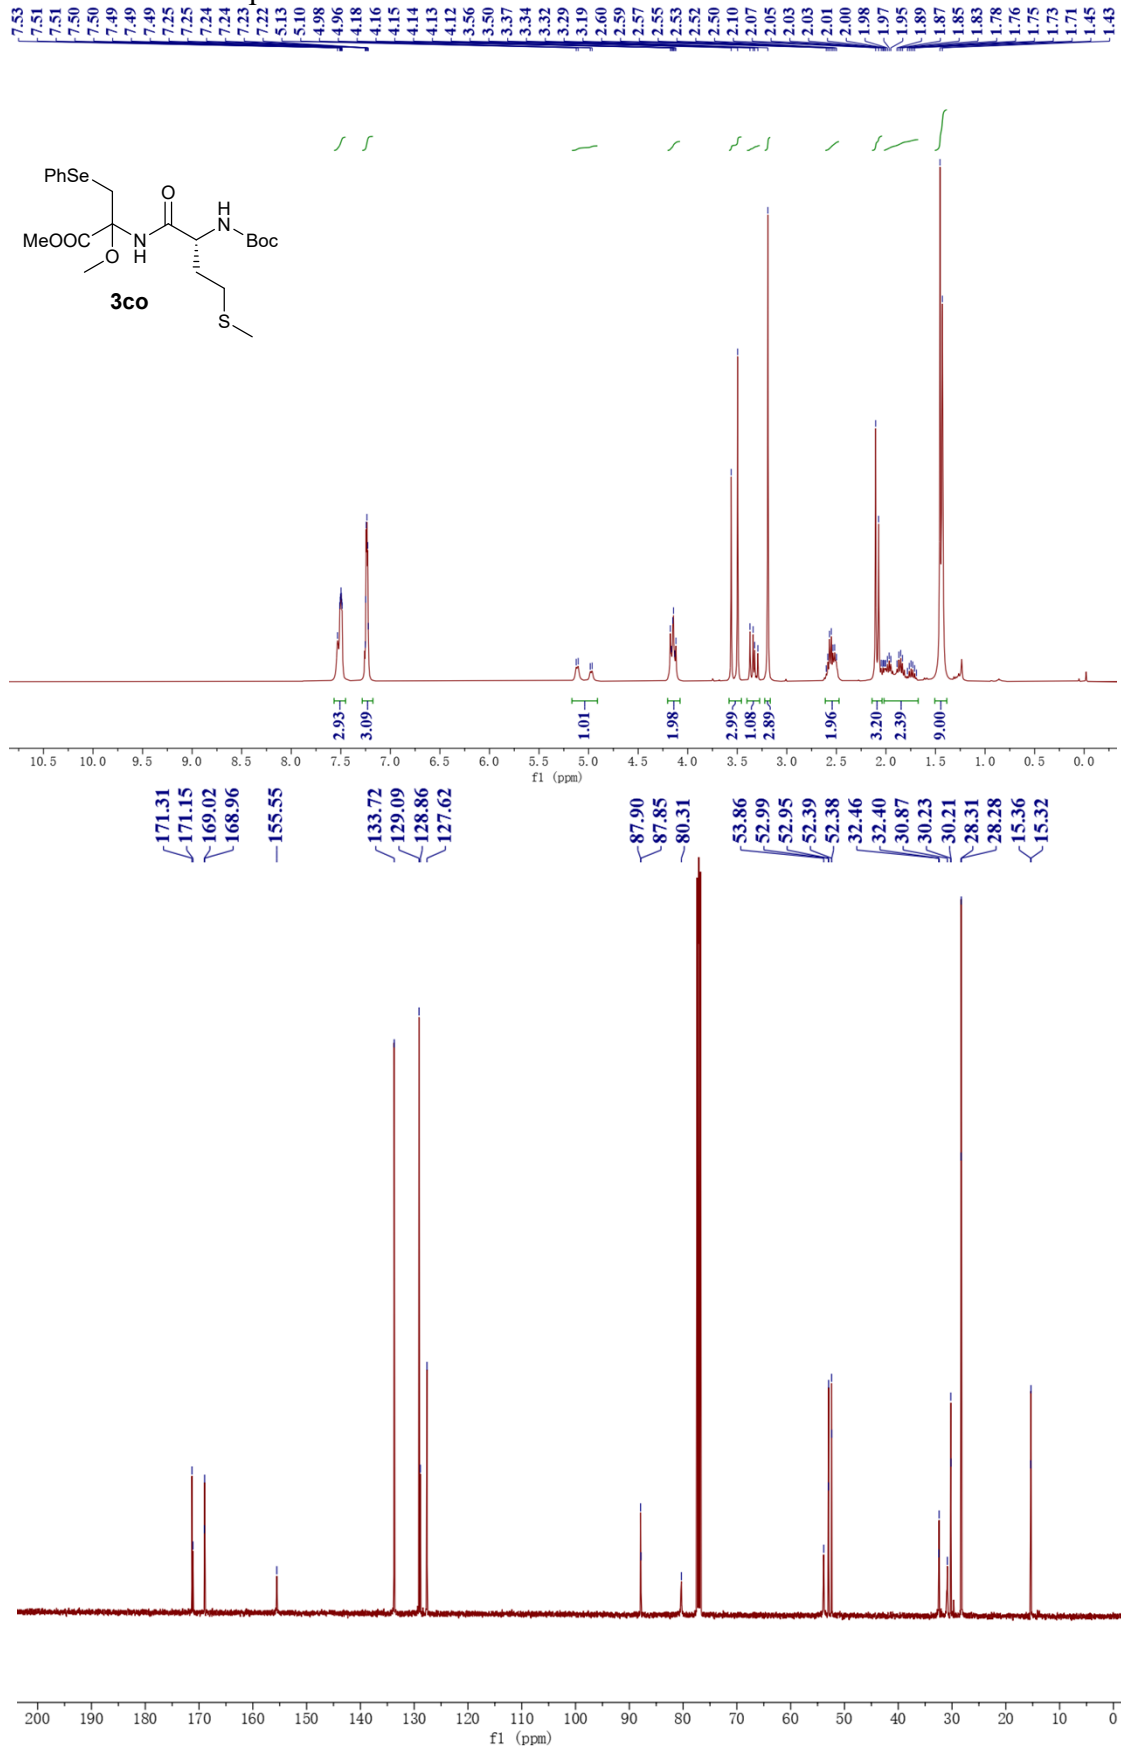

# <sup>1</sup>H and <sup>13</sup>C NMR spectra of **3cp**

7.51 7.50 7.50 7.49 7.49 7.48 7.48 7.48 7.48 7.43 7.43 7.42 7.41 7.41 7.40 7.39 7.39 7.39 7.37 7.37 7.37 7.35 7.35 7.33 7.33 7.32 7.32 7.31 7.31 7.25 7.24 7.24 7.24 7.23 7.23 7.22 7.14 7.13 7.12 7.12 6.93 6.92 6.90 6.90 5.03 5.03 4.12 4.12 4.08 4.05 3.55 3.52 3.33 3.30 3.28 3.15 3.08 2.95 2.93 1.43

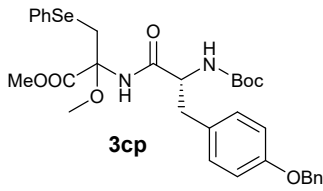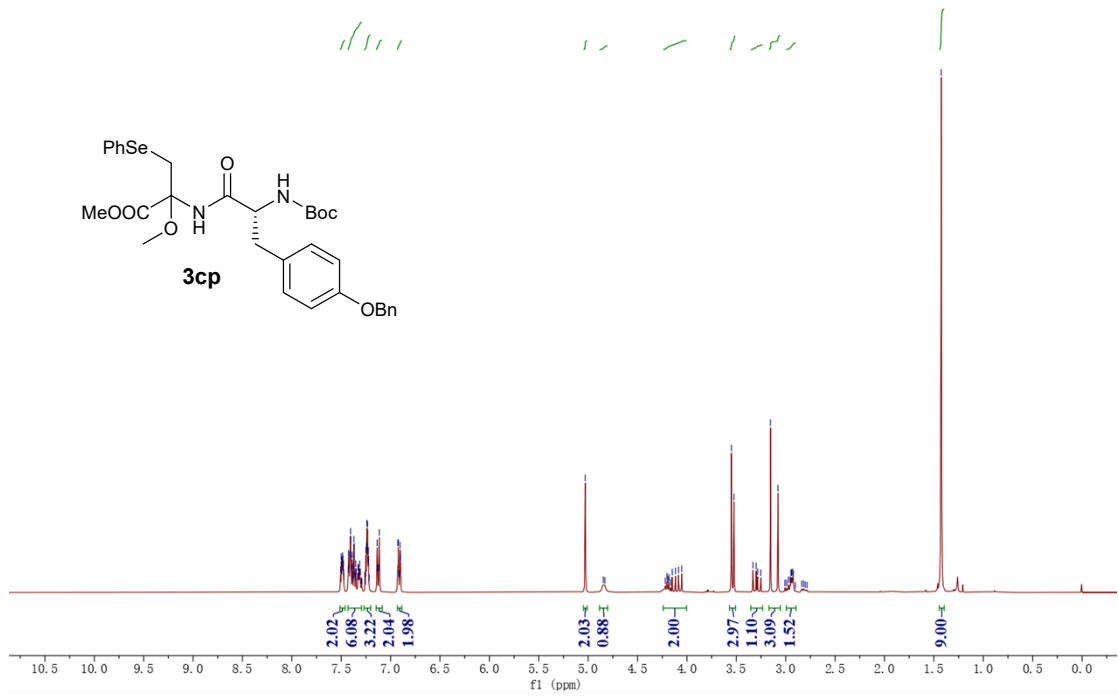

171.20 171.00 168.99 157.87 157.84 155.42 136.98 133.68 133.64 130.45 130.37 129.10 128.97 128.75 128.61 128.00 127.60 127.56 127.46 127.45 115.12 115.11 87.78 87.34 80.38 70.01 56.02 52.91 52.44 52.35 36.76 36.22 33.13 32.58 29.72 28.29 28.28

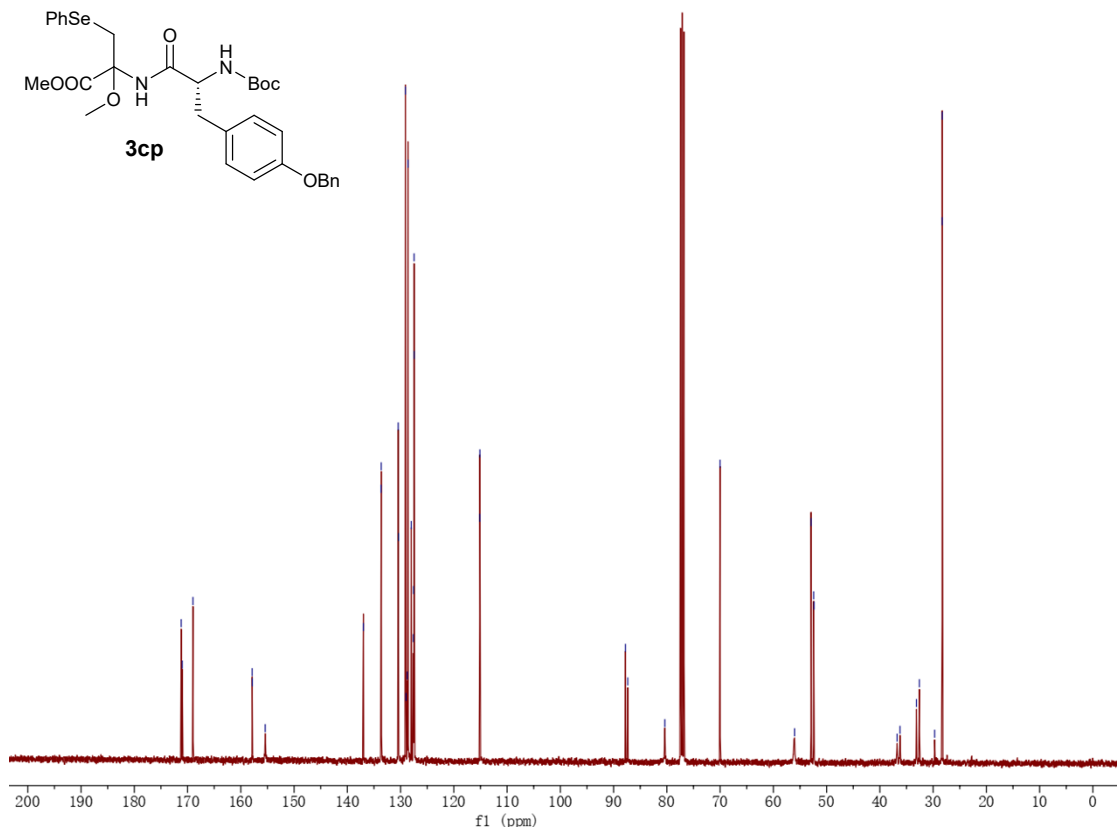

<sup>1</sup>H and <sup>13</sup>C NMR spectra of **3cq**

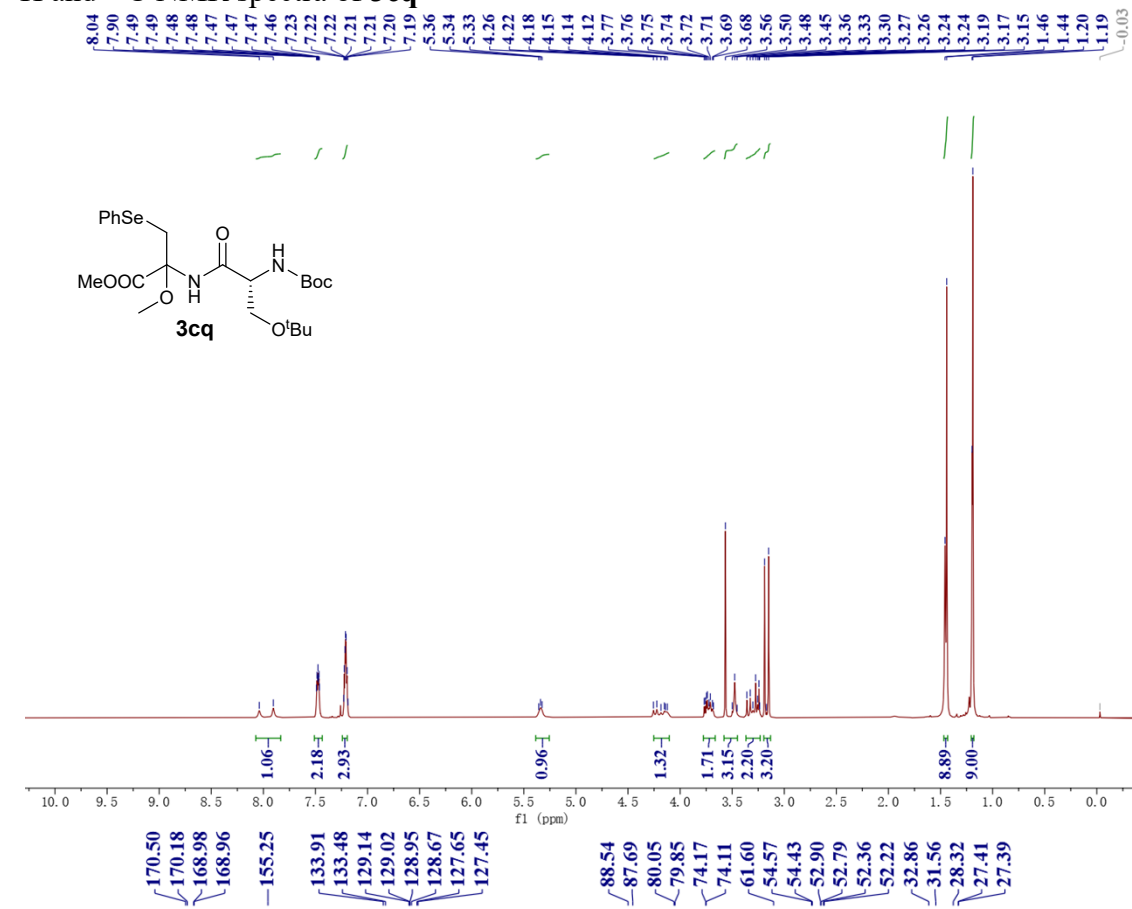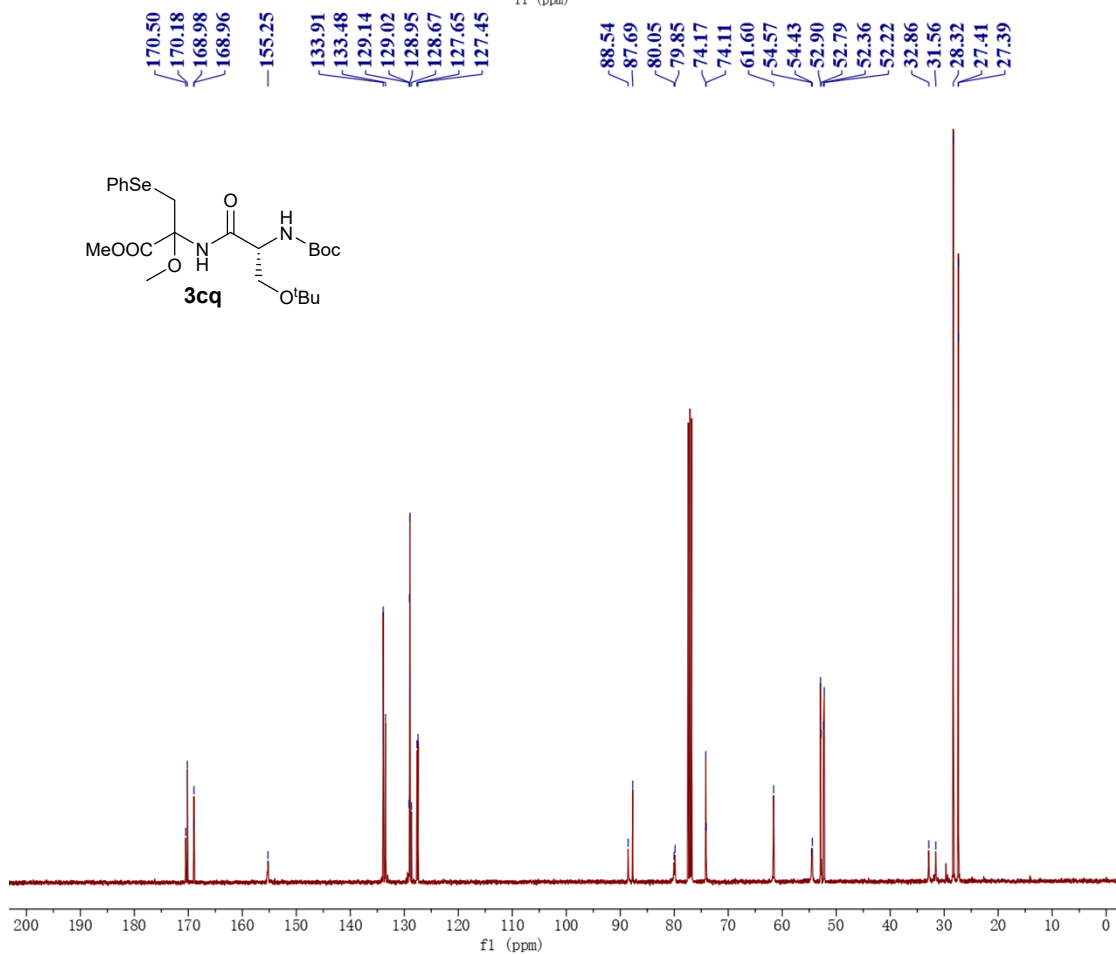

# <sup>1</sup>H and <sup>13</sup>C NMR spectra of **3cr**

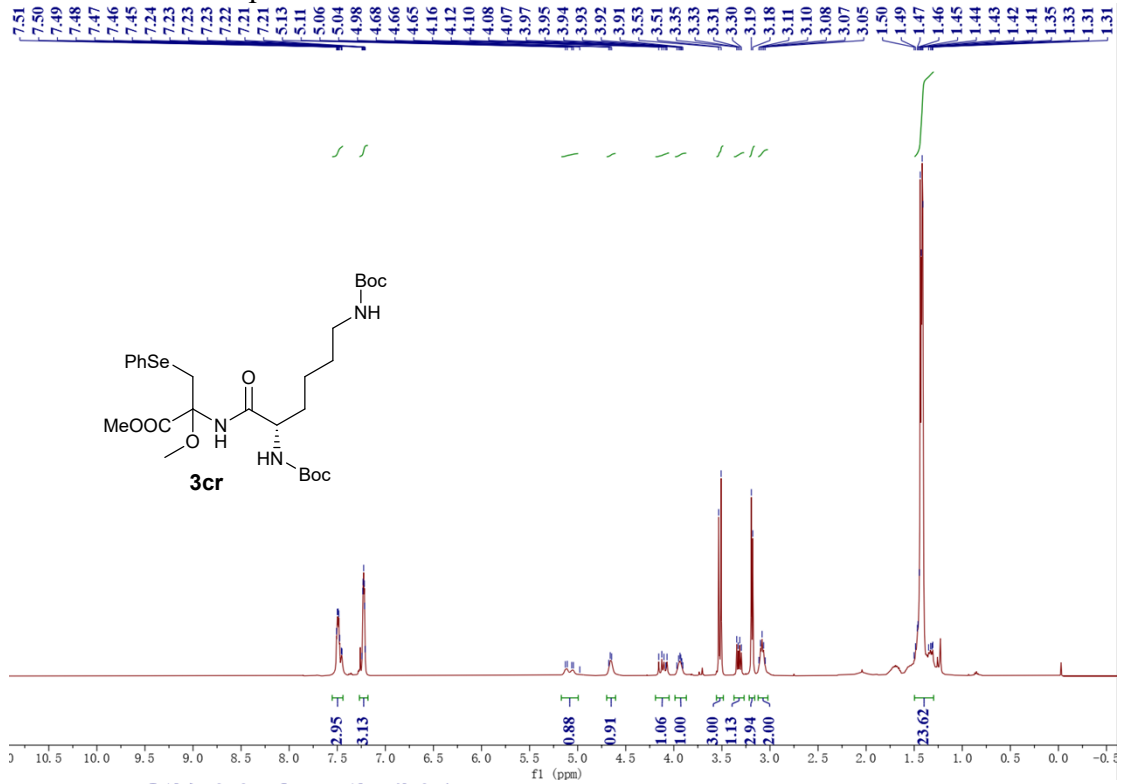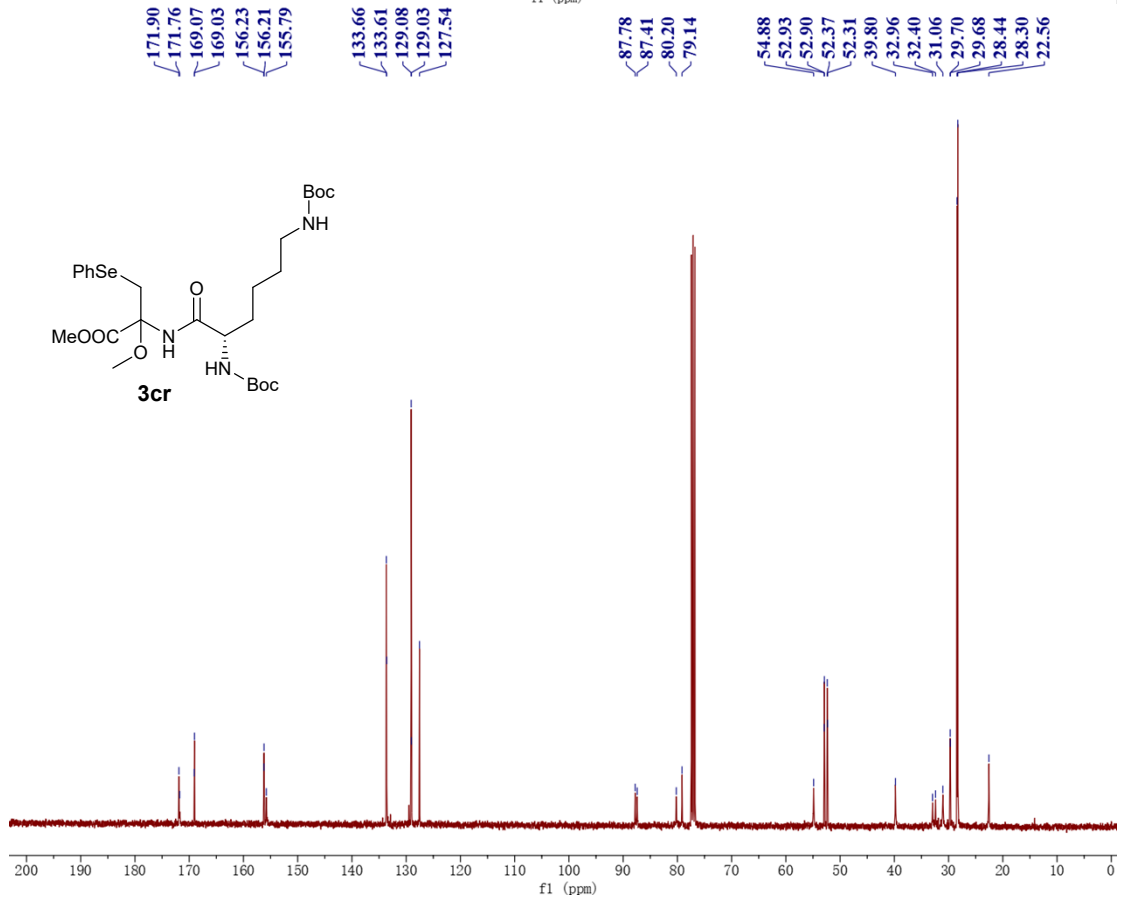

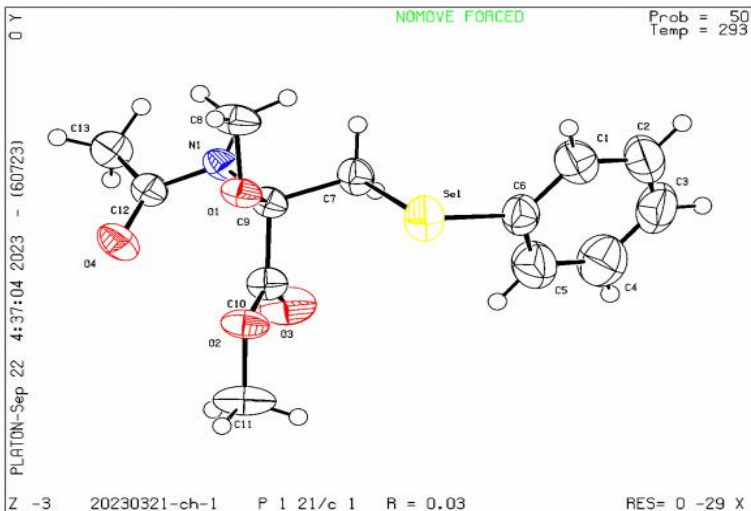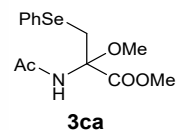

## 6. X-ray single-crystal data

### Datablock:

|                        |                           |                                   |                          |
|------------------------|---------------------------|-----------------------------------|--------------------------|
| Bond precision:        | C-C = 0.0047 Å            | Wavelength=1.54184                |                          |
| Cell:                  | a=12.5578 (3)<br>alpha=90 | b=12.4264 (3)<br>beta=105.148 (2) | c=9.7765 (2)<br>gamma=90 |
| Temperature:           | 293 K                     |                                   |                          |
|                        | Calculated                | Reported                          |                          |
| Volume                 | 1472.60 (6)               | 1472.60 (6)                       |                          |
| Space group            | P 21/c                    | P 1 21/c 1                        |                          |
| Hall group             | -P 2ybc                   | -P 2ybc                           |                          |
| Moiety formula         | C13 H17 N O4              | C13 H17 N O4                      | Se                       |
| Sum formula            | C13 H17 N O4              | C13 H17 N O4                      | Se                       |
| Mr                     | 330.24                    | 330.23                            | Se                       |
| Dx, g cm <sup>-3</sup> | 1.490                     | 1.490                             |                          |
| Z                      | 4                         | 4                                 |                          |
| Mu (mm <sup>-1</sup> ) | 3.550                     | 3.550                             |                          |
| F000                   | 672.0                     | 672.0                             |                          |
| F000'                  | 670.58                    |                                   |                          |
| h, k, lmax             | 15, 15, 12                | 15, 15, 11                        |                          |
| Nref                   | 3100                      | 2939                              |                          |
| Tmin, Tmax             | 0.639, 0.653              | 0.777, 1.000                      |                          |
| Tmin'                  | 0.579                     |                                   |                          |

Correction method= # Reported T Limits: Tmin=0.777 Tmax=1.000  
AbsCorr = MULTI-SCAN

Data completeness= 0.948                      Theta(max)= 76.573

R(reflections)= 0.0320 ( 2466)

wR2(reflections)  
=  
0.0868 (2939)

S = 1.057

Npar= 175

---

The following ALERTS were generated. Each ALERT has the format  
**test-name\_ALERT\_alert-type\_alert-level**.  
Click on the hyperlinks for more details of the test.

---

**a** **Alert level C**  
PLAT911\_ALERT\_3\_C Missing FCF Refl Between Thmin & STh/L= 0.600 5 Report

---

**a** **Alert level G**  
PLAT007\_ALERT\_5\_G Number of Unrefined Donor-H Atoms ..... 1 Report  
PLAT199\_ALERT\_1\_G Reported \_cell\_measurement\_temperature ..... (K) 293 Check  
PLAT200\_ALERT\_1\_G Reported \_diffrn\_ambient\_temperature ..... (K) 293 Check  
PLAT912\_ALERT\_4\_G Missing # of FCF Reflections Above STh/L= 0.600 133 Note  
PLAT941\_ALERT\_3\_G Average HKL Measurement Multiplicity ..... 3.8 Low  
PLAT978\_ALERT\_2\_G Number C-C Bonds with Positive Residual Density. 1 Info

- 
- 0 **ALERT level A** = Most likely a serious problem - resolve or explain
  - 0 **ALERT level B** = A potentially serious problem, consider carefully
  - 1 **ALERT level C** = Check. Ensure it is not caused by an omission or oversight
  - 6 **ALERT level G** = General information/check it is not something unexpected
- 2 ALERT type 1 CIF construction/syntax error, inconsistent or missing data
  - 1 ALERT type 2 Indicator that the structure model may be wrong or deficient
  - 2 ALERT type 3 Indicator that the structure quality may be low
  - 1 ALERT type 4 Improvement, methodology, query or suggestion
  - 1 ALERT type 5 Informative message, check
-
